# Supplementary material for: Integrative and quantitative view of the CtrA regulatory network in a stalked budding bacterium
Source: PLoS Genet. 2020 Apr 23;16(4):e1008724. doi: 10.1371/journal.pgen.1008724 (PMC7200025; doi:10.1371/journal.pgen.1008724)
Supplement: S2 Data — Shown are the number of reads and mapped reads and the fold genome coverage obtained in the CtrA and GcrA Chip-seq experiments and the respective total input (negative control) samples. (XLSX) [file pgen.1008724.s018.xlsx]

## Sheet: DataStore Summary Report
Library ID	Sample Description	Total Read Count (PFa)	Mapped Read Countb	% Mapped Readb	Read Length	Genome Fold Coverage
GHA-428	ChIP-Seq_CtrAHn_Hyphomonas_neptunium_LE670(ATCC15444)	16593619	16296463	98.21	50	219.332
GHA-430	Total-Input_CtrAHn_Hyphomonas_neptunium_LE670(ATCC15444)	25470012	25370796	99.61	50	341.462
GHA-465	ChIP-Seq_GcrACc_Hyphomonas_neptunium_LE670(ATCC15444)	12663208	11903265	94	50	160.205
GHA-466	Total-Input_GcrACc_Hyphomonas_neptunium_LE670(ATCC15444)	7285535	7119438	97.72	50	95.8196
a PF stands for "passed filter". These numbers reflect the reads that fulfill the default Q30 Illumina quality criteria (quality score greater or equal to 30).
b Bowtie alignment statistics showing the number/percentage of single-end reads that mapped to the Hyphomonas neptunium genome.
