# Supplementary material for: Integrative and quantitative view of the CtrA regulatory network in a stalked budding bacterium
Source: PLoS Genet. 2020 Apr 23;16(4):e1008724. doi: 10.1371/journal.pgen.1008724 (PMC7200025; doi:10.1371/journal.pgen.1008724)
Supplement: S4 Data — Shown are the normalized read frequencies (in RPM, reads per million reads) obtained for the CtrA and GcrA ChIP-seq experiments and the respective total input (negative control) in a series of consecutive 10 bp windows covering the replication origin region, the ctrA promotor region, and the motility island of the H. neptunium chromosome. The corresponding HNE locus tags, feature strands and feature descriptions are also reported. (XLSX) [file pgen.1008724.s020.xlsx]

## Sheet: Origin region
							Hyphomonas neptunium
							(Normalized Reads per Million unit, RPM)
							CtrA	CtrA Total input
Start	End	Relative distance from origin	Feature	ID	Feature Strand	Description	(GHA-428)	(GHA-430)
3703901	3703910	-1121	HNE_3568	hemE	-	uroporphyrinogen decarboxylase	2.98487	2.27807
3703911	3703920	-1111	HNE_3568	hemE	-	uroporphyrinogen decarboxylase	3.05767	2.3716
3703921	3703930	-1101	HNE_3568	hemE	-	uroporphyrinogen decarboxylase	3.17207	2.5787
3703931	3703940	-1091	HNE_3568	hemE	-	uroporphyrinogen decarboxylase	3.34887	3.06638
3703941	3703950	-1081	HNE_3568	hemE	-	uroporphyrinogen decarboxylase	3.32807	3.20667
3703951	3703960	-1071	HNE_3568	hemE	-	uroporphyrinogen decarboxylase	3.00567	2.95949
3703961	3703970	-1061	HNE_3568	hemE	-	uroporphyrinogen decarboxylase	2.97447	2.63882
3703971	3703980	-1051	HNE_3568	hemE	-	uroporphyrinogen decarboxylase	2.94327	2.53193
3703981	3703990	-1041	HNE_3568	hemE	-	uroporphyrinogen decarboxylase	2.79766	2.57202
3703991	3704000	-1031	HNE_3568	hemE	-	uroporphyrinogen decarboxylase	2.74566	2.42504
3704001	3704010	-1021	HNE_3568	hemE	-	uroporphyrinogen decarboxylase	2.78726	2.75239
3704011	3704020	-1011	HNE_3568	hemE	-	uroporphyrinogen decarboxylase	3.21367	3.13987
3704021	3704030	-1001	HNE_3568	hemE	-	uroporphyrinogen decarboxylase	3.10967	3.24007
3704031	3704040	-991	HNE_3568	hemE	-	uroporphyrinogen decarboxylase	3.16167	3.39373
3704041	3704050	-981	HNE_3568	hemE	-	uroporphyrinogen decarboxylase	3.35927	3.11314
3704051	3704060	-971	HNE_3568	hemE	-	uroporphyrinogen decarboxylase	3.18247	2.84592
3704061	3704070	-961	HNE_3568	hemE	-	uroporphyrinogen decarboxylase	2.93287	2.45177
3704071	3704080	-951	HNE_3568	hemE	-	uroporphyrinogen decarboxylase	2.65206	2.04425
3704081	3704090	-941	HNE_3568	hemE	-	uroporphyrinogen decarboxylase	2.63126	2.05761
3704091	3704100	-931	HNE_3568	hemE	-	uroporphyrinogen decarboxylase	2.69366	2.14446
3704101	3704110	-921	HNE_3568	hemE	-	uroporphyrinogen decarboxylase	2.46486	2.37828
3704111	3704120	-911	HNE_3568	hemE	-	uroporphyrinogen decarboxylase	2.39205	2.63882
3704121	3704130	-901	HNE_3568	hemE	-	uroporphyrinogen decarboxylase	2.39205	2.83256
3704131	3704140	-891	HNE_3568	hemE	-	uroporphyrinogen decarboxylase	2.51686	3.15323
3704141	3704150	-881	HNE_3568	hemE	-	uroporphyrinogen decarboxylase	2.58966	3.11982
3704151	3704160	-871	HNE_3568	hemE	-	uroporphyrinogen decarboxylase	2.41285	3.06638
3704161	3704170	-861	HNE_3568	hemE	-	uroporphyrinogen decarboxylase	2.75606	3.30688
3704171	3704180	-851	HNE_3568	hemE	-	uroporphyrinogen decarboxylase	2.90166	3.60082
3704181	3704190	-841	HNE_3568	hemE	-	uroporphyrinogen decarboxylase	3.12007	3.71439
3704191	3704200	-831	HNE_3568	hemE	-	uroporphyrinogen decarboxylase	2.99527	3.51398
3704201	3704210	-821	HNE_3568	hemE	-	uroporphyrinogen decarboxylase	3.02647	3.01961
3704211	3704220	-811	HNE_3568	hemE	-	uroporphyrinogen decarboxylase	3.13047	2.6121
3704221	3704230	-801	HNE_3568	hemE	-	uroporphyrinogen decarboxylase	2.96407	2.35156
3704231	3704240	-791	HNE_3568	hemE	-	uroporphyrinogen decarboxylase	3.10967	2.67891
3704241	3704250	-781	HNE_3568	hemE	-	uroporphyrinogen decarboxylase	3.18247	2.93945
3704251	3704260	-771	HNE_3568	hemE	-	uroporphyrinogen decarboxylase	3.13047	3.18663
3704261	3704270	-761	HNE_3568	hemE	-	uroporphyrinogen decarboxylase	3.04727	3.40709
3704271	3704280	-751	HNE_3568	hemE	-	uroporphyrinogen decarboxylase	2.82886	3.52066
3704281	3704290	-741	HNE_3568	hemE	-	uroporphyrinogen decarboxylase	2.72486	3.17327
3704291	3704300	-731	HNE_3568	hemE	-	uroporphyrinogen decarboxylase	2.54806	2.886
3704301	3704310	-721	HNE_3568	hemE	-	uroporphyrinogen decarboxylase	2.34005	2.72567
3704311	3704320	-711	HNE_3568	hemE	-	uroporphyrinogen decarboxylase	2.51686	3.07974
3704321	3704330	-701	HNE_3568	hemE	-	uroporphyrinogen decarboxylase	2.72486	3.64759
3704331	3704340	-691	HNE_3568	hemE	-	uroporphyrinogen decarboxylase	2.80806	4.02838
3704341	3704350	-681	HNE_3568	hemE	-	uroporphyrinogen decarboxylase	2.99527	4.55614
3704351	3704360	-671	HNE_3568	hemE	-	uroporphyrinogen decarboxylase	3.06807	4.43589
3704361	3704370	-661	HNE_3568	hemE	-	uroporphyrinogen decarboxylase	3.14087	4.10187
3704371	3704380	-651	HNE_3568	hemE	-	uroporphyrinogen decarboxylase	3.05767	3.87473
3704381	3704390	-641	HNE_3568	hemE	-	uroporphyrinogen decarboxylase	3.01607	3.82796
3704391	3704400	-631	HNE_3568	hemE	-	uroporphyrinogen decarboxylase	3.09927	3.8146
3704401	3704410	-621	HNE_3568	hemE	-	uroporphyrinogen decarboxylase	3.04727	3.90145
3704411	3704420	-611	HNE_3568	hemE	-	uroporphyrinogen decarboxylase	2.97447	3.82128
3704421	3704430	-601	HNE_3568	hemE	-	uroporphyrinogen decarboxylase	2.98487	4.08182
3704431	3704440	-591	HNE_3568	hemE	-	uroporphyrinogen decarboxylase	3.06807	4.2288
3704441	3704450	-581	HNE_3568	hemE	-	uroporphyrinogen decarboxylase	2.96407	4.04174
3704451	3704460	-571	HNE_3568	hemE	-	uroporphyrinogen decarboxylase	2.84966	3.79456
3704461	3704470	-561	HNE_3568	hemE	-	uroporphyrinogen decarboxylase	2.82886	3.49393
3704471	3704480	-551	HNE_3568	hemE	-	uroporphyrinogen decarboxylase	3.05767	3.52734
3704481	3704490	-541	HNE_3568	hemE	-	uroporphyrinogen decarboxylase	3.14087	3.34696
3704491	3704500	-531	HNE_3568	hemE	-	uroporphyrinogen decarboxylase	3.06807	3.0263
3704501	3704510	-521	HNE_3568	hemE	-	uroporphyrinogen decarboxylase	3.12007	3.11982
3704511	3704520	-511	HNE_3568	hemE	-	uroporphyrinogen decarboxylase	3.21367	3.32692
3704521	3704530	-501	HNE_3568	hemE	-	uroporphyrinogen decarboxylase	3.31767	3.46721
3704531	3704540	-491	HNE_3568	hemE	-	uroporphyrinogen decarboxylase	3.04727	3.0597
3704541	3704550	-481	HNE_3568	hemE	-	uroporphyrinogen decarboxylase	3.15127	2.62546
3704551	3704560	-471	HNE_3568	hemE	-	uroporphyrinogen decarboxylase	3.36968	2.31148
3704561	3704570	-461	HNE_3568	hemE	-	uroporphyrinogen decarboxylase	3.26567	1.8906
3704571	3704580	-451	HNE_3568	hemE	-	uroporphyrinogen decarboxylase	3.51528	1.49645
3704581	3704590	-441	HNE_3568	hemE	-	uroporphyrinogen decarboxylase	3.31767	1.2359
3704591	3704600	-431	HNE_3568	hemE	-	uroporphyrinogen decarboxylase	3.61928	1.17578
3704601	3704610	-421	HNE_3568	hemE	-	uroporphyrinogen decarboxylase	3.34887	1.36952
3704611	3704620	-411	HNE_3568	hemE	-	uroporphyrinogen decarboxylase	3.15127	1.48309
3704621	3704630	-401	HNE_3568	hemE	-	uroporphyrinogen decarboxylase	3.31767	1.81043
3704631	3704640	-391	HNE_3568	hemE	-	uroporphyrinogen decarboxylase	3.16167	1.98413
3704641	3704650	-381	HNE_3568	hemE	-	uroporphyrinogen decarboxylase	3.29687	2.13778
3704651	3704660	-371	HNE_3568	hemE	-	uroporphyrinogen decarboxylase	3.49448	2.15782
3704661	3704670	-361	HNE_3568	hemE	-	uroporphyrinogen decarboxylase	3.58808	1.81043
3704671	3704680	-351	HNE_3568	hemE	-	uroporphyrinogen decarboxylase	3.97289	1.6501
3704681	3704690	-341	HNE_3568	hemE	-	uroporphyrinogen decarboxylase	4.07689	1.24927
3704691	3704700	-331	HNE_3568	hemE	-	uroporphyrinogen decarboxylase	4.26409	1.01545
3704701	3704710	-321	HNE_3568	hemE	-	uroporphyrinogen decarboxylase	4.21209	1.28267
3704711	3704720	-311	HNE_3568	hemE	-	uroporphyrinogen decarboxylase	3.96249	1.65678
3704721	3704730	-301	HNE_3568	hemE	-	uroporphyrinogen decarboxylase	4.12889	2.00417
3704731	3704740	-291	HNE_3568	hemE	-	uroporphyrinogen decarboxylase	4.3369	2.48517
3704741	3704750	-281	HNE_3568	hemE	-	uroporphyrinogen decarboxylase	4.3161	2.55198
3704751	3704760	-271	HNE_3568	hemE	-	uroporphyrinogen decarboxylase	4.3785	2.71899
3704761	3704770	-261	HNE_3568	hemE	-	uroporphyrinogen decarboxylase	4.6385	2.27139
3704771	3704780	-251	HNE_3568	hemE	-	uroporphyrinogen decarboxylase	4.5761	1.8572
3704781	3704790	-241	HNE_3568	hemE	-	uroporphyrinogen decarboxylase	4.5137	1.52985
3704791	3704800	-231	HNE_3568	hemE	-	uroporphyrinogen decarboxylase	4.3161	0.988723
3704801	3704810	-221	HNE_3568	hemE	-	uroporphyrinogen decarboxylase	4.82571	0.855112
3704811	3704820	-211	HNE_3568	hemE	-	uroporphyrinogen decarboxylase	4.95051	0.741543
3704821	3704830	-201	HNE_3568	hemE	-	uroporphyrinogen decarboxylase	5.38732	0.861793
3704831	3704840	-191	HNE_3568	hemE	-	uroporphyrinogen decarboxylase	5.89693	1.06889
3704841	3704850	-181	HNE_3568	hemE	-	uroporphyrinogen decarboxylase	6.58335	1.21586
3704851	3704860	-171	HNE_3568	hemE	-	uroporphyrinogen decarboxylase	6.66655	1.42296
3704861	3704870	-161	HNE_3568	hemE	-	uroporphyrinogen decarboxylase	6.73935	1.42296
3704871	3704880	-151	HNE_3568	hemE	-	uroporphyrinogen decarboxylase	7.11376	1.32275
3704881	3704890	-141	HNE_3568	hemE	-	uroporphyrinogen decarboxylase	7.06176	1.2359
3704891	3704900	-131	HNE_3568	hemE	-	uroporphyrinogen decarboxylase	7.52977	1.25595
3704901	3704910	-121	HNE_3568	hemE	-	uroporphyrinogen decarboxylase	7.31136	1.24927
3704911	3704920	-111	HNE_3568	hemE	-	uroporphyrinogen decarboxylase	7.95618	1.2025
3704921	3704930	-101	HNE_3568	hemE	-	uroporphyrinogen decarboxylase	8.61139	1.22922
3704931	3704940	-91	HNE_3568	hemE	-	uroporphyrinogen decarboxylase	8.8714	1.28935
3704941	3704950	-81					9.79702	1.11565
3704951	3704960	-71					10.421	0.808348
3704961	3704970	-61					11.4923	0.627973
3704971	3704980	-51					12.4907	0.467639
3704981	3704990	-41					13.0939	0.280584
3704991	3705000	-31					14.8307	0.100208
3705001	3705010	-21					14.7163	0.0668056
3705011	3705020	-11					16.3908	0.0801668
1	10	1					17.7116	0.36075
11	20	11					18.4188	0.641334
21	30	21					19.2092	0.855112
31	40	31					18.7932	1.10897
41	50	41					19.4276	1.10897
51	60	51					19.3652	1.00208
61	70	61					20.3221	0.774945
71	80	71					21.2165	0.501042
81	90	81					20.9773	0.273903
91	100	91					21.6741	0.0668056
101	110	101					21.9965	0.0601251
111	120	111					20.8941	0.0601251
121	130	121					19.7396	0.0734862
131	140	131					18.5332	0.0734862
141	150	141					18.7412	0.0534445
151	160	151					18.0964	0.0601251
161	170	161					17.1188	0.0734862
171	180	171					16.1204	0.0734862
181	190	181					15.5483	0.0601251
191	200	191					13.5515	0.0935279
201	210	201					12.8235	0.427556
211	220	211					10.3482	0.741543
221	230	221					8.9858	1.15574
231	240	231					8.03938	1.55657
241	250	241					6.59375	1.80375
251	260	251	HNE_0001	HNE_0001	+	conserved hypothetical protein	5.60573	1.96409
261	270	261	HNE_0001	HNE_0001	+	conserved hypothetical protein	4.3161	1.77703
271	280	271	HNE_0001	HNE_0001	+	conserved hypothetical protein	4.19129	1.52985
281	290	281	HNE_0001	HNE_0001	+	conserved hypothetical protein	4.22249	1.28267
291	300	291	HNE_0001	HNE_0001	+	conserved hypothetical protein	3.87929	1.43632
301	310	301	HNE_0001	HNE_0001	+	conserved hypothetical protein	3.62968	1.64342
311	320	311	HNE_0001	HNE_0001	+	conserved hypothetical protein	3.86889	1.90396
321	330	321	HNE_0001	HNE_0001	+	conserved hypothetical protein	3.65048	2.31148
331	340	331	HNE_0001	HNE_0001	+	conserved hypothetical protein	3.51528	2.77243
341	350	341	HNE_0001	HNE_0001	+	conserved hypothetical protein	3.14087	2.77911
351	360	351	HNE_0001	HNE_0001	+	conserved hypothetical protein	3.02647	2.3382
361	370	361	HNE_0001	HNE_0001	+	conserved hypothetical protein	2.71446	2.05093
371	380	371	HNE_0001	HNE_0001	+	conserved hypothetical protein	2.52726	1.99749
381	390	381	HNE_0001	HNE_0001	+	conserved hypothetical protein	2.57926	1.96409
391	400	391	HNE_0001	HNE_0001	+	conserved hypothetical protein	2.94327	2.18454
401	410	401	HNE_0001	HNE_0001	+	conserved hypothetical protein	2.81846	2.56534
411	420	411	HNE_0001	HNE_0001	+	conserved hypothetical protein	2.84966	3.26012
421	430	421	HNE_0001	HNE_0001	+	conserved hypothetical protein	2.82886	3.52066
431	440	431	HNE_0001	HNE_0001	+	conserved hypothetical protein	2.81846	3.68099
441	450	441	HNE_0001	HNE_0001	+	conserved hypothetical protein	2.67286	3.68099
451	460	451	HNE_0001	HNE_0001	+	conserved hypothetical protein	2.34005	3.62087
461	470	461	HNE_0001	HNE_0001	+	conserved hypothetical protein	2.56886	3.5741
471	480	471	HNE_0001	HNE_0001	+	conserved hypothetical protein	2.87046	3.46053
481	490	481	HNE_0001	HNE_0001	+	conserved hypothetical protein	2.91206	3.43381
491	500	491	HNE_0001	HNE_0001	+	conserved hypothetical protein	2.86006	3.52066
501	510	501	HNE_0001	HNE_0001	+	conserved hypothetical protein	2.98487	3.58746
511	520	511	HNE_0001	HNE_0001	+	conserved hypothetical protein	2.83926	3.38705
521	530	521	HNE_0001	HNE_0001	+	conserved hypothetical protein	2.57926	3.34696
531	540	531	HNE_0001	HNE_0001	+	conserved hypothetical protein	2.61046	3.21335
541	550	541	HNE_0001	HNE_0001	+	conserved hypothetical protein	2.72486	3.34696
551	560	551	HNE_0001	HNE_0001	+	conserved hypothetical protein	2.88086	3.40709
561	570	561	HNE_0001	HNE_0001	+	conserved hypothetical protein	2.87046	3.42713
571	580	571	HNE_0001	HNE_0001	+	conserved hypothetical protein	3.16167	3.68767
581	590	581	HNE_0001	HNE_0001	+	conserved hypothetical protein	3.29687	3.68099
591	600	591	HNE_0001	HNE_0001	+	conserved hypothetical protein	3.41128	3.94153
601	610	601	HNE_0001	HNE_0001	+	conserved hypothetical protein	3.28647	3.72107
611	620	611	HNE_0001	HNE_0001	+	conserved hypothetical protein	3.38008	3.20667
621	630	621	HNE_0001	HNE_0001	+	conserved hypothetical protein	3.53608	2.61878
631	640	631	HNE_0001	HNE_0001	+	conserved hypothetical protein	3.31767	2.23799
641	650	641	HNE_0001	HNE_0001	+	conserved hypothetical protein	3.15127	1.93068
651	660	651	HNE_0001	HNE_0001	+	conserved hypothetical protein	3.15127	1.26931
661	670	661	HNE_0001	HNE_0001	+	conserved hypothetical protein	3.47368	1.49645
671	680	671	HNE_0001	HNE_0001	+	conserved hypothetical protein	3.57768	1.75031
681	690	681	HNE_0001	HNE_0001	+	conserved hypothetical protein	3.48408	2.0977
691	700	691	HNE_0001	HNE_0001	+	conserved hypothetical protein	3.68168	2.44509
701	710	701	HNE_0001	HNE_0001	+	conserved hypothetical protein	3.83769	2.77911
711	720	711	HNE_0001	HNE_0001	+	conserved hypothetical protein	3.88969	3.16659
721	730	721	HNE_0001	HNE_0001	+	conserved hypothetical protein	3.57768	2.99957
731	740	731	HNE_0001	HNE_0001	+	conserved hypothetical protein	3.58808	3.26012
741	750	741	HNE_0001	HNE_0001	+	conserved hypothetical protein	3.65048	3.13987
751	760	751	HNE_0001	HNE_0001	+	conserved hypothetical protein	3.74408	3.1265
761	770	761	HNE_0001	HNE_0001	+	conserved hypothetical protein	3.42168	2.87932
771	780	771	HNE_0001	HNE_0001	+	conserved hypothetical protein	3.26567	2.72567
781	790	781	HNE_0001	HNE_0001	+	conserved hypothetical protein	3.33847	2.69895
791	800	791	HNE_0001	HNE_0001	+	conserved hypothetical protein	3.40088	2.27139
801	810	801	HNE_0001	HNE_0001	+	conserved hypothetical protein	3.54648	1.94404
811	820	811	HNE_0001	HNE_0001	+	conserved hypothetical protein	3.52568	1.67014
821	830	821	HNE_0001	HNE_0001	+	conserved hypothetical protein	3.69208	1.64342
831	840	831	HNE_0001	HNE_0001	+	conserved hypothetical protein	3.64008	1.71022
841	850	841	HNE_0001	HNE_0001	+	conserved hypothetical protein	3.54648	1.98413
851	860	851	HNE_0001	HNE_0001	+	conserved hypothetical protein	3.23447	2.28475
861	870	861	HNE_0001	HNE_0001	+	conserved hypothetical protein	3.05767	2.7858
871	880	871	HNE_0001	HNE_0001	+	conserved hypothetical protein	2.98487	3.05302
881	890	881	HNE_0001	HNE_0001	+	conserved hypothetical protein	3.12007	3.42713
891	900	891	HNE_0001	HNE_0001	+	conserved hypothetical protein	3.31767	3.21335
901	910	901	HNE_0001	HNE_0001	+	conserved hypothetical protein	3.32807	2.76575
911	920	911	HNE_0001	HNE_0001	+	conserved hypothetical protein	3.71288	2.43173
921	930	921	HNE_0001	HNE_0001	+	conserved hypothetical protein	3.68168	2.12442
931	940	931	HNE_0001	HNE_0001	+	conserved hypothetical protein	3.47368	2.01753
941	950	941	HNE_0001	HNE_0001	+	conserved hypothetical protein	3.03687	1.99081
951	960	951	HNE_0001	HNE_0001	+	conserved hypothetical protein	2.96407	2.29143
961	970	961	HNE_0001	HNE_0001	+	conserved hypothetical protein	2.83926	2.79916
971	980	971	HNE_0001	HNE_0001	+	conserved hypothetical protein	2.80806	3.37368
981	990	981	HNE_0001	HNE_0001	+	conserved hypothetical protein	2.70406	3.65427
991	1000	991	HNE_0001	HNE_0001	+	conserved hypothetical protein	2.68326	3.58078
1001	1010	1001	HNE_0001	HNE_0001	+	conserved hypothetical protein	2.95367	3.44717
1011	1020	1011	HNE_0001	HNE_0001	+	conserved hypothetical protein	3.05767	3.34028
1021	1030	1021	HNE_0001	HNE_0001	+	conserved hypothetical protein	3.06807	3.34028
1031	1040	1031	HNE_0001	HNE_0001	+	conserved hypothetical protein	3.03687	3.37368
1041	1050	1041	HNE_0001	HNE_0001	+	conserved hypothetical protein	3.09927	3.59414
1051	1060	1051	HNE_0001	HNE_0001	+	conserved hypothetical protein	3.07847	3.59414
1061	1070	1061	HNE_0001	HNE_0001	+	conserved hypothetical protein	2.98487	3.67431
1071	1080	1071	HNE_0001	HNE_0001	+	conserved hypothetical protein	3.20327	4.01502
1081	1090	1081	HNE_0001	HNE_0001	+	conserved hypothetical protein	3.17207	3.96157
1091	1100	1091	HNE_0001	HNE_0001	+	conserved hypothetical protein	3.00567	4.00166

## Sheet: ctrA promoter region
						Hyphomonas neptunium (Normalized Reads per Million unit, RPM)
						CtrA	CtrA Total input	GcrA	GcrA Total input
Start	End	Feature	ID	Feature Strand	Description	(GHA-428)	(GHA-430)	(GHA-465)	(GHA-466)
958331	958340	HNE_0943	motR	+	motR protein	2.38568	1.44577	2.75795	2.01101
958341	958350	HNE_0943	motR	+	motR protein	2.29151	0.844559	2.87231	1.81948
958351	958360	HNE_0943	motR	+	motR protein	2.19733	0.701413	3.30282	1.74766
958361	958370	HNE_0943	motR	+	motR protein	1.96714	0.715728	3.51135	1.58008
958371	958380	HNE_0943	motR	+	motR protein	2.14502	0.415122	3.5248	1.6519
958381	958390	HNE_0943	motR	+	motR protein	2.15548	0.515324	3.51135	1.36461
958391	958400	HNE_0943	motR	+	motR protein	2.45892	0.443751	3.6257	1.60402
958401	958410	HNE_0943	motR	+	motR protein	2.57402	0.81593	3.6997	1.7716
958411	958420	HNE_0943	motR	+	motR protein	2.66819	0.987704	3.55171	1.79554
958421	958430	HNE_0943	motR	+	motR protein	2.60541	1.17379	3.45753	1.7716
958431	958440	HNE_0943	motR	+	motR protein	2.49031	1.274	3.26246	1.81948
958441	958450	HNE_0943	motR	+	motR protein	2.62634	1.5746	3.37681	2.20253
958451	958460	HNE_0943	motR	+	motR protein	2.47985	1.86089	3.51135	2.20253
958461	958470	HNE_0943	motR	+	motR protein	2.42753	1.90384	3.73333	2.58558
958471	958480	HNE_0943	motR	+	motR protein	2.55309	1.86089	3.90822	2.80104
958481	958490	HNE_0943	motR	+	motR protein	2.50078	1.78932	3.99567	2.80104
958491	958500	HNE_0943	motR	+	motR protein	2.59495	2.01835	4.37237	2.96863
958501	958510	HNE_0943	motR	+	motR protein	2.64726	1.84658	4.406	2.87286
958511	958520	HNE_0943	motR	+	motR protein	2.80422	1.4744	4.16384	2.92075
958521	958530	HNE_0943	motR	+	motR protein	2.71005	1.44577	4.0024	2.6574
958531	958540	HNE_0943	motR	+	motR protein	2.68912	1.35988	4.16384	2.63346
958541	958550	HNE_0943	motR	+	motR protein	2.81468	1.17379	4.14366	2.84892
958551	958560	HNE_0943	motR	+	motR protein	2.97163	1.50303	4.26474	2.84892
958561	958570	HNE_0943	motR	+	motR protein	2.88792	2.07561	4.25129	3.01651
958571	958580	HNE_0943	motR	+	motR protein	2.83561	2.10424	4.28492	3.04045
958581	958590	HNE_0943	motR	+	motR protein	3.05534	2.17581	4.23783	2.99257
958591	958600	HNE_0943	motR	+	motR protein	3.02395	2.13287	4.09657	3.49532
958601	958610	HNE_0943	motR	+	motR protein	2.91932	2.1615	4.15711	3.51926
958611	958620	HNE_0943	motR	+	motR protein	2.54263	1.34557	3.88804	3.23197
958621	958630	HNE_0943	motR	+	motR protein	2.59495	0.844559	3.73333	3.06439
958631	958640	HNE_0943	motR	+	motR protein	2.60541	0.801615	3.7266	2.72922
958641	958650	HNE_0943	motR	+	motR protein	2.59495	0.772986	3.74678	2.87286
958651	958660	HNE_0943	motR	+	motR protein	2.64726	0.758671	3.91495	2.34617
958661	958670	HNE_0943	motR	+	motR protein	2.67865	0.730042	3.86114	2.34617
958671	958680	HNE_0943	motR	+	motR protein	2.76236	0.744357	3.73333	2.58558
958681	958690	HNE_0943	motR	+	motR protein	2.81468	1.07359	4.07639	2.6574
958691	958700	HNE_0943	motR	+	motR protein	2.74144	1.48871	4.01585	3.27985
958701	958710	HNE_0943	motR	+	motR protein	2.68912	1.34557	3.85441	3.23197
958711	958720	HNE_0943	motR	+	motR protein	2.60541	1.63186	3.49789	3.25591
958721	958730	HNE_0943	motR	+	motR protein	2.6368	1.6748	3.19519	3.37562
958731	958740	HNE_0943	motR	+	motR protein	2.6368	1.73206	3.02702	3.13621
958741	958750	HNE_0943	motR	+	motR protein	2.88792	1.88952	2.75795	3.49532
958751	958760	HNE_0943	motR	+	motR protein	2.95071	1.76069	2.69069	3.25591
958761	958770	HNE_0943	motR	+	motR protein	2.97163	2.11855	2.60324	3.39956
958771	958780	HNE_0943	motR	+	motR protein	3.07627	2.27601	2.82522	3.51926
958781	958790	HNE_0943	motR	+	motR protein	3.296	2.70545	3.37681	3.56714
958791	958800	HNE_0943	motR	+	motR protein	3.51573	2.61956	3.60552	4.02201
958801	958810	HNE_0943	motR	+	motR protein	3.39017	2.2617	3.45081	3.71078
958811	958820	HNE_0943	motR	+	motR protein	3.35878	2.79134	3.1481	3.32773
958821	958830	HNE_0943	motR	+	motR protein	3.55759	2.86291	2.83195	2.92075
958831	958840	HNE_0943	motR	+	motR protein	3.62037	2.81997	2.17946	2.72922
958841	958850	HNE_0943	motR	+	motR protein	3.80871	2.4621	1.62114	2.5377
958851	958860	HNE_0943	motR	+	motR protein	3.8401	2.76271	1.41261	2.03495
958861	958870	HNE_0943	motR	+	motR protein	3.88196	3.02037	1.37898	2.01101
958871	958880	HNE_0943	motR	+	motR protein	3.90288	3.1492	1.55387	2.17859
958881	958890	HNE_0943	motR	+	motR protein	3.87149	2.59093	1.70859	2.25041
958891	958900	HNE_0943	motR	+	motR protein	3.90288	2.44779	2.04492	2.17859
958901	958910	HNE_0943	motR	+	motR protein	3.70408	2.56231	2.3409	2.22647
958911	958920	HNE_0943	motR	+	motR protein	3.68315	2.27601	2.45525	2.39405
958921	958930	HNE_0943	motR	+	motR protein	3.57852	2.19013	2.60324	2.72922
958931	958940	HNE_0943	motR	+	motR protein	3.89242	1.74638	2.58979	2.63346
958941	958950	HNE_0943	motR	+	motR protein	3.92381	1.83226	2.75123	2.58558
958951	958960	HNE_0943	motR	+	motR protein	3.86103	1.41714	2.61669	2.7771
958961	958970	HNE_0943	motR	+	motR protein	4.10169	1.41714	2.45525	3.18409
958971	958980	HNE_0943	motR	+	motR protein	3.99706	1.35988	2.39471	3.06439
958981	958990	HNE_0943	motR	+	motR protein	4.16447	1.24537	2.31399	2.82498
958991	959000	HNE_0943	motR	+	motR protein	4.31096	1.46008	2.34762	3.04045
959001	959010	HNE_0943	motR	+	motR protein	4.44699	1.34557	2.38799	3.08833
959011	959020	HNE_0943	motR	+	motR protein	4.58301	1.44577	2.6436	3.06439
959021	959030	HNE_0943	motR	+	motR protein	4.66672	1.41714	2.69069	3.20803
959031	959040	HNE_0943	motR	+	motR protein	5.25267	1.63186	2.38799	3.4235
959041	959050	HNE_0943	motR	+	motR protein	5.53519	1.97541	2.07183	3.23197
959051	959060	HNE_0943	motR	+	motR protein	6.42459	2.08992	1.78258	2.96863
959061	959070	HNE_0943	motR	+	motR protein	7.39769	3.12057	1.4597	3.20803
959071	959080	HNE_0943	motR	+	motR protein	10.1182	4.13691	1.05609	3.06439
959081	959090	HNE_0943	motR	+	motR protein	12.7027	4.83832	0.813933	2.75316
959091	959100	HNE_0943	motR	+	motR protein	14.6384	4.53771	0.961921	2.46588
959101	959110	HNE_0943	motR	+	motR protein	17.3799	4.93852	1.15027	2.70528
959111	959120	HNE_0943	motR	+	motR protein	18.2693	5.68288	1.31844	2.7771
959121	959130	HNE_0943	motR	+	motR protein	19.0226	5.25344	1.63459	2.6574
959131	959140	HNE_0943	motR	+	motR protein	17.7566	5.62562	1.50679	2.48982
959141	959150	HNE_0943	motR	+	motR protein	19.0959	7.05707	1.31171	2.25041
959151	959160	HNE_0943	motR	+	motR protein	19.054	7.75849	1.083	2.01101
959161	959170	HNE_0943	motR	+	motR protein	20.4666	9.26152	0.760119	1.67584
959171	959180					21.2723	11.0079	0.45069	1.91524
959181	959190					24.0451	14.0855	0.0605405	1.93918
959191	959200					26.6505	15.2736	0.0269069	1.74766
959201	959210					26.5564	16.4331	0.00672672	1.58008
959211	959220					26.3471	17.9075	0.0134534	1.58008
959221	959230					25.217	20.6273	0.0134534	1.43643
959231	959240					26.3994	21.2571	0.0134534	1.34067
959241	959250					24.5474	20.3267	0.0134534	1.02944
959251	959260					23.3964	22.0444	0.0269069	1.12521
959261	959270					23.1243	24.8644	0.0941741	1.17309
959271	959280					24.7671	28.3858	0.107628	1.60402
959281	959290					24.1497	24.9216	0.248889	1.74766
959291	959300					21.6804	24.6783	0.417057	1.53219
959301	959310	HNE_0944	ctrA	+	DNA-binding response regulator CtrA	21.8582	24.12	0.511231	1.46037
959311	959320	HNE_0944	ctrA	+	DNA-binding response regulator CtrA	20.9061	21.6865	0.692852	1.79554
959321	959330	HNE_0944	ctrA	+	DNA-binding response regulator CtrA	18.8238	17.4351	0.867747	1.91524
959331	959340	HNE_0944	ctrA	+	DNA-binding response regulator CtrA	15.4337	12.2246	1.04937	1.6519
959341	959350	HNE_0944	ctrA	+	DNA-binding response regulator CtrA	13.8432	11.7522	1.09646	1.69978
959351	959360	HNE_0944	ctrA	+	DNA-binding response regulator CtrA	12.755	8.5601	1.157	2.05889
959361	959370	HNE_0944	ctrA	+	DNA-binding response regulator CtrA	11.0285	7.50083	1.21081	2.37011
959371	959380	HNE_0944	ctrA	+	DNA-binding response regulator CtrA	9.65781	8.03046	1.11664	2.32223
959381	959390	HNE_0944	ctrA	+	DNA-binding response regulator CtrA	8.3708	7.7728	1.00901	2.68134
959391	959400	HNE_0944	ctrA	+	DNA-binding response regulator CtrA	7.77438	7.74417	0.82066	2.75316
959401	959410	HNE_0944	ctrA	+	DNA-binding response regulator CtrA	7.52325	7.20022	0.686125	2.6574
959411	959420	HNE_0944	ctrA	+	DNA-binding response regulator CtrA	6.11068	7.42925	0.484324	2.32223
959421	959430	HNE_0944	ctrA	+	DNA-binding response regulator CtrA	4.99109	7.372	0.423783	2.08283
959431	959440	HNE_0944	ctrA	+	DNA-binding response regulator CtrA	4.60394	7.30042	0.531411	2.15465
959441	959450	HNE_0944	ctrA	+	DNA-binding response regulator CtrA	4.24818	6.38429	0.780299	2.17859
959451	959460	HNE_0944	ctrA	+	DNA-binding response regulator CtrA	3.92381	6.26977	1.11664	2.48982
959461	959470	HNE_0944	ctrA	+	DNA-binding response regulator CtrA	3.67269	6.39861	1.46642	2.84892
959471	959480	HNE_0944	ctrA	+	DNA-binding response regulator CtrA	3.80871	6.42723	1.70186	3.06439
959481	959490	HNE_0944	ctrA	+	DNA-binding response regulator CtrA	3.62037	6.32703	1.92384	3.18409
959491	959500	HNE_0944	ctrA	+	DNA-binding response regulator CtrA	3.47388	5.45384	1.95075	3.11227
959501	959510	HNE_0944	ctrA	+	DNA-binding response regulator CtrA	3.56805	6.55607	1.79603	3.30379
959511	959520	HNE_0944	ctrA	+	DNA-binding response regulator CtrA	3.58898	7.0857	1.58751	3.37562
959521	959530	HNE_0944	ctrA	+	DNA-binding response regulator CtrA	3.68315	7.44357	1.32516	3.6629
959531	959540	HNE_0944	ctrA	+	DNA-binding response regulator CtrA	3.57852	6.44155	1.39243	3.4235
959541	959550	HNE_0944	ctrA	+	DNA-binding response regulator CtrA	3.44249	6.52744	1.41934	3.59108
959551	959560	HNE_0944	ctrA	+	DNA-binding response regulator CtrA	3.27507	6.44155	1.44624	3.75866
959561	959570	HNE_0944	ctrA	+	DNA-binding response regulator CtrA	3.296	5.81171	1.69513	3.73472
959571	959580	HNE_0944	ctrA	+	DNA-binding response regulator CtrA	3.34832	5.13892	1.89021	3.73472
959581	959590	HNE_0944	ctrA	+	DNA-binding response regulator CtrA	3.12859	4.02239	2.08528	3.37562
959591	959600	HNE_0944	ctrA	+	DNA-binding response regulator CtrA	3.09719	4.73812	2.14582	3.56714
959601	959610	HNE_0944	ctrA	+	DNA-binding response regulator CtrA	3.13905	3.69315	2.35435	3.32773
959611	959620	HNE_0944	ctrA	+	DNA-binding response regulator CtrA	3.37971	3.57864	2.68396	3.68684
959621	959630	HNE_0944	ctrA	+	DNA-binding response regulator CtrA	3.17044	3.29235	2.60324	3.63896
959631	959640	HNE_0944	ctrA	+	DNA-binding response regulator CtrA	3.00302	2.76271	2.73105	3.51926
959641	959650	HNE_0944	ctrA	+	DNA-binding response regulator CtrA	3.05534	2.69114	2.77141	3.71078
959651	959660	HNE_0944	ctrA	+	DNA-binding response regulator CtrA	3.02395	2.33327	2.79159	4.14171
959661	959670	HNE_0944	ctrA	+	DNA-binding response regulator CtrA	3.14951	2.00404	2.79159	4.18959
959671	959680	HNE_0944	ctrA	+	DNA-binding response regulator CtrA	2.95071	2.13287	2.72432	3.99807
959681	959690	HNE_0944	ctrA	+	DNA-binding response regulator CtrA	2.91932	1.93246	2.76468	3.7826
959691	959700	HNE_0944	ctrA	+	DNA-binding response regulator CtrA	2.80422	2.08992	2.69069	3.56714
959701	959710	HNE_0944	ctrA	+	DNA-binding response regulator CtrA	2.73097	2.00404	2.76468	3.4235
959711	959720	HNE_0944	ctrA	+	DNA-binding response regulator CtrA	3.01349	2.53368	2.90594	3.11227
959721	959730	HNE_0944	ctrA	+	DNA-binding response regulator CtrA	2.96117	2.50505	3.06066	3.16015
959731	959740	HNE_0944	ctrA	+	DNA-binding response regulator CtrA	2.9821	2.81997	3.08084	2.84892
959741	959750	HNE_0944	ctrA	+	DNA-binding response regulator CtrA	2.99256	3.23509	3.1212	2.89681
959751	959760	HNE_0944	ctrA	+	DNA-binding response regulator CtrA	3.17044	3.2494	3.43063	2.84892
959761	959770	HNE_0944	ctrA	+	DNA-binding response regulator CtrA	3.296	3.52138	3.60552	3.16015
959771	959780	HNE_0944	ctrA	+	DNA-binding response regulator CtrA	3.01349	2.80565	3.41717	3.16015
959781	959790	HNE_0944	ctrA	+	DNA-binding response regulator CtrA	2.867	3.40686	3.09429	3.18409
959791	959800	HNE_0944	ctrA	+	DNA-binding response regulator CtrA	2.79375	2.66251	2.7445	3.20803
959801	959810	HNE_0944	ctrA	+	DNA-binding response regulator CtrA	2.84607	2.76271	2.33417	3.23197
959811	959820	HNE_0944	ctrA	+	DNA-binding response regulator CtrA	2.91932	2.80565	1.93057	3.37562
959821	959830	HNE_0944	ctrA	+	DNA-binding response regulator CtrA	2.95071	2.86291	1.52024	3.11227
959831	959840	HNE_0944	ctrA	+	DNA-binding response regulator CtrA	3.17044	3.40686	1.30498	3.6629
959841	959850	HNE_0944	ctrA	+	DNA-binding response regulator CtrA	3.19137	3.00606	1.00901	3.18409
959851	959860	HNE_0944	ctrA	+	DNA-binding response regulator CtrA	3.48434	2.99174	1.04264	3.16015
959861	959870	HNE_0944	ctrA	+	DNA-binding response regulator CtrA	3.33786	3.57864	1.21754	3.25591
959871	959880	HNE_0944	ctrA	+	DNA-binding response regulator CtrA	3.31693	3.8363	1.35207	3.16015
959881	959890	HNE_0944	ctrA	+	DNA-binding response regulator CtrA	3.12859	3.85061	1.4597	3.49532
959891	959900	HNE_0944	ctrA	+	DNA-binding response regulator CtrA	3.0658	4.09396	1.70186	2.87286
959901	959910	HNE_0944	ctrA	+	DNA-binding response regulator CtrA	3.14951	3.89356	1.95748	3.27985
959911	959920	HNE_0944	ctrA	+	DNA-binding response regulator CtrA	2.64726	4.06533	2.0651	3.20803
959921	959930	HNE_0944	ctrA	+	DNA-binding response regulator CtrA	2.67865	3.95082	2.07856	3.27985
959931	959940	HNE_0944	ctrA	+	DNA-binding response regulator CtrA	2.62634	4.4232	2.07183	3.08833
959941	959950	HNE_0944	ctrA	+	DNA-binding response regulator CtrA	2.69958	4.05102	1.97093	3.08833
959951	959960	HNE_0944	ctrA	+	DNA-binding response regulator CtrA	2.85653	3.70747	1.91711	3.49532
959961	959970	HNE_0944	ctrA	+	DNA-binding response regulator CtrA	2.78329	3.75041	1.97093	3.4235
959971	959980	HNE_0944	ctrA	+	DNA-binding response regulator CtrA	3.07627	4.09396	1.8633	3.80655
959981	959990	HNE_0944	ctrA	+	DNA-binding response regulator CtrA	3.09719	3.34961	1.5606	3.83049
959991	960000	HNE_0944	ctrA	+	DNA-binding response regulator CtrA	3.13905	2.61956	1.2579	3.56714
960001	960010	HNE_0944	ctrA	+	DNA-binding response regulator CtrA	3.19137	2.83428	0.968648	2.92075
960011	960020	HNE_0944	ctrA	+	DNA-binding response regulator CtrA	3.04488	3.42118	0.645765	2.37011

## Sheet: Motility island
						Hyphomonas neptunium
						(Normalized Reads per Million unit, RPM)
						CtrA	CtrA Total input
Start	End	Feature	ID	Feature Strand	Description	(GHA-428)	(GHA-430)
226491	226500	HNE_0236	HNE_0236	+	hypothetical protein	3.12859	3.39699
226501	226510	HNE_0236	HNE_0236	+	hypothetical protein	2.89839	3.08756
226511	226520	HNE_0236	HNE_0236	+	hypothetical protein	2.82514	3.08756
226521	226530	HNE_0236	HNE_0236	+	hypothetical protein	3.07627	3.58534
226531	226540	HNE_0236	HNE_0236	+	hypothetical protein	3.23322	3.78042
226541	226550	HNE_0236	HNE_0236	+	hypothetical protein	3.26461	3.99567
226551	226560	HNE_0236	HNE_0236	+	hypothetical protein	3.12859	4.11675
226561	226570	HNE_0236	HNE_0236	+	hypothetical protein	3.03441	4.21765
226571	226580	HNE_0236	HNE_0236	+	hypothetical protein	3.23322	4.46654
226581	226590	HNE_0236	HNE_0236	+	hypothetical protein	3.11812	4.37909
226591	226600	HNE_0236	HNE_0236	+	hypothetical protein	2.96117	4.43291
226601	226610	HNE_0236	HNE_0236	+	hypothetical protein	2.71005	4.46654
226611	226620	HNE_0236	HNE_0236	+	hypothetical protein	2.78329	4.7087
226621	226630	HNE_0236	HNE_0236	+	hypothetical protein	2.77283	4.58762
226631	226640	HNE_0236	HNE_0236	+	hypothetical protein	2.76236	4.35219
226641	226650	HNE_0236	HNE_0236	+	hypothetical protein	2.51124	4.06967
226651	226660	HNE_0236	HNE_0236	+	hypothetical protein	2.54263	4.08985
226661	226670	HNE_0236	HNE_0236	+	hypothetical protein	2.62634	4.06294
226671	226680	HNE_0236	HNE_0236	+	hypothetical protein	2.55309	4.01585
226681	226690	HNE_0236	HNE_0236	+	hypothetical protein	2.56356	4.04948
226691	226700	HNE_0236	HNE_0236	+	hypothetical protein	2.36475	4.22438
226701	226710	HNE_0236	HNE_0236	+	hypothetical protein	2.43799	4.43963
226711	226720	HNE_0236	HNE_0236	+	hypothetical protein	2.38568	4.29165
226721	226730	HNE_0236	HNE_0236	+	hypothetical protein	2.4066	4.37237
226731	226740	HNE_0236	HNE_0236	+	hypothetical protein	2.49031	4.2042
226741	226750	HNE_0236	HNE_0236	+	hypothetical protein	2.65773	4.22438
226751	226760	HNE_0236	HNE_0236	+	hypothetical protein	2.82514	4.26474
226761	226770	HNE_0236	HNE_0236	+	hypothetical protein	2.92978	4.14366
226771	226780	HNE_0236	HNE_0236	+	hypothetical protein	2.83561	3.96204
226781	226790	HNE_0236	HNE_0236	+	hypothetical protein	2.82514	3.7266
226791	226800	HNE_0236	HNE_0236	+	hypothetical protein	2.77283	3.78042
226801	226810	HNE_0236	HNE_0236	+	hypothetical protein	2.55309	3.8275
226811	226820	HNE_0236	HNE_0236	+	hypothetical protein	2.47985	3.61225
226821	226830	HNE_0236	HNE_0236	+	hypothetical protein	2.37521	3.65934
226831	226840	HNE_0236	HNE_0236	+	hypothetical protein	2.31243	3.63243
226841	226850	HNE_0236	HNE_0236	+	hypothetical protein	2.28104	3.68624
226851	226860	HNE_0236	HNE_0236	+	hypothetical protein	2.47985	3.84768
226861	226870	HNE_0236	HNE_0236	+	hypothetical protein	2.53217	3.67279
226871	226880	HNE_0236	HNE_0236	+	hypothetical protein	2.5217	3.44408
226881	226890	HNE_0236	HNE_0236	+	hypothetical protein	2.5217	3.1212
226891	226900	HNE_0236	HNE_0236	+	hypothetical protein	2.49031	2.87904
226901	226910	HNE_0236	HNE_0236	+	hypothetical protein	2.49031	2.77813
226911	226920	HNE_0236	HNE_0236	+	hypothetical protein	2.36475	2.36781
226921	226930	HNE_0236	HNE_0236	+	hypothetical protein	2.37521	2.43507
226931	226940	HNE_0236	HNE_0236	+	hypothetical protein	2.51124	2.77813
226941	226950	HNE_0236	HNE_0236	+	hypothetical protein	2.66819	3.25573
226951	226960	HNE_0236	HNE_0236	+	hypothetical protein	2.78329	3.51135
226961	226970	HNE_0236	HNE_0236	+	hypothetical protein	2.90885	3.61225
226971	226980	HNE_0236	HNE_0236	+	hypothetical protein	2.95071	3.53825
226981	226990	HNE_0236	HNE_0236	+	hypothetical protein	2.77283	3.17501
226991	227000	HNE_0236	HNE_0236	+	hypothetical protein	2.77283	2.71759
227001	227010	HNE_0236	HNE_0236	+	hypothetical protein	2.78329	2.09201
227011	227020	HNE_0236	HNE_0236	+	hypothetical protein	2.77283	1.67495
227021	227030	HNE_0236	HNE_0236	+	hypothetical protein	3.04488	1.37898
227031	227040	HNE_0236	HNE_0236	+	hypothetical protein	3.10766	1.49333
227041	227050	HNE_0236	HNE_0236	+	hypothetical protein	3.24368	1.8633
227051	227060	HNE_0236	HNE_0236	+	hypothetical protein	3.22276	2.34762
227061	227070	HNE_0236	HNE_0236	+	hypothetical protein	3.05534	3.16156
227071	227080	HNE_0236	HNE_0236	+	hypothetical protein	3.0658	3.74678
227081	227090	HNE_0236	HNE_0236	+	hypothetical protein	3.00302	4.16384
227091	227100	HNE_0236	HNE_0236	+	hypothetical protein	3.01349	4.25801
227101	227110	HNE_0236	HNE_0236	+	hypothetical protein	3.15998	3.76024
227111	227120	HNE_0236	HNE_0236	+	hypothetical protein	3.0658	3.24901
227121	227130	HNE_0236	HNE_0236	+	hypothetical protein	3.15998	2.46198
227131	227140	HNE_0236	HNE_0236	+	hypothetical protein	3.27507	2.0651
227141	227150	HNE_0236	HNE_0236	+	hypothetical protein	3.15998	1.95748
227151	227160	HNE_0236	HNE_0236	+	hypothetical protein	3.17044	2.19964
227161	227170	HNE_0236	HNE_0236	+	hypothetical protein	2.99256	2.9463
227171	227180	HNE_0236	HNE_0236	+	hypothetical protein	3.24368	3.80732
227181	227190	HNE_0236	HNE_0236	+	hypothetical protein	3.14951	4.3051
227191	227200	HNE_0236	HNE_0236	+	hypothetical protein	2.9821	4.74234
227201	227210	HNE_0236	HNE_0236	+	hypothetical protein	2.7519	4.7087
227211	227220	HNE_0236	HNE_0236	+	hypothetical protein	2.80422	4.52036
227221	227230	HNE_0236	HNE_0236	+	hypothetical protein	2.7519	4.63471
227231	227240	HNE_0236	HNE_0236	+	hypothetical protein	2.6368	4.64144
227241	227250	HNE_0236	HNE_0236	+	hypothetical protein	2.60541	4.64816
227251	227260	HNE_0236	HNE_0236	+	hypothetical protein	2.68912	4.56744
227261	227270	HNE_0236	HNE_0236	+	hypothetical protein	2.64726	4.63471
227271	227280	HNE_0236	HNE_0236	+	hypothetical protein	2.50078	4.68852
227281	227290	HNE_0236	HNE_0236	+	hypothetical protein	2.62634	4.58762
227291	227300	HNE_0236	HNE_0236	+	hypothetical protein	2.49031	4.53381
227301	227310	HNE_0236	HNE_0236	+	hypothetical protein	2.44846	4.44636
227311	227320	HNE_0236	HNE_0236	+	hypothetical protein	2.28104	4.41945
227321	227330	HNE_0236	HNE_0236	+	hypothetical protein	2.38568	4.33201
227331	227340	HNE_0236	HNE_0236	+	hypothetical protein	2.50078	4.36564
227341	227350	HNE_0236	HNE_0236	+	hypothetical protein	2.45892	4.37237
227351	227360	HNE_0236	HNE_0236	+	hypothetical protein	2.68912	4.34546
227361	227370	HNE_0236	HNE_0236	+	hypothetical protein	2.79375	4.44636
227371	227380	HNE_0236	HNE_0236	+	hypothetical protein	2.79375	4.43963
227381	227390	HNE_0236	HNE_0236	+	hypothetical protein	2.91932	4.54054
227391	227400	HNE_0236	HNE_0236	+	hypothetical protein	2.80422	4.6818
227401	227410	HNE_0236	HNE_0236	+	hypothetical protein	2.6368	4.39255
227411	227420	HNE_0236	HNE_0236	+	hypothetical protein	2.43799	4.23111
227421	227430	HNE_0236	HNE_0236	+	hypothetical protein	2.51124	3.9284
227431	227440	HNE_0236	HNE_0236	+	hypothetical protein	2.44846	3.61225
227441	227450	HNE_0236	HNE_0236	+	hypothetical protein	2.44846	3.66606
227451	227460	HNE_0236	HNE_0236	+	hypothetical protein	2.54263	3.67952
227461	227470	HNE_0236	HNE_0236	+	hypothetical protein	2.76236	3.93513
227471	227480	HNE_0236	HNE_0236	+	hypothetical protein	2.84607	4.2042
227481	227490	HNE_0236	HNE_0236	+	hypothetical protein	2.7519	4.45309
227491	227500	HNE_0236	HNE_0236	+	hypothetical protein	2.66819	4.60108
227501	227510	HNE_0236	HNE_0236	+	hypothetical protein	2.72051	4.48672
227511	227520	HNE_0236	HNE_0236	+	hypothetical protein	2.56356	4.23783
227521	227530	HNE_0236	HNE_0236	+	hypothetical protein	2.45892	3.84768
227531	227540	HNE_0236	HNE_0236	+	hypothetical protein	2.36475	3.51135
227541	227550	HNE_0236	HNE_0236	+	hypothetical protein	2.43799	3.51135
227551	227560	HNE_0236	HNE_0236	+	hypothetical protein	2.53217	3.51135
227561	227570	HNE_0236	HNE_0236	+	hypothetical protein	2.44846	3.32973
227571	227580	HNE_0236	HNE_0236	+	hypothetical protein	2.45892	3.37681
227581	227590	HNE_0236	HNE_0236	+	hypothetical protein	2.36475	3.45753
227591	227600	HNE_0236	HNE_0236	+	hypothetical protein	2.5217	3.8006
227601	227610	HNE_0236	HNE_0236	+	hypothetical protein	2.34382	4.02258
227611	227620	HNE_0236	HNE_0236	+	hypothetical protein	2.21826	4.24456
227621	227630	HNE_0236	HNE_0236	+	hypothetical protein	2.15548	4.17729
227631	227640	HNE_0236	HNE_0236	+	hypothetical protein	2.11363	3.87459
227641	227650	HNE_0236	HNE_0236	+	hypothetical protein	2.21826	3.30282
227651	227660	HNE_0236	HNE_0236	+	hypothetical protein	2.14502	2.44853
227661	227670	HNE_0236	HNE_0236	+	hypothetical protein	2.46939	1.85657
227671	227680	HNE_0236	HNE_0236	+	hypothetical protein	2.47985	1.2848
227681	227690	HNE_0236	HNE_0236	+	hypothetical protein	2.38568	1.14354
227691	227700	HNE_0236	HNE_0236	+	hypothetical protein	2.45892	1.47988
227701	227710	HNE_0236	HNE_0236	+	hypothetical protein	2.33336	2.03147
227711	227720	HNE_0236	HNE_0236	+	hypothetical protein	2.39614	2.53597
227721	227730	HNE_0236	HNE_0236	+	hypothetical protein	2.15548	2.97321
227731	227740	HNE_0236	HNE_0236	+	hypothetical protein	2.24965	3.35663
227741	227750	HNE_0236	HNE_0236	+	hypothetical protein	2.37521	3.55171
227751	227760	HNE_0236	HNE_0236	+	hypothetical protein	2.30197	3.63916
227761	227770	HNE_0236	HNE_0236	+	hypothetical protein	2.31243	3.47099
227771	227780	HNE_0236	HNE_0236	+	hypothetical protein	2.28104	3.37009
227781	227790	HNE_0236	HNE_0236	+	hypothetical protein	2.30197	3.33645
227791	227800	HNE_0236	HNE_0236	+	hypothetical protein	2.54263	3.323
227801	227810	HNE_0236	HNE_0236	+	hypothetical protein	2.53217	3.21537
227811	227820	HNE_0236	HNE_0236	+	hypothetical protein	2.46939	2.98666
227821	227830	HNE_0236	HNE_0236	+	hypothetical protein	2.59495	3.2221
227831	227840	HNE_0236	HNE_0236	+	hypothetical protein	2.58448	3.43063
227841	227850	HNE_0236	HNE_0236	+	hypothetical protein	2.31243	3.25573
227851	227860	HNE_0236	HNE_0236	+	hypothetical protein	2.05085	3.16828
227861	227870	HNE_0236	HNE_0236	+	hypothetical protein	1.99853	3.20864
227871	227880	HNE_0236	HNE_0236	+	hypothetical protein	1.90436	3.39699
227881	227890	HNE_0236	HNE_0236	+	hypothetical protein	1.85204	3.37681
227891	227900	HNE_0236	HNE_0236	+	hypothetical protein	1.70555	3.18846
227901	227910	HNE_0236	HNE_0236	+	hypothetical protein	1.94621	3.26919
227911	227920	HNE_0236	HNE_0236	+	hypothetical protein	1.89389	3.20864
227921	227930	HNE_0236	HNE_0236	+	hypothetical protein	1.91482	3.02702
227931	227940	HNE_0236	HNE_0236	+	hypothetical protein	1.96714	2.91267
227941	227950	HNE_0236	HNE_0236	+	hypothetical protein	1.78926	2.61669
227951	227960	HNE_0236	HNE_0236	+	hypothetical protein	1.68462	2.5427
227961	227970	HNE_0236	HNE_0236	+	hypothetical protein	1.72648	2.59651
227971	227980	HNE_0236	HNE_0236	+	hypothetical protein	1.98806	2.76468
227981	227990	HNE_0236	HNE_0236	+	hypothetical protein	1.9776	2.72432
227991	228000	HNE_0236	HNE_0236	+	hypothetical protein	2.23919	2.9463
228001	228010	HNE_0236	HNE_0236	+	hypothetical protein	2.35429	3.25573
228011	228020	HNE_0236	HNE_0236	+	hypothetical protein	2.30197	3.26246
228021	228030	HNE_0236	HNE_0236	+	hypothetical protein	2.13455	3.03375
228031	228040	HNE_0236	HNE_0236	+	hypothetical protein	1.84158	2.67051
228041	228050	HNE_0236	HNE_0236	+	hypothetical protein	1.90436	2.30054
228051	228060	HNE_0236	HNE_0236	+	hypothetical protein	1.70555	1.70186
228061	228070	HNE_0237	HNE_0237	-	acyl-CoA dehydrogenase family protein	1.84158	1.88348
228071	228080	HNE_0237	HNE_0237	-	acyl-CoA dehydrogenase family protein	2.00899	1.95748
228081	228090	HNE_0237	HNE_0237	-	acyl-CoA dehydrogenase family protein	2.17641	2.17273
228091	228100	HNE_0237	HNE_0237	-	acyl-CoA dehydrogenase family protein	2.46939	2.8185
228101	228110	HNE_0237	HNE_0237	-	acyl-CoA dehydrogenase family protein	2.47985	3.24228
228111	228120	HNE_0237	HNE_0237	-	acyl-CoA dehydrogenase family protein	2.66819	3.53825
228121	228130	HNE_0237	HNE_0237	-	acyl-CoA dehydrogenase family protein	2.67865	3.43735
228131	228140	HNE_0237	HNE_0237	-	acyl-CoA dehydrogenase family protein	2.51124	3.36336
228141	228150	HNE_0237	HNE_0237	-	acyl-CoA dehydrogenase family protein	2.47985	3.59207
228151	228160	HNE_0237	HNE_0237	-	acyl-CoA dehydrogenase family protein	2.21826	3.38354
228161	228170	HNE_0237	HNE_0237	-	acyl-CoA dehydrogenase family protein	2.13455	3.22883
228171	228180	HNE_0237	HNE_0237	-	acyl-CoA dehydrogenase family protein	2.17641	3.26246
228181	228190	HNE_0237	HNE_0237	-	acyl-CoA dehydrogenase family protein	2.28104	3.10102
228191	228200	HNE_0237	HNE_0237	-	acyl-CoA dehydrogenase family protein	2.4066	3.21537
228201	228210	HNE_0237	HNE_0237	-	acyl-CoA dehydrogenase family protein	2.47985	3.16828
228211	228220	HNE_0237	HNE_0237	-	acyl-CoA dehydrogenase family protein	2.76236	3.5248
228221	228230	HNE_0237	HNE_0237	-	acyl-CoA dehydrogenase family protein	2.76236	3.93513
228231	228240	HNE_0237	HNE_0237	-	acyl-CoA dehydrogenase family protein	2.51124	4.04276
228241	228250	HNE_0237	HNE_0237	-	acyl-CoA dehydrogenase family protein	2.44846	4.08312
228251	228260	HNE_0237	HNE_0237	-	acyl-CoA dehydrogenase family protein	2.4066	4.12348
228261	228270	HNE_0237	HNE_0237	-	acyl-CoA dehydrogenase family protein	2.30197	4.15711
228271	228280	HNE_0237	HNE_0237	-	acyl-CoA dehydrogenase family protein	2.23919	3.94186
228281	228290	HNE_0237	HNE_0237	-	acyl-CoA dehydrogenase family protein	2.34382	3.76696
228291	228300	HNE_0237	HNE_0237	-	acyl-CoA dehydrogenase family protein	2.67865	3.82078
228301	228310	HNE_0237	HNE_0237	-	acyl-CoA dehydrogenase family protein	2.66819	4.03603
228311	228320	HNE_0237	HNE_0237	-	acyl-CoA dehydrogenase family protein	2.5217	3.94186
228321	228330	HNE_0237	HNE_0237	-	acyl-CoA dehydrogenase family protein	2.57402	4.04276
228331	228340	HNE_0237	HNE_0237	-	acyl-CoA dehydrogenase family protein	2.45892	4.22438
228341	228350	HNE_0237	HNE_0237	-	acyl-CoA dehydrogenase family protein	2.35429	4.39255
228351	228360	HNE_0237	HNE_0237	-	acyl-CoA dehydrogenase family protein	2.26012	4.31855
228361	228370	HNE_0237	HNE_0237	-	acyl-CoA dehydrogenase family protein	2.26012	4.17057
228371	228380	HNE_0237	HNE_0237	-	acyl-CoA dehydrogenase family protein	2.35429	3.90822
228381	228390	HNE_0237	HNE_0237	-	acyl-CoA dehydrogenase family protein	2.41707	3.57861
228391	228400	HNE_0237	HNE_0237	-	acyl-CoA dehydrogenase family protein	2.58448	3.15483
228401	228410	HNE_0237	HNE_0237	-	acyl-CoA dehydrogenase family protein	2.57402	2.98666
228411	228420	HNE_0237	HNE_0237	-	acyl-CoA dehydrogenase family protein	2.46939	2.97994
228421	228430	HNE_0237	HNE_0237	-	acyl-CoA dehydrogenase family protein	2.5217	3.20864
228431	228440	HNE_0237	HNE_0237	-	acyl-CoA dehydrogenase family protein	2.57402	3.39027
228441	228450	HNE_0237	HNE_0237	-	acyl-CoA dehydrogenase family protein	2.5217	3.60552
228451	228460	HNE_0237	HNE_0237	-	acyl-CoA dehydrogenase family protein	2.47985	3.80732
228461	228470	HNE_0237	HNE_0237	-	acyl-CoA dehydrogenase family protein	2.42753	3.61897
228471	228480	HNE_0237	HNE_0237	-	acyl-CoA dehydrogenase family protein	2.6368	3.59879
228481	228490	HNE_0237	HNE_0237	-	acyl-CoA dehydrogenase family protein	2.45892	3.49117
228491	228500	HNE_0237	HNE_0237	-	acyl-CoA dehydrogenase family protein	2.26012	3.25573
228501	228510	HNE_0237	HNE_0237	-	acyl-CoA dehydrogenase family protein	2.13455	3.06066
228511	228520	HNE_0237	HNE_0237	-	acyl-CoA dehydrogenase family protein	1.90436	2.92612
228521	228530	HNE_0237	HNE_0237	-	acyl-CoA dehydrogenase family protein	1.76833	2.73105
228531	228540	HNE_0237	HNE_0237	-	acyl-CoA dehydrogenase family protein	1.50674	2.52252
228541	228550	HNE_0237	HNE_0237	-	acyl-CoA dehydrogenase family protein	1.47535	2.29381
228551	228560	HNE_0237	HNE_0237	-	acyl-CoA dehydrogenase family protein	1.41257	2.15928
228561	228570	HNE_0237	HNE_0237	-	acyl-CoA dehydrogenase family protein	1.29747	2.09201
228571	228580	HNE_0237	HNE_0237	-	acyl-CoA dehydrogenase family protein	1.29747	2.12564
228581	228590	HNE_0237	HNE_0237	-	acyl-CoA dehydrogenase family protein	1.4335	2.42162
228591	228600	HNE_0237	HNE_0237	-	acyl-CoA dehydrogenase family protein	1.52767	2.7445
228601	228610	HNE_0237	HNE_0237	-	acyl-CoA dehydrogenase family protein	1.65323	2.89249
228611	228620	HNE_0237	HNE_0237	-	acyl-CoA dehydrogenase family protein	1.73694	2.82522
228621	228630	HNE_0237	HNE_0237	-	acyl-CoA dehydrogenase family protein	1.83111	2.58306
228631	228640	HNE_0237	HNE_0237	-	acyl-CoA dehydrogenase family protein	1.98806	2.35435
228641	228650	HNE_0237	HNE_0237	-	acyl-CoA dehydrogenase family protein	2.26012	2.19964
228651	228660	HNE_0237	HNE_0237	-	acyl-CoA dehydrogenase family protein	2.38568	2.17946
228661	228670	HNE_0237	HNE_0237	-	acyl-CoA dehydrogenase family protein	2.49031	2.52925
228671	228680	HNE_0237	HNE_0237	-	acyl-CoA dehydrogenase family protein	2.84607	2.9463
228681	228690	HNE_0237	HNE_0237	-	acyl-CoA dehydrogenase family protein	3.14951	3.53825
228691	228700	HNE_0237	HNE_0237	-	acyl-CoA dehydrogenase family protein	2.94024	3.73333
228701	228710	HNE_0237	HNE_0237	-	acyl-CoA dehydrogenase family protein	2.89839	3.78042
228711	228720	HNE_0237	HNE_0237	-	acyl-CoA dehydrogenase family protein	3.05534	3.65261
228721	228730	HNE_0237	HNE_0237	-	acyl-CoA dehydrogenase family protein	3.21229	3.7266
228731	228740	HNE_0237	HNE_0237	-	acyl-CoA dehydrogenase family protein	3.19137	3.49789
228741	228750	HNE_0237	HNE_0237	-	acyl-CoA dehydrogenase family protein	3.22276	3.46426
228751	228760	HNE_0237	HNE_0237	-	acyl-CoA dehydrogenase family protein	3.44249	3.53825
228761	228770	HNE_0237	HNE_0237	-	acyl-CoA dehydrogenase family protein	3.42156	3.323
228771	228780	HNE_0237	HNE_0237	-	acyl-CoA dehydrogenase family protein	3.37971	3.19519
228781	228790	HNE_0237	HNE_0237	-	acyl-CoA dehydrogenase family protein	3.20183	2.81177
228791	228800	HNE_0237	HNE_0237	-	acyl-CoA dehydrogenase family protein	2.76236	2.49561
228801	228810	HNE_0237	HNE_0237	-	acyl-CoA dehydrogenase family protein	2.60541	2.09201
228811	228820	HNE_0237	HNE_0237	-	acyl-CoA dehydrogenase family protein	2.54263	1.82967
228821	228830	HNE_0237	HNE_0237	-	acyl-CoA dehydrogenase family protein	2.5217	1.83639
228831	228840	HNE_0237	HNE_0237	-	acyl-CoA dehydrogenase family protein	2.49031	1.98438
228841	228850	HNE_0237	HNE_0237	-	acyl-CoA dehydrogenase family protein	2.44846	2.37453
228851	228860	HNE_0237	HNE_0237	-	acyl-CoA dehydrogenase family protein	2.71005	2.69069
228861	228870	HNE_0237	HNE_0237	-	acyl-CoA dehydrogenase family protein	2.89839	3.04048
228871	228880	HNE_0237	HNE_0237	-	acyl-CoA dehydrogenase family protein	2.80422	3.13465
228881	228890	HNE_0237	HNE_0237	-	acyl-CoA dehydrogenase family protein	3.04488	2.90594
228891	228900	HNE_0237	HNE_0237	-	acyl-CoA dehydrogenase family protein	2.95071	2.49561
228901	228910	HNE_0237	HNE_0237	-	acyl-CoA dehydrogenase family protein	2.88792	1.8633
228911	228920	HNE_0237	HNE_0237	-	acyl-CoA dehydrogenase family protein	2.81468	1.57405
228921	228930	HNE_0237	HNE_0237	-	acyl-CoA dehydrogenase family protein	2.51124	1.2579
228931	228940	HNE_0237	HNE_0237	-	acyl-CoA dehydrogenase family protein	2.4066	1.3588
228941	228950	HNE_0237	HNE_0237	-	acyl-CoA dehydrogenase family protein	1.96714	1.72204
228951	228960	HNE_0237	HNE_0237	-	acyl-CoA dehydrogenase family protein	2.07177	2.24672
228961	228970	HNE_0237	HNE_0237	-	acyl-CoA dehydrogenase family protein	2.11363	2.71087
228971	228980	HNE_0237	HNE_0237	-	acyl-CoA dehydrogenase family protein	1.92528	2.83868
228981	228990	HNE_0237	HNE_0237	-	acyl-CoA dehydrogenase family protein	2.02992	3.19519
228991	229000	HNE_0237	HNE_0237	-	acyl-CoA dehydrogenase family protein	2.14502	3.26246
229001	229010	HNE_0237	HNE_0237	-	acyl-CoA dehydrogenase family protein	2.34382	3.2221
229011	229020	HNE_0237	HNE_0237	-	acyl-CoA dehydrogenase family protein	2.12409	2.79832
229021	229030	HNE_0237	HNE_0237	-	acyl-CoA dehydrogenase family protein	1.84158	2.60997
229031	229040	HNE_0237	HNE_0237	-	acyl-CoA dehydrogenase family protein	2.12409	2.77141
229041	229050	HNE_0237	HNE_0237	-	acyl-CoA dehydrogenase family protein	2.37521	2.89249
229051	229060	HNE_0237	HNE_0237	-	acyl-CoA dehydrogenase family protein	2.4066	3.21537
229061	229070	HNE_0237	HNE_0237	-	acyl-CoA dehydrogenase family protein	2.2078	3.2221
229071	229080	HNE_0237	HNE_0237	-	acyl-CoA dehydrogenase family protein	2.44846	3.71988
229081	229090	HNE_0237	HNE_0237	-	acyl-CoA dehydrogenase family protein	2.87746	4.21765
229091	229100	HNE_0237	HNE_0237	-	acyl-CoA dehydrogenase family protein	2.77283	4.24456
229101	229110	HNE_0237	HNE_0237	-	acyl-CoA dehydrogenase family protein	2.58448	4.12348
229111	229120	HNE_0237	HNE_0237	-	acyl-CoA dehydrogenase family protein	2.7519	3.8275
229121	229130	HNE_0237	HNE_0237	-	acyl-CoA dehydrogenase family protein	3.05534	3.96876
229131	229140	HNE_0237	HNE_0237	-	acyl-CoA dehydrogenase family protein	3.03441	3.74678
229141	229150	HNE_0237	HNE_0237	-	acyl-CoA dehydrogenase family protein	3.01349	3.61225
229151	229160	HNE_0237	HNE_0237	-	acyl-CoA dehydrogenase family protein	3.15998	3.56516
229161	229170	HNE_0237	HNE_0237	-	acyl-CoA dehydrogenase family protein	3.24368	3.96204
229171	229180	HNE_0237	HNE_0237	-	acyl-CoA dehydrogenase family protein	3.12859	4.13693
229181	229190	HNE_0237	HNE_0237	-	acyl-CoA dehydrogenase family protein	2.83561	4.31183
229191	229200	HNE_0237	HNE_0237	-	acyl-CoA dehydrogenase family protein	2.73097	4.52036
229201	229210	HNE_0237	HNE_0237	-	acyl-CoA dehydrogenase family protein	2.61587	4.64144
229211	229220	HNE_0237	HNE_0237	-	acyl-CoA dehydrogenase family protein	2.49031	4.74906
229221	229230	HNE_0237	HNE_0237	-	acyl-CoA dehydrogenase family protein	2.83561	4.56072
229231	229240	HNE_0237	HNE_0237	-	acyl-CoA dehydrogenase family protein	2.78329	4.35219
229241	229250	HNE_0237	HNE_0237	-	acyl-CoA dehydrogenase family protein	2.87746	4.04948
229251	229260	HNE_0237	HNE_0237	-	acyl-CoA dehydrogenase family protein	3.01349	3.94858
229261	229270	HNE_0237	HNE_0237	-	acyl-CoA dehydrogenase family protein	2.92978	3.61225
229271	229280	HNE_0237	HNE_0237	-	acyl-CoA dehydrogenase family protein	3.01349	3.59207
229281	229290	HNE_0237	HNE_0237	-	acyl-CoA dehydrogenase family protein	2.81468	3.45081
229291	229300	HNE_0238	HNE_0238	-	conserved hypothetical protein	2.71005	3.71988
229301	229310	HNE_0238	HNE_0238	-	conserved hypothetical protein	2.91932	3.94858
229311	229320	HNE_0238	HNE_0238	-	conserved hypothetical protein	2.90885	3.70642
229321	229330	HNE_0238	HNE_0238	-	conserved hypothetical protein	2.9821	3.82078
229331	229340	HNE_0238	HNE_0238	-	conserved hypothetical protein	2.88792	3.78714
229341	229350	HNE_0238	HNE_0238	-	conserved hypothetical protein	2.76236	3.80732
229351	229360	HNE_0238	HNE_0238	-	conserved hypothetical protein	2.78329	3.63243
229361	229370	HNE_0238	HNE_0238	-	conserved hypothetical protein	2.69958	3.71315
229371	229380	HNE_0238	HNE_0238	-	conserved hypothetical protein	2.47985	4.02258
229381	229390	HNE_0238	HNE_0238	-	conserved hypothetical protein	2.50078	4.21765
229391	229400	HNE_0238	HNE_0238	-	conserved hypothetical protein	2.57402	4.31855
229401	229410	HNE_0238	HNE_0238	-	conserved hypothetical protein	2.62634	4.39927
229411	229420	HNE_0238	HNE_0238	-	conserved hypothetical protein	2.37521	4.11003
229421	229430	HNE_0238	HNE_0238	-	conserved hypothetical protein	2.26012	3.6997
229431	229440	HNE_0238	HNE_0238	-	conserved hypothetical protein	2.29151	3.1481
229441	229450	HNE_0238	HNE_0238	-	conserved hypothetical protein	2.2078	2.5427
229451	229460	HNE_0238	HNE_0238	-	conserved hypothetical protein	2.10316	2.40817
229461	229470	HNE_0238	HNE_0238	-	conserved hypothetical protein	2.12409	2.48216
229471	229480	HNE_0238	HNE_0238	-	conserved hypothetical protein	2.51124	2.86558
229481	229490	HNE_0238	HNE_0238	-	conserved hypothetical protein	2.66819	3.21537
229491	229500	HNE_0238	HNE_0238	-	conserved hypothetical protein	2.68912	3.77369
229501	229510	HNE_0238	HNE_0238	-	conserved hypothetical protein	2.6368	4.19075
229511	229520	HNE_0238	HNE_0238	-	conserved hypothetical protein	2.61587	4.41945
229521	229530	HNE_0238	HNE_0238	-	conserved hypothetical protein	2.62634	4.39927
229531	229540	HNE_0238	HNE_0238	-	conserved hypothetical protein	2.21826	4.0293
229541	229550	HNE_0238	HNE_0238	-	conserved hypothetical protein	2.02992	3.86114
229551	229560	HNE_0238	HNE_0238	-	conserved hypothetical protein	2.18687	3.74006
229561	229570	HNE_0238	HNE_0238	-	conserved hypothetical protein	2.31243	3.78042
229571	229580	HNE_0238	HNE_0238	-	conserved hypothetical protein	2.44846	3.57861
229581	229590	HNE_0238	HNE_0238	-	conserved hypothetical protein	2.42753	3.30955
229591	229600	HNE_0238	HNE_0238	-	conserved hypothetical protein	2.64726	3.44408
229601	229610	HNE_0238	HNE_0238	-	conserved hypothetical protein	2.867	3.51807
229611	229620	HNE_0238	HNE_0238	-	conserved hypothetical protein	2.7519	3.30955
229621	229630	HNE_0238	HNE_0238	-	conserved hypothetical protein	2.6368	3.41717
229631	229640	HNE_0238	HNE_0238	-	conserved hypothetical protein	2.56356	3.34318
229641	229650	HNE_0238	HNE_0238	-	conserved hypothetical protein	2.47985	3.35663
229651	229660	HNE_0238	HNE_0238	-	conserved hypothetical protein	2.47985	3.37009
229661	229670	HNE_0238	HNE_0238	-	conserved hypothetical protein	2.43799	3.08756
229671	229680	HNE_0238	HNE_0238	-	conserved hypothetical protein	2.71005	3.16156
229681	229690	HNE_0238	HNE_0238	-	conserved hypothetical protein	2.83561	2.95976
229691	229700	HNE_0238	HNE_0238	-	conserved hypothetical protein	2.84607	2.96648
229701	229710	HNE_0238	HNE_0238	-	conserved hypothetical protein	3.17044	3.1212
229711	229720	HNE_0238	HNE_0238	-	conserved hypothetical protein	3.34832	3.2221
229721	229730	HNE_0238	HNE_0238	-	conserved hypothetical protein	3.34832	3.26919
229731	229740	HNE_0238	HNE_0238	-	conserved hypothetical protein	3.31693	3.36336
229741	229750	HNE_0238	HNE_0238	-	conserved hypothetical protein	3.296	3.57861
229751	229760	HNE_0238	HNE_0238	-	conserved hypothetical protein	3.47388	3.65261
229761	229770	HNE_0238	HNE_0238	-	conserved hypothetical protein	3.1809	3.5248
229771	229780	HNE_0238	HNE_0238	-	conserved hypothetical protein	2.95071	3.27591
229781	229790	HNE_0238	HNE_0238	-	conserved hypothetical protein	2.79375	3.47099
229791	229800	HNE_0238	HNE_0238	-	conserved hypothetical protein	2.58448	3.49117
229801	229810	HNE_0238	HNE_0238	-	conserved hypothetical protein	2.51124	3.57861
229811	229820	HNE_0238	HNE_0238	-	conserved hypothetical protein	2.45892	3.61225
229821	229830	HNE_0238	HNE_0238	-	conserved hypothetical protein	2.39614	3.78714
229831	229840	HNE_0238	HNE_0238	-	conserved hypothetical protein	2.61587	4.04276
229841	229850	HNE_0238	HNE_0238	-	conserved hypothetical protein	2.58448	3.96204
229851	229860	HNE_0238	HNE_0238	-	conserved hypothetical protein	2.64726	4.03603
229861	229870	HNE_0238	HNE_0238	-	conserved hypothetical protein	2.76236	3.96204
229871	229880	HNE_0238	HNE_0238	-	conserved hypothetical protein	2.71005	4.15711
229881	229890	HNE_0238	HNE_0238	-	conserved hypothetical protein	2.68912	4.04948
229891	229900	HNE_0238	HNE_0238	-	conserved hypothetical protein	2.77283	4.13021
229901	229910	HNE_0238	HNE_0238	-	conserved hypothetical protein	2.65773	4.33201
229911	229920	HNE_0238	HNE_0238	-	conserved hypothetical protein	2.57402	4.13693
229921	229930	HNE_0238	HNE_0238	-	conserved hypothetical protein	2.4066	3.88132
229931	229940	HNE_0238	HNE_0238	-	conserved hypothetical protein	2.38568	3.74678
229941	229950	HNE_0238	HNE_0238	-	conserved hypothetical protein	2.41707	4.02258
229951	229960	HNE_0238	HNE_0238	-	conserved hypothetical protein	2.30197	3.94858
229961	229970	HNE_0238	HNE_0238	-	conserved hypothetical protein	2.30197	3.67952
229971	229980	HNE_0238	HNE_0238	-	conserved hypothetical protein	2.16594	3.46426
229981	229990	HNE_0238	HNE_0238	-	conserved hypothetical protein	2.22872	3.08756
229991	230000	HNE_0238	HNE_0238	-	conserved hypothetical protein	2.10316	2.93958
230001	230010	HNE_0238	HNE_0238	-	conserved hypothetical protein	2.11363	2.68396
230011	230020	HNE_0238	HNE_0238	-	conserved hypothetical protein	2.23919	2.81177
230021	230030	HNE_0238	HNE_0238	-	conserved hypothetical protein	2.3229	2.83195
230031	230040	HNE_0238	HNE_0238	-	conserved hypothetical protein	2.49031	3.20192
230041	230050	HNE_0238	HNE_0238	-	conserved hypothetical protein	2.33336	3.59879
230051	230060	HNE_0238	HNE_0238	-	conserved hypothetical protein	2.59495	3.74678
230061	230070	HNE_0238	HNE_0238	-	conserved hypothetical protein	2.46939	3.55171
230071	230080	HNE_0238	HNE_0238	-	conserved hypothetical protein	2.47985	3.27591
230081	230090	HNE_0238	HNE_0238	-	conserved hypothetical protein	2.34382	3.16156
230091	230100	HNE_0238	HNE_0238	-	conserved hypothetical protein	2.64726	2.88576
230101	230110	HNE_0238	HNE_0238	-	conserved hypothetical protein	2.73097	2.83868
230111	230120	HNE_0238	HNE_0238	-	conserved hypothetical protein	2.65773	2.77141
230121	230130	HNE_0238	HNE_0238	-	conserved hypothetical protein	2.80422	3.00012
230131	230140	HNE_0238	HNE_0238	-	conserved hypothetical protein	2.82514	3.10774
230141	230150	HNE_0238	HNE_0238	-	conserved hypothetical protein	3.03441	3.18846
230151	230160	HNE_0238	HNE_0238	-	conserved hypothetical protein	2.74144	2.95976
230161	230170	HNE_0238	HNE_0238	-	conserved hypothetical protein	2.79375	2.43507
230171	230180	HNE_0238	HNE_0238	-	conserved hypothetical protein	2.79375	1.80949
230181	230190	HNE_0238	HNE_0238	-	conserved hypothetical protein	2.92978	1.26462
230191	230200	HNE_0238	HNE_0238	-	conserved hypothetical protein	2.87746	0.739939
230201	230210	HNE_0238	HNE_0238	-	conserved hypothetical protein	2.90885	0.645765
230211	230220					3.14951	1.04264
230221	230230					3.02395	1.4597
230231	230240					3.17044	2.166
230241	230250					3.15998	2.6436
230251	230260					3.1809	3.25573
230261	230270					3.14951	3.33645
230271	230280					3.33786	2.97994
230281	230290					3.54712	2.72432
230291	230300					3.44249	2.24
230301	230310					3.4111	2.22654
230311	230320					3.19137	2.18618
230321	230330					3.23322	2.44853
230331	230340					2.91932	2.85213
230341	230350	HNE_0239	HNE_0239	-	conserved hypothetical protein	2.81468	3.20864
230351	230360	HNE_0239	HNE_0239	-	conserved hypothetical protein	2.84607	3.36336
230361	230370	HNE_0239	HNE_0239	-	conserved hypothetical protein	2.94024	3.35663
230371	230380	HNE_0239	HNE_0239	-	conserved hypothetical protein	3.01349	2.95976
230381	230390	HNE_0239	HNE_0239	-	conserved hypothetical protein	3.1809	2.60997
230391	230400	HNE_0239	HNE_0239	-	conserved hypothetical protein	3.1809	2.15255
230401	230410	HNE_0239	HNE_0239	-	conserved hypothetical protein	3.11812	1.61441
230411	230420	HNE_0239	HNE_0239	-	conserved hypothetical protein	3.11812	1.50006
230421	230430	HNE_0239	HNE_0239	-	conserved hypothetical protein	3.04488	1.4866
230431	230440	HNE_0239	HNE_0239	-	conserved hypothetical protein	3.07627	1.79603
230441	230450	HNE_0239	HNE_0239	-	conserved hypothetical protein	2.82514	2.15255
230451	230460	HNE_0239	HNE_0239	-	conserved hypothetical protein	2.82514	2.68396
230461	230470	HNE_0239	HNE_0239	-	conserved hypothetical protein	2.96117	3.16828
230471	230480	HNE_0239	HNE_0239	-	conserved hypothetical protein	2.79375	3.23555
230481	230490	HNE_0239	HNE_0239	-	conserved hypothetical protein	2.62634	2.90594
230491	230500	HNE_0239	HNE_0239	-	conserved hypothetical protein	2.47985	2.70414
230501	230510	HNE_0239	HNE_0239	-	conserved hypothetical protein	2.74144	2.58979
230511	230520	HNE_0239	HNE_0239	-	conserved hypothetical protein	3.01349	2.32072
230521	230530	HNE_0239	HNE_0239	-	conserved hypothetical protein	2.91932	1.97093
230531	230540	HNE_0239	HNE_0239	-	conserved hypothetical protein	3.03441	1.79603
230541	230550	HNE_0239	HNE_0239	-	conserved hypothetical protein	3.05534	1.79603
230551	230560	HNE_0239	HNE_0239	-	conserved hypothetical protein	3.21229	1.70186
230561	230570	HNE_0239	HNE_0239	-	conserved hypothetical protein	3.31693	1.62114
230571	230580	HNE_0239	HNE_0239	-	conserved hypothetical protein	3.43203	1.66823
230581	230590	HNE_0239	HNE_0239	-	conserved hypothetical protein	3.44249	1.70186
230591	230600	HNE_0239	HNE_0239	-	conserved hypothetical protein	3.54712	1.7624
230601	230610	HNE_0239	HNE_0239	-	conserved hypothetical protein	3.58898	1.79603
230611	230620	HNE_0239	HNE_0239	-	conserved hypothetical protein	3.63083	1.75567
230621	230630	HNE_0239	HNE_0239	-	conserved hypothetical protein	3.54712	1.54042
230631	230640	HNE_0239	HNE_0239	-	conserved hypothetical protein	3.35878	1.32516
230641	230650	HNE_0239	HNE_0239	-	conserved hypothetical protein	3.28554	1.13009
230651	230660	HNE_0239	HNE_0239	-	conserved hypothetical protein	3.33786	0.834113
230661	230670	HNE_0239	HNE_0239	-	conserved hypothetical protein	3.24368	0.612131
230671	230680	HNE_0239	HNE_0239	-	conserved hypothetical protein	3.4111	0.403603
230681	230690	HNE_0239	HNE_0239	-	conserved hypothetical protein	3.14951	0.248889
230691	230700	HNE_0239	HNE_0239	-	conserved hypothetical protein	3.44249	0.107628
230701	230710	HNE_0239	HNE_0239	-	conserved hypothetical protein	3.53666	0.0941741
230711	230720	HNE_0239	HNE_0239	-	conserved hypothetical protein	3.59944	0.0739939
230721	230730	HNE_0239	HNE_0239	-	conserved hypothetical protein	3.96566	0.0807206
230731	230740	HNE_0239	HNE_0239	-	conserved hypothetical protein	3.92381	0.107628
230741	230750	HNE_0239	HNE_0239	-	conserved hypothetical protein	4.04937	0.221982
230751	230760	HNE_0239	HNE_0239	-	conserved hypothetical protein	3.79825	0.551591
230761	230770	HNE_0239	HNE_0239	-	conserved hypothetical protein	3.92381	1.04264
230771	230780	HNE_0239	HNE_0239	-	conserved hypothetical protein	3.68315	1.63459
230781	230790	HNE_0239	HNE_0239	-	conserved hypothetical protein	3.39017	2.21309
230791	230800	HNE_0239	HNE_0239	-	conserved hypothetical protein	3.22276	2.46198
230801	230810	HNE_0239	HNE_0239	-	conserved hypothetical protein	3.04488	2.65033
230811	230820	HNE_0239	HNE_0239	-	conserved hypothetical protein	3.05534	2.65033
230821	230830	HNE_0239	HNE_0239	-	conserved hypothetical protein	2.67865	2.52925
230831	230840	HNE_0239	HNE_0239	-	conserved hypothetical protein	2.72051	2.36781
230841	230850	HNE_0239	HNE_0239	-	conserved hypothetical protein	2.68912	2.27363
230851	230860	HNE_0239	HNE_0239	-	conserved hypothetical protein	2.84607	2.59651
230861	230870	HNE_0239	HNE_0239	-	conserved hypothetical protein	2.59495	2.73777
230871	230880	HNE_0239	HNE_0239	-	conserved hypothetical protein	2.59495	2.92612
230881	230890	HNE_0239	HNE_0239	-	conserved hypothetical protein	2.92978	3.29609
230891	230900	HNE_0239	HNE_0239	-	conserved hypothetical protein	2.81468	3.45753
230901	230910	HNE_0239	HNE_0239	-	conserved hypothetical protein	2.87746	3.58534
230911	230920	HNE_0239	HNE_0239	-	conserved hypothetical protein	2.80422	3.41045
230921	230930	HNE_0239	HNE_0239	-	conserved hypothetical protein	3.22276	3.27591
230931	230940	HNE_0239	HNE_0239	-	conserved hypothetical protein	3.20183	2.93285
230941	230950	HNE_0239	HNE_0239	-	conserved hypothetical protein	3.13905	2.5427
230951	230960	HNE_0239	HNE_0239	-	conserved hypothetical protein	3.26461	2.27363
230961	230970	HNE_0239	HNE_0239	-	conserved hypothetical protein	3.20183	2.14582
230971	230980	HNE_0239	HNE_0239	-	conserved hypothetical protein	3.03441	2.05838
230981	230990					2.87746	2.50234
230991	231000	HNE_0240	HNE_0240	-	hypothetical protein	3.05534	2.93285
231001	231010	HNE_0240	HNE_0240	-	hypothetical protein	2.87746	3.08756
231011	231020	HNE_0240	HNE_0240	-	hypothetical protein	2.65773	3.12792
231021	231030	HNE_0240	HNE_0240	-	hypothetical protein	2.91932	3.34318
231031	231040	HNE_0240	HNE_0240	-	hypothetical protein	3.04488	3.47771
231041	231050	HNE_0240	HNE_0240	-	hypothetical protein	3.07627	3.21537
231051	231060	HNE_0240	HNE_0240	-	hypothetical protein	2.85653	3.13465
231061	231070	HNE_0240	HNE_0240	-	hypothetical protein	3.11812	3.22883
231071	231080	HNE_0240	HNE_0240	-	hypothetical protein	3.03441	3.34318
231081	231090	HNE_0240	HNE_0240	-	hypothetical protein	2.97163	3.04048
231091	231100	HNE_0240	HNE_0240	-	hypothetical protein	2.72051	2.9463
231101	231110	HNE_0240	HNE_0240	-	hypothetical protein	2.867	3.10102
231111	231120	HNE_0240	HNE_0240	-	hypothetical protein	2.89839	3.01357
231121	231130	HNE_0240	HNE_0240	-	hypothetical protein	2.88792	3.20864
231131	231140	HNE_0240	HNE_0240	-	hypothetical protein	2.90885	3.24901
231141	231150	HNE_0240	HNE_0240	-	hypothetical protein	2.95071	3.63243
231151	231160	HNE_0240	HNE_0240	-	hypothetical protein	3.07627	4.06294
231161	231170	HNE_0240	HNE_0240	-	hypothetical protein	3.12859	3.81405
231171	231180	HNE_0240	HNE_0240	-	hypothetical protein	3.08673	3.55171
231181	231190	HNE_0240	HNE_0240	-	hypothetical protein	3.20183	2.9194
231191	231200	HNE_0240	HNE_0240	-	hypothetical protein	2.94024	2.40817
231201	231210	HNE_0240	HNE_0240	-	hypothetical protein	3.10766	2.29381
231211	231220	HNE_0240	HNE_0240	-	hypothetical protein	3.05534	2.0651
231221	231230	HNE_0240	HNE_0240	-	hypothetical protein	3.21229	2.34762
231231	231240	HNE_0240	HNE_0240	-	hypothetical protein	3.22276	2.85886
231241	231250	HNE_0240	HNE_0240	-	hypothetical protein	3.32739	3.47099
231251	231260	HNE_0240	HNE_0240	-	hypothetical protein	3.46342	3.92168
231261	231270	HNE_0240	HNE_0240	-	hypothetical protein	3.42156	3.9284
231271	231280	HNE_0240	HNE_0240	-	hypothetical protein	3.24368	3.87459
231281	231290	HNE_0240	HNE_0240	-	hypothetical protein	3.23322	3.59879
231291	231300	HNE_0240	HNE_0240	-	hypothetical protein	3.20183	3.36336
231301	231310	HNE_0240	HNE_0240	-	hypothetical protein	3.25415	3.37681
231311	231320	HNE_0240	HNE_0240	-	hypothetical protein	3.4111	3.33645
231321	231330	HNE_0240	HNE_0240	-	hypothetical protein	3.55759	3.41717
231331	231340	HNE_0240	HNE_0240	-	hypothetical protein	3.56805	3.57861
231341	231350	HNE_0240	HNE_0240	-	hypothetical protein	3.58898	3.68624
231351	231360	HNE_0240	HNE_0240	-	hypothetical protein	3.75639	3.5248
231361	231370	HNE_0240	HNE_0240	-	hypothetical protein	3.45295	3.20192
231371	231380	HNE_0240	HNE_0240	-	hypothetical protein	3.54712	3.0472
231381	231390	HNE_0240	HNE_0240	-	hypothetical protein	3.25415	2.68396
231391	231400	HNE_0240	HNE_0240	-	hypothetical protein	3.37971	2.30726
231401	231410	HNE_0240	HNE_0240	-	hypothetical protein	3.31693	2.45525
231411	231420	HNE_0240	HNE_0240	-	hypothetical protein	3.02395	2.53597
231421	231430	HNE_0240	HNE_0240	-	hypothetical protein	3.12859	2.58306
231431	231440	HNE_0240	HNE_0240	-	hypothetical protein	2.81468	2.68396
231441	231450	HNE_0240	HNE_0240	-	hypothetical protein	2.95071	2.77813
231451	231460	HNE_0240	HNE_0240	-	hypothetical protein	2.99256	2.60997
231461	231470	HNE_0240	HNE_0240	-	hypothetical protein	2.55309	1.98438
231471	231480	HNE_0240	HNE_0240	-	hypothetical protein	2.68912	1.82967
231481	231490	HNE_0241	fliL	-	flagellar basal body-associated protein FliL	2.43799	1.70859
231491	231500	HNE_0241	fliL	-	flagellar basal body-associated protein FliL	2.56356	1.67495
231501	231510	HNE_0241	fliL	-	flagellar basal body-associated protein FliL	2.56356	1.82967
231511	231520	HNE_0241	fliL	-	flagellar basal body-associated protein FliL	2.73097	2.25345
231521	231530	HNE_0241	fliL	-	flagellar basal body-associated protein FliL	3.00302	2.53597
231531	231540	HNE_0241	fliL	-	flagellar basal body-associated protein FliL	3.15998	2.78486
231541	231550	HNE_0241	fliL	-	flagellar basal body-associated protein FliL	3.28554	2.89249
231551	231560	HNE_0241	fliL	-	flagellar basal body-associated protein FliL	3.08673	2.89922
231561	231570	HNE_0241	fliL	-	flagellar basal body-associated protein FliL	2.96117	2.63687
231571	231580	HNE_0241	fliL	-	flagellar basal body-associated protein FliL	2.79375	2.43507
231581	231590	HNE_0241	fliL	-	flagellar basal body-associated protein FliL	2.84607	2.0651
231591	231600	HNE_0241	fliL	-	flagellar basal body-associated protein FliL	2.85653	1.57405
231601	231610	HNE_0241	fliL	-	flagellar basal body-associated protein FliL	2.81468	1.21754
231611	231620	HNE_0241	fliL	-	flagellar basal body-associated protein FliL	2.82514	0.988828
231621	231630	HNE_0241	fliL	-	flagellar basal body-associated protein FliL	2.71005	1.04264
231631	231640	HNE_0241	fliL	-	flagellar basal body-associated protein FliL	2.64726	1.29153
231641	231650	HNE_0241	fliL	-	flagellar basal body-associated protein FliL	2.56356	1.78258
231651	231660	HNE_0241	fliL	-	flagellar basal body-associated protein FliL	2.38568	2.19964
231661	231670	HNE_0241	fliL	-	flagellar basal body-associated protein FliL	2.61587	2.47543
231671	231680	HNE_0241	fliL	-	flagellar basal body-associated protein FliL	2.69958	2.34762
231681	231690	HNE_0241	fliL	-	flagellar basal body-associated protein FliL	2.69958	2.22654
231691	231700	HNE_0241	fliL	-	flagellar basal body-associated protein FliL	2.71005	2.10546
231701	231710	HNE_0241	fliL	-	flagellar basal body-associated protein FliL	2.64726	2.00456
231711	231720	HNE_0241	fliL	-	flagellar basal body-associated protein FliL	2.73097	2.17273
231721	231730	HNE_0241	fliL	-	flagellar basal body-associated protein FliL	2.5217	2.19291
231731	231740	HNE_0241	fliL	-	flagellar basal body-associated protein FliL	2.41707	2.07183
231741	231750	HNE_0241	fliL	-	flagellar basal body-associated protein FliL	2.44846	1.88348
231751	231760	HNE_0241	fliL	-	flagellar basal body-associated protein FliL	2.41707	1.77585
231761	231770	HNE_0241	fliL	-	flagellar basal body-associated protein FliL	2.46939	1.70186
231771	231780	HNE_0241	fliL	-	flagellar basal body-associated protein FliL	2.51124	1.70186
231781	231790	HNE_0241	fliL	-	flagellar basal body-associated protein FliL	2.867	1.82967
231791	231800	HNE_0241	fliL	-	flagellar basal body-associated protein FliL	3.04488	2.15255
231801	231810	HNE_0241	fliL	-	flagellar basal body-associated protein FliL	3.15998	2.5427
231811	231820	HNE_0241	fliL	-	flagellar basal body-associated protein FliL	3.44249	2.76468
231821	231830	HNE_0241	fliL	-	flagellar basal body-associated protein FliL	3.79825	2.79832
231831	231840	HNE_0241	fliL	-	flagellar basal body-associated protein FliL	3.8401	2.53597
231841	231850	HNE_0241	fliL	-	flagellar basal body-associated protein FliL	4.14354	2.36108
231851	231860	HNE_0241	fliL	-	flagellar basal body-associated protein FliL	4.58301	2.19291
231861	231870	HNE_0241	fliL	-	flagellar basal body-associated protein FliL	4.86553	2.01129
231871	231880	HNE_0241	fliL	-	flagellar basal body-associated protein FliL	5.89095	1.84312
231881	231890	HNE_0241	fliL	-	flagellar basal body-associated protein FliL	7.2512	1.74222
231891	231900	HNE_0241	fliL	-	flagellar basal body-associated protein FliL	8.71609	1.74895
231901	231910	HNE_0241	fliL	-	flagellar basal body-associated protein FliL	9.75198	1.84312
231911	231920	HNE_0241	fliL	-	flagellar basal body-associated protein FliL	12.8701	1.9642
231921	231930	HNE_0241	fliL	-	flagellar basal body-associated protein FliL	15.4441	1.76913
231931	231940	HNE_0241	fliL	-	flagellar basal body-associated protein FliL	17.7879	1.60769
231941	231950	HNE_0241	fliL	-	flagellar basal body-associated protein FliL	20.2678	1.37225
231951	231960	HNE_0241	fliL	-	flagellar basal body-associated protein FliL	23.6789	1.083
231961	231970	HNE_0241	fliL	-	flagellar basal body-associated protein FliL	28.8792	0.780299
231971	231980	HNE_0241	fliL	-	flagellar basal body-associated protein FliL	28.9943	0.511231
231981	231990	HNE_0241	fliL	-	flagellar basal body-associated protein FliL	29.7791	0.43051
231991	232000	HNE_0241	fliL	-	flagellar basal body-associated protein FliL	29.6326	0.322883
232001	232010					31.5684	0.302702
232011	232020					30.6999	0.235435
232021	232030					27.7387	0.195075
232031	232040					31.4742	0.168168
232041	232050					32.9705	0.114354
232051	232060					35.0004	0.0739939
232061	232070					32.6043	0.0336336
232071	232080					31.9346	0.134534
232081	232090					31.108	0.181621
232091	232100					28.1363	0.484324
232101	232110					24.495	0.652492
232111	232120					22.2454	0.686125
232121	232130	HNE_0242	fliF	+	flagellar M-ring protein FliF	20.8119	0.760119
232131	232140	HNE_0242	fliF	+	flagellar M-ring protein FliF	18.4262	0.955194
232141	232150	HNE_0242	fliF	+	flagellar M-ring protein FliF	16.3544	1.27808
232151	232160	HNE_0242	fliF	+	flagellar M-ring protein FliF	15.1302	1.47988
232161	232170	HNE_0242	fliF	+	flagellar M-ring protein FliF	13.4351	1.49333
232171	232180	HNE_0242	fliF	+	flagellar M-ring protein FliF	12.4306	1.89693
232181	232190	HNE_0242	fliF	+	flagellar M-ring protein FliF	10.2856	2.03147
232191	232200	HNE_0242	fliF	+	flagellar M-ring protein FliF	9.37529	2.07856
232201	232210	HNE_0242	fliF	+	flagellar M-ring protein FliF	7.82669	2.09874
232211	232220	HNE_0242	fliF	+	flagellar M-ring protein FliF	6.62339	2.05838
232221	232230	HNE_0242	fliF	+	flagellar M-ring protein FliF	5.51426	2.21309
232231	232240	HNE_0242	fliF	+	flagellar M-ring protein FliF	4.48884	2.17273
232241	232250	HNE_0242	fliF	+	flagellar M-ring protein FliF	4.1854	2.52925
232251	232260	HNE_0242	fliF	+	flagellar M-ring protein FliF	4.0703	2.87904
232261	232270	HNE_0242	fliF	+	flagellar M-ring protein FliF	3.92381	3.06066
232271	232280	HNE_0242	fliF	+	flagellar M-ring protein FliF	3.58898	2.98666
232281	232290	HNE_0242	fliF	+	flagellar M-ring protein FliF	3.57852	2.73105
232291	232300	HNE_0242	fliF	+	flagellar M-ring protein FliF	3.53666	2.37453
232301	232310	HNE_0242	fliF	+	flagellar M-ring protein FliF	3.40064	1.80276
232311	232320	HNE_0242	fliF	+	flagellar M-ring protein FliF	3.28554	1.30498
232321	232330	HNE_0242	fliF	+	flagellar M-ring protein FliF	3.20183	1.16372
232331	232340	HNE_0242	fliF	+	flagellar M-ring protein FliF	3.26461	1.42606
232341	232350	HNE_0242	fliF	+	flagellar M-ring protein FliF	3.25415	2.07183
232351	232360	HNE_0242	fliF	+	flagellar M-ring protein FliF	3.32739	2.73105
232361	232370	HNE_0242	fliF	+	flagellar M-ring protein FliF	3.17044	3.06066
232371	232380	HNE_0242	fliF	+	flagellar M-ring protein FliF	3.1809	3.47099
232381	232390	HNE_0242	fliF	+	flagellar M-ring protein FliF	3.1809	3.5248
232391	232400	HNE_0242	fliF	+	flagellar M-ring protein FliF	3.17044	3.59207
232401	232410	HNE_0242	fliF	+	flagellar M-ring protein FliF	3.17044	3.39699
232411	232420	HNE_0242	fliF	+	flagellar M-ring protein FliF	3.26461	3.22883
232421	232430	HNE_0242	fliF	+	flagellar M-ring protein FliF	3.62037	3.06738
232431	232440	HNE_0242	fliF	+	flagellar M-ring protein FliF	3.49481	2.60997
232441	232450	HNE_0242	fliF	+	flagellar M-ring protein FliF	3.50527	2.32072
232451	232460	HNE_0242	fliF	+	flagellar M-ring protein FliF	3.71454	1.99111
232461	232470	HNE_0242	fliF	+	flagellar M-ring protein FliF	3.82964	1.97766
232471	232480	HNE_0242	fliF	+	flagellar M-ring protein FliF	4.22725	2.36108
232481	232490	HNE_0242	fliF	+	flagellar M-ring protein FliF	4.60394	2.89249
232491	232500	HNE_0242	fliF	+	flagellar M-ring protein FliF	4.93877	3.31627
232501	232510	HNE_0242	fliF	+	flagellar M-ring protein FliF	5.44102	3.6997
232511	232520	HNE_0242	fliF	+	flagellar M-ring protein FliF	5.67121	4.04276
232521	232530	HNE_0242	fliF	+	flagellar M-ring protein FliF	6.01651	4.26474
232531	232540	HNE_0242	fliF	+	flagellar M-ring protein FliF	6.17346	4.15039
232541	232550	HNE_0242	fliF	+	flagellar M-ring protein FliF	6.163	4.0293
232551	232560	HNE_0242	fliF	+	flagellar M-ring protein FliF	5.91187	4.17057
232561	232570	HNE_0242	fliF	+	flagellar M-ring protein FliF	6.10022	4.406
232571	232580	HNE_0242	fliF	+	flagellar M-ring protein FliF	6.31995	4.50018
232581	232590	HNE_0242	fliF	+	flagellar M-ring protein FliF	5.95373	4.37909
232591	232600	HNE_0242	fliF	+	flagellar M-ring protein FliF	5.77585	4.28492
232601	232610	HNE_0242	fliF	+	flagellar M-ring protein FliF	6.13161	4.66834
232611	232620	HNE_0242	fliF	+	flagellar M-ring protein FliF	6.20485	4.68852
232621	232630	HNE_0242	fliF	+	flagellar M-ring protein FliF	6.48737	4.76924
232631	232640	HNE_0242	fliF	+	flagellar M-ring protein FliF	6.33041	4.72216
232641	232650	HNE_0242	fliF	+	flagellar M-ring protein FliF	6.12115	4.49345
232651	232660	HNE_0242	fliF	+	flagellar M-ring protein FliF	5.9328	4.39255
232661	232670	HNE_0242	fliF	+	flagellar M-ring protein FliF	5.88048	4.14366
232671	232680	HNE_0242	fliF	+	flagellar M-ring protein FliF	5.3887	3.97549
232681	232690	HNE_0242	fliF	+	flagellar M-ring protein FliF	4.50977	3.80732
232691	232700	HNE_0242	fliF	+	flagellar M-ring protein FliF	4.37374	4.02258
232701	232710	HNE_0242	fliF	+	flagellar M-ring protein FliF	4.26911	4.2042
232711	232720	HNE_0242	fliF	+	flagellar M-ring protein FliF	4.05984	4.29165
232721	232730	HNE_0242	fliF	+	flagellar M-ring protein FliF	3.5262	4.16384
232731	232740	HNE_0242	fliF	+	flagellar M-ring protein FliF	3.42156	4.2042
232741	232750	HNE_0242	fliF	+	flagellar M-ring protein FliF	3.04488	3.94186
232751	232760	HNE_0242	fliF	+	flagellar M-ring protein FliF	2.71005	3.71988
232761	232770	HNE_0242	fliF	+	flagellar M-ring protein FliF	2.64726	3.80732
232771	232780	HNE_0242	fliF	+	flagellar M-ring protein FliF	2.4066	3.88804
232781	232790	HNE_0242	fliF	+	flagellar M-ring protein FliF	2.3229	3.84096
232791	232800	HNE_0242	fliF	+	flagellar M-ring protein FliF	2.17641	3.58534
232801	232810	HNE_0242	fliF	+	flagellar M-ring protein FliF	2.30197	3.6257
232811	232820	HNE_0242	fliF	+	flagellar M-ring protein FliF	2.19733	3.69297
232821	232830	HNE_0242	fliF	+	flagellar M-ring protein FliF	2.18687	3.58534
232831	232840	HNE_0242	fliF	+	flagellar M-ring protein FliF	2.29151	3.56516
232841	232850	HNE_0242	fliF	+	flagellar M-ring protein FliF	2.28104	3.55843
232851	232860	HNE_0242	fliF	+	flagellar M-ring protein FliF	2.22872	3.73333
232861	232870	HNE_0242	fliF	+	flagellar M-ring protein FliF	2.23919	3.8006
232871	232880	HNE_0242	fliF	+	flagellar M-ring protein FliF	2.07177	3.74678
232881	232890	HNE_0242	fliF	+	flagellar M-ring protein FliF	1.91482	3.45081
232891	232900	HNE_0242	fliF	+	flagellar M-ring protein FliF	1.76833	3.20864
232901	232910	HNE_0242	fliF	+	flagellar M-ring protein FliF	1.78926	2.93958
232911	232920	HNE_0242	fliF	+	flagellar M-ring protein FliF	2.04038	2.48889
232921	232930	HNE_0242	fliF	+	flagellar M-ring protein FliF	2.06131	2.09874
232931	232940	HNE_0242	fliF	+	flagellar M-ring protein FliF	2.18687	1.72877
232941	232950	HNE_0242	fliF	+	flagellar M-ring protein FliF	2.47985	2.166
232951	232960	HNE_0242	fliF	+	flagellar M-ring protein FliF	2.55309	2.21982
232961	232970	HNE_0242	fliF	+	flagellar M-ring protein FliF	2.54263	2.52925
232971	232980	HNE_0242	fliF	+	flagellar M-ring protein FliF	2.38568	3.12792
232981	232990	HNE_0242	fliF	+	flagellar M-ring protein FliF	2.36475	3.63916
232991	233000	HNE_0242	fliF	+	flagellar M-ring protein FliF	2.50078	3.88804
233001	233010	HNE_0242	fliF	+	flagellar M-ring protein FliF	2.4066	3.68624
233011	233020	HNE_0242	fliF	+	flagellar M-ring protein FliF	2.43799	3.80732
233021	233030	HNE_0242	fliF	+	flagellar M-ring protein FliF	2.61587	3.94186
233031	233040	HNE_0242	fliF	+	flagellar M-ring protein FliF	2.62634	3.71315
233041	233050	HNE_0242	fliF	+	flagellar M-ring protein FliF	2.53217	3.1481
233051	233060	HNE_0242	fliF	+	flagellar M-ring protein FliF	2.71005	2.83195
233061	233070	HNE_0242	fliF	+	flagellar M-ring protein FliF	2.66819	2.24672
233071	233080	HNE_0242	fliF	+	flagellar M-ring protein FliF	2.65773	1.80949
233081	233090	HNE_0242	fliF	+	flagellar M-ring protein FliF	2.73097	1.43952
233091	233100	HNE_0242	fliF	+	flagellar M-ring protein FliF	2.92978	1.66823
233101	233110	HNE_0242	fliF	+	flagellar M-ring protein FliF	3.08673	2.0382
233111	233120	HNE_0242	fliF	+	flagellar M-ring protein FliF	3.03441	2.32744
233121	233130	HNE_0242	fliF	+	flagellar M-ring protein FliF	3.27507	2.77813
233131	233140	HNE_0242	fliF	+	flagellar M-ring protein FliF	3.34832	3.01357
233141	233150	HNE_0242	fliF	+	flagellar M-ring protein FliF	3.24368	3.10774
233151	233160	HNE_0242	fliF	+	flagellar M-ring protein FliF	3.12859	2.83195
233161	233170	HNE_0242	fliF	+	flagellar M-ring protein FliF	3.04488	2.61669
233171	233180	HNE_0242	fliF	+	flagellar M-ring protein FliF	3.09719	2.51579
233181	233190	HNE_0242	fliF	+	flagellar M-ring protein FliF	2.867	2.44853
233191	233200	HNE_0242	fliF	+	flagellar M-ring protein FliF	2.87746	2.58306
233201	233210	HNE_0242	fliF	+	flagellar M-ring protein FliF	2.83561	2.65033
233211	233220	HNE_0242	fliF	+	flagellar M-ring protein FliF	3.0658	3.03375
233221	233230	HNE_0242	fliF	+	flagellar M-ring protein FliF	3.1809	3.21537
233231	233240	HNE_0242	fliF	+	flagellar M-ring protein FliF	3.01349	3.30282
233241	233250	HNE_0242	fliF	+	flagellar M-ring protein FliF	3.28554	3.41717
233251	233260	HNE_0242	fliF	+	flagellar M-ring protein FliF	3.27507	3.16828
233261	233270	HNE_0242	fliF	+	flagellar M-ring protein FliF	3.37971	2.82522
233271	233280	HNE_0242	fliF	+	flagellar M-ring protein FliF	3.15998	2.42162
233281	233290	HNE_0242	fliF	+	flagellar M-ring protein FliF	3.17044	2.05165
233291	233300	HNE_0242	fliF	+	flagellar M-ring protein FliF	3.04488	1.77585
233301	233310	HNE_0242	fliF	+	flagellar M-ring protein FliF	2.92978	1.76913
233311	233320	HNE_0242	fliF	+	flagellar M-ring protein FliF	3.00302	2.12564
233321	233330	HNE_0242	fliF	+	flagellar M-ring protein FliF	3.00302	2.36108
233331	233340	HNE_0242	fliF	+	flagellar M-ring protein FliF	3.19137	2.48216
233341	233350	HNE_0242	fliF	+	flagellar M-ring protein FliF	3.19137	2.65705
233351	233360	HNE_0242	fliF	+	flagellar M-ring protein FliF	3.1809	2.75795
233361	233370	HNE_0242	fliF	+	flagellar M-ring protein FliF	3.17044	2.6436
233371	233380	HNE_0242	fliF	+	flagellar M-ring protein FliF	3.28554	2.57633
233381	233390	HNE_0242	fliF	+	flagellar M-ring protein FliF	3.23322	2.7445
233391	233400	HNE_0242	fliF	+	flagellar M-ring protein FliF	3.11812	2.92612
233401	233410	HNE_0242	fliF	+	flagellar M-ring protein FliF	3.19137	3.14138
233411	233420	HNE_0242	fliF	+	flagellar M-ring protein FliF	3.31693	3.29609
233421	233430	HNE_0242	fliF	+	flagellar M-ring protein FliF	3.296	3.33645
233431	233440	HNE_0242	fliF	+	flagellar M-ring protein FliF	3.0658	3.17501
233441	233450	HNE_0242	fliF	+	flagellar M-ring protein FliF	3.07627	2.79159
233451	233460	HNE_0242	fliF	+	flagellar M-ring protein FliF	3.15998	2.45525
233461	233470	HNE_0242	fliF	+	flagellar M-ring protein FliF	2.94024	2.31399
233471	233480	HNE_0242	fliF	+	flagellar M-ring protein FliF	3.12859	2.3409
233481	233490	HNE_0242	fliF	+	flagellar M-ring protein FliF	3.11812	2.18618
233491	233500	HNE_0242	fliF	+	flagellar M-ring protein FliF	3.22276	2.26018
233501	233510	HNE_0242	fliF	+	flagellar M-ring protein FliF	3.0658	2.44853
233511	233520	HNE_0242	fliF	+	flagellar M-ring protein FliF	2.84607	2.69741
233521	233530	HNE_0242	fliF	+	flagellar M-ring protein FliF	2.66819	2.70414
233531	233540	HNE_0242	fliF	+	flagellar M-ring protein FliF	2.44846	2.87231
233541	233550	HNE_0242	fliF	+	flagellar M-ring protein FliF	2.30197	2.80504
233551	233560	HNE_0242	fliF	+	flagellar M-ring protein FliF	2.18687	2.70414
233561	233570	HNE_0242	fliF	+	flagellar M-ring protein FliF	2.14502	2.48889
233571	233580	HNE_0242	fliF	+	flagellar M-ring protein FliF	2.23919	2.32744
233581	233590	HNE_0242	fliF	+	flagellar M-ring protein FliF	2.36475	2.60997
233591	233600	HNE_0242	fliF	+	flagellar M-ring protein FliF	2.37521	2.56288
233601	233610	HNE_0242	fliF	+	flagellar M-ring protein FliF	2.55309	2.82522
233611	233620	HNE_0242	fliF	+	flagellar M-ring protein FliF	2.5217	2.9463
233621	233630	HNE_0242	fliF	+	flagellar M-ring protein FliF	2.67865	3.02702
233631	233640	HNE_0242	fliF	+	flagellar M-ring protein FliF	2.44846	3.06066
233641	233650	HNE_0242	fliF	+	flagellar M-ring protein FliF	2.43799	2.80504
233651	233660	HNE_0242	fliF	+	flagellar M-ring protein FliF	2.16594	2.69741
233661	233670	HNE_0242	fliF	+	flagellar M-ring protein FliF	2.02992	2.71759
233671	233680	HNE_0242	fliF	+	flagellar M-ring protein FliF	2.02992	2.89922
233681	233690	HNE_0242	fliF	+	flagellar M-ring protein FliF	1.68462	2.91267
233691	233700	HNE_0242	fliF	+	flagellar M-ring protein FliF	1.78926	2.90594
233701	233710	HNE_0242	fliF	+	flagellar M-ring protein FliF	1.94621	3.06738
233711	233720	HNE_0242	fliF	+	flagellar M-ring protein FliF	2.15548	3.19519
233721	233730	HNE_0243	HNE_0243	+	hypothetical protein	2.57402	3.4239
233731	233740	HNE_0243	HNE_0243	+	hypothetical protein	2.71005	3.59879
233741	233750	HNE_0243	HNE_0243	+	hypothetical protein	3.02395	3.88132
233751	233760	HNE_0243	HNE_0243	+	hypothetical protein	2.89839	3.97549
233761	233770	HNE_0243	HNE_0243	+	hypothetical protein	2.9821	4.15039
233771	233780	HNE_0243	HNE_0243	+	hypothetical protein	3.04488	4.28492
233781	233790	HNE_0243	HNE_0243	+	hypothetical protein	2.78329	4.23783
233791	233800	HNE_0243	HNE_0243	+	hypothetical protein	2.61587	4.2042
233801	233810	HNE_0243	HNE_0243	+	hypothetical protein	2.99256	4.32528
233811	233820	HNE_0243	HNE_0243	+	hypothetical protein	3.07627	4.29165
233821	233830	HNE_0243	HNE_0243	+	hypothetical protein	3.13905	4.19075
233831	233840	HNE_0243	HNE_0243	+	hypothetical protein	3.01349	4.00912
233841	233850	HNE_0243	HNE_0243	+	hypothetical protein	3.08673	4.15039
233851	233860	HNE_0243	HNE_0243	+	hypothetical protein	3.46342	4.5069
233861	233870	HNE_0243	HNE_0243	+	hypothetical protein	3.27507	4.54054
233871	233880	HNE_0243	HNE_0243	+	hypothetical protein	3.296	4.48672
233881	233890	HNE_0243	HNE_0243	+	hypothetical protein	3.33786	4.6818
233891	233900	HNE_0243	HNE_0243	+	hypothetical protein	3.54712	4.94414
233901	233910	HNE_0243	HNE_0243	+	hypothetical protein	3.77732	4.81633
233911	233920	HNE_0243	HNE_0243	+	hypothetical protein	3.43203	4.33201
233921	233930	HNE_0243	HNE_0243	+	hypothetical protein	3.5262	4.28492
233931	233940	HNE_0243	HNE_0243	+	hypothetical protein	3.74593	4.11675
233941	233950	HNE_0243	HNE_0243	+	hypothetical protein	3.6413	3.88804
233951	233960	HNE_0243	HNE_0243	+	hypothetical protein	3.57852	3.74006
233961	233970	HNE_0243	HNE_0243	+	hypothetical protein	3.46342	3.83423
233971	233980	HNE_0243	HNE_0243	+	hypothetical protein	3.65176	3.9284
233981	233990	HNE_0243	HNE_0243	+	hypothetical protein	3.60991	4.04276
233991	234000	HNE_0243	HNE_0243	+	hypothetical protein	3.49481	4.17057
234001	234010	HNE_0243	HNE_0243	+	hypothetical protein	3.57852	4.17729
234011	234020	HNE_0243	HNE_0243	+	hypothetical protein	3.56805	4.34546
234021	234030	HNE_0243	HNE_0243	+	hypothetical protein	3.71454	4.54726
234031	234040	HNE_0243	HNE_0243	+	hypothetical protein	3.6413	4.67507
234041	234050	HNE_0243	HNE_0243	+	hypothetical protein	3.5262	4.7827
234051	234060	HNE_0243	HNE_0243	+	hypothetical protein	3.34832	4.92396
234061	234070	HNE_0243	HNE_0243	+	hypothetical protein	3.19137	5.15267
234071	234080	HNE_0243	HNE_0243	+	hypothetical protein	3.08673	5.05177
234081	234090	HNE_0243	HNE_0243	+	hypothetical protein	3.09719	4.93069
234091	234100	HNE_0243	HNE_0243	+	hypothetical protein	2.9821	4.71543
234101	234110	HNE_0243	HNE_0243	+	hypothetical protein	2.87746	4.46654
234111	234120	HNE_0243	HNE_0243	+	hypothetical protein	3.0658	4.37237
234121	234130	HNE_0243	HNE_0243	+	hypothetical protein	2.89839	4.14366
234131	234140	HNE_0243	HNE_0243	+	hypothetical protein	2.81468	3.85441
234141	234150	HNE_0243	HNE_0243	+	hypothetical protein	2.87746	3.65934
234151	234160	HNE_0243	HNE_0243	+	hypothetical protein	3.03441	3.51135
234161	234170	HNE_0243	HNE_0243	+	hypothetical protein	3.14951	3.50462
234171	234180	HNE_0243	HNE_0243	+	hypothetical protein	3.14951	3.39027
234181	234190	HNE_0243	HNE_0243	+	hypothetical protein	3.11812	3.34991
234191	234200	HNE_0243	HNE_0243	+	hypothetical protein	2.96117	3.323
234201	234210	HNE_0243	HNE_0243	+	hypothetical protein	2.81468	3.34991
234211	234220	HNE_0243	HNE_0243	+	hypothetical protein	2.77283	3.54498
234221	234230	HNE_0243	HNE_0243	+	hypothetical protein	2.36475	3.26246
234231	234240	HNE_0243	HNE_0243	+	hypothetical protein	2.47985	2.76468
234241	234250	HNE_0243	HNE_0243	+	hypothetical protein	2.43799	2.25345
234251	234260	HNE_0243	HNE_0243	+	hypothetical protein	2.69958	1.68841
234261	234270	HNE_0243	HNE_0243	+	hypothetical protein	2.45892	1.083
234271	234280	HNE_0243	HNE_0243	+	hypothetical protein	2.41707	0.464144
234281	234290	HNE_0243	HNE_0243	+	hypothetical protein	2.46939	0.134534
234291	234300	HNE_0243	HNE_0243	+	hypothetical protein	2.41707	0.188348
234301	234310	HNE_0243	HNE_0243	+	hypothetical protein	2.29151	0.443963
234311	234320	HNE_0243	HNE_0243	+	hypothetical protein	2.27058	0.766846
234321	234330					2.54263	1.17718
234331	234340	HNE_0244	HNE_0244	+	putative flagellar motor switch protein FliN	2.58448	1.55387
234341	234350	HNE_0244	HNE_0244	+	putative flagellar motor switch protein FliN	2.47985	1.78258
234351	234360	HNE_0244	HNE_0244	+	putative flagellar motor switch protein FliN	2.56356	1.89021
234361	234370	HNE_0244	HNE_0244	+	putative flagellar motor switch protein FliN	2.57402	1.80949
234371	234380	HNE_0244	HNE_0244	+	putative flagellar motor switch protein FliN	2.6368	1.75567
234381	234390	HNE_0244	HNE_0244	+	putative flagellar motor switch protein FliN	2.58448	1.47315
234391	234400	HNE_0244	HNE_0244	+	putative flagellar motor switch protein FliN	2.81468	1.21754
234401	234410	HNE_0244	HNE_0244	+	putative flagellar motor switch protein FliN	2.95071	1.06955
234411	234420	HNE_0244	HNE_0244	+	putative flagellar motor switch protein FliN	2.9821	0.921561
234421	234430	HNE_0244	HNE_0244	+	putative flagellar motor switch protein FliN	3.21229	0.733212
234431	234440	HNE_0244	HNE_0244	+	putative flagellar motor switch protein FliN	3.17044	0.531411
234441	234450	HNE_0244	HNE_0244	+	putative flagellar motor switch protein FliN	3.13905	0.417057
234451	234460	HNE_0244	HNE_0244	+	putative flagellar motor switch protein FliN	3.07627	0.443963
234461	234470	HNE_0244	HNE_0244	+	putative flagellar motor switch protein FliN	3.27507	0.45069
234471	234480	HNE_0244	HNE_0244	+	putative flagellar motor switch protein FliN	3.56805	0.672672
234481	234490	HNE_0244	HNE_0244	+	putative flagellar motor switch protein FliN	3.71454	0.713032
234491	234500	HNE_0244	HNE_0244	+	putative flagellar motor switch protein FliN	4.08076	0.719759
234501	234510	HNE_0244	HNE_0244	+	putative flagellar motor switch protein FliN	4.34235	0.692852
234511	234520	HNE_0244	HNE_0244	+	putative flagellar motor switch protein FliN	4.24818	0.753393
234521	234530	HNE_0244	HNE_0244	+	putative flagellar motor switch protein FliN	4.10169	0.807206
234531	234540	HNE_0244	HNE_0244	+	putative flagellar motor switch protein FliN	3.80871	0.793753
234541	234550	HNE_0244	HNE_0244	+	putative flagellar motor switch protein FliN	3.69361	1.05609
234551	234560	HNE_0244	HNE_0244	+	putative flagellar motor switch protein FliN	3.4111	1.36552
234561	234570	HNE_0244	HNE_0244	+	putative flagellar motor switch protein FliN	3.30646	1.44624
234571	234580	HNE_0244	HNE_0244	+	putative flagellar motor switch protein FliN	3.60991	1.42606
234581	234590	HNE_0244	HNE_0244	+	putative flagellar motor switch protein FliN	3.6413	1.31171
234591	234600	HNE_0244	HNE_0244	+	putative flagellar motor switch protein FliN	3.4111	1.02246
234601	234610	HNE_0244	HNE_0244	+	putative flagellar motor switch protein FliN	3.45295	0.760119
234611	234620	HNE_0244	HNE_0244	+	putative flagellar motor switch protein FliN	3.40064	0.618858
234621	234630	HNE_0244	HNE_0244	+	putative flagellar motor switch protein FliN	3.28554	0.719759
234631	234640	HNE_0244	HNE_0244	+	putative flagellar motor switch protein FliN	3.17044	0.753393
234641	234650	HNE_0245	fliP	+	flagellar biosynthetic protein FliP	3.12859	0.955194
234651	234660	HNE_0245	fliP	+	flagellar biosynthetic protein FliP	3.19137	1.2848
234661	234670	HNE_0245	fliP	+	flagellar biosynthetic protein FliP	3.24368	1.73549
234671	234680	HNE_0245	fliP	+	flagellar biosynthetic protein FliP	3.31693	2.01802
234681	234690	HNE_0245	fliP	+	flagellar biosynthetic protein FliP	3.48434	2.14582
234691	234700	HNE_0245	fliP	+	flagellar biosynthetic protein FliP	3.62037	2.43507
234701	234710	HNE_0245	fliP	+	flagellar biosynthetic protein FliP	3.65176	2.54943
234711	234720	HNE_0245	fliP	+	flagellar biosynthetic protein FliP	3.33786	2.5427
234721	234730	HNE_0245	fliP	+	flagellar biosynthetic protein FliP	3.10766	2.27363
234731	234740	HNE_0245	fliP	+	flagellar biosynthetic protein FliP	3.14951	2.21309
234741	234750	HNE_0245	fliP	+	flagellar biosynthetic protein FliP	3.04488	2.24
234751	234760	HNE_0245	fliP	+	flagellar biosynthetic protein FliP	2.7519	2.10546
234761	234770	HNE_0245	fliP	+	flagellar biosynthetic protein FliP	2.81468	1.93057
234771	234780	HNE_0245	fliP	+	flagellar biosynthetic protein FliP	2.92978	1.89693
234781	234790	HNE_0245	fliP	+	flagellar biosynthetic protein FliP	3.13905	2.19964
234791	234800	HNE_0245	fliP	+	flagellar biosynthetic protein FliP	3.43203	2.36108
234801	234810	HNE_0245	fliP	+	flagellar biosynthetic protein FliP	3.45295	2.38126
234811	234820	HNE_0245	fliP	+	flagellar biosynthetic protein FliP	3.63083	2.50234
234821	234830	HNE_0245	fliP	+	flagellar biosynthetic protein FliP	3.60991	2.4418
234831	234840	HNE_0245	fliP	+	flagellar biosynthetic protein FliP	3.75639	2.09874
234841	234850	HNE_0245	fliP	+	flagellar biosynthetic protein FliP	3.50527	1.69513
234851	234860	HNE_0245	fliP	+	flagellar biosynthetic protein FliP	3.28554	1.50679
234861	234870	HNE_0245	fliP	+	flagellar biosynthetic protein FliP	3.296	1.76913
234871	234880	HNE_0245	fliP	+	flagellar biosynthetic protein FliP	3.15998	2.05838
234881	234890	HNE_0245	fliP	+	flagellar biosynthetic protein FliP	3.03441	2.73105
234891	234900	HNE_0245	fliP	+	flagellar biosynthetic protein FliP	3.12859	3.0472
234901	234910	HNE_0245	fliP	+	flagellar biosynthetic protein FliP	3.02395	3.07411
234911	234920	HNE_0245	fliP	+	flagellar biosynthetic protein FliP	3.26461	2.71087
234921	234930	HNE_0245	fliP	+	flagellar biosynthetic protein FliP	3.22276	2.22654
234931	234940	HNE_0245	fliP	+	flagellar biosynthetic protein FliP	3.30646	1.66823
234941	234950	HNE_0245	fliP	+	flagellar biosynthetic protein FliP	3.46342	1.14354
234951	234960	HNE_0245	fliP	+	flagellar biosynthetic protein FliP	3.63083	1.2848
234961	234970	HNE_0245	fliP	+	flagellar biosynthetic protein FliP	3.6413	1.49333
234971	234980	HNE_0245	fliP	+	flagellar biosynthetic protein FliP	3.30646	1.97766
234981	234990	HNE_0245	fliP	+	flagellar biosynthetic protein FliP	3.4111	2.48889
234991	235000	HNE_0245	fliP	+	flagellar biosynthetic protein FliP	3.43203	2.9194
235001	235010	HNE_0245	fliP	+	flagellar biosynthetic protein FliP	3.5262	3.33645
235011	235020	HNE_0245	fliP	+	flagellar biosynthetic protein FliP	3.30646	3.31627
235021	235030	HNE_0245	fliP	+	flagellar biosynthetic protein FliP	3.24368	3.27591
235031	235040	HNE_0245	fliP	+	flagellar biosynthetic protein FliP	3.21229	3.02702
235041	235050	HNE_0245	fliP	+	flagellar biosynthetic protein FliP	3.14951	2.83868
235051	235060	HNE_0245	fliP	+	flagellar biosynthetic protein FliP	3.39017	2.81177
235061	235070	HNE_0245	fliP	+	flagellar biosynthetic protein FliP	3.21229	2.63015
235071	235080	HNE_0245	fliP	+	flagellar biosynthetic protein FliP	3.28554	2.54943
235081	235090	HNE_0245	fliP	+	flagellar biosynthetic protein FliP	3.43203	2.69069
235091	235100	HNE_0245	fliP	+	flagellar biosynthetic protein FliP	3.59944	2.83195
235101	235110	HNE_0245	fliP	+	flagellar biosynthetic protein FliP	3.68315	2.86558
235111	235120	HNE_0245	fliP	+	flagellar biosynthetic protein FliP	3.35878	2.80504
235121	235130	HNE_0245	fliP	+	flagellar biosynthetic protein FliP	3.26461	2.92612
235131	235140	HNE_0245	fliP	+	flagellar biosynthetic protein FliP	3.36925	2.95976
235141	235150	HNE_0245	fliP	+	flagellar biosynthetic protein FliP	3.47388	2.9463
235151	235160	HNE_0245	fliP	+	flagellar biosynthetic protein FliP	3.74593	2.97321
235161	235170	HNE_0245	fliP	+	flagellar biosynthetic protein FliP	4.02845	2.92612
235171	235180	HNE_0245	fliP	+	flagellar biosynthetic protein FliP	4.35281	2.58306
235181	235190	HNE_0245	fliP	+	flagellar biosynthetic protein FliP	4.57255	2.11219
235191	235200	HNE_0245	fliP	+	flagellar biosynthetic protein FliP	4.70857	1.71531
235201	235210	HNE_0245	fliP	+	flagellar biosynthetic protein FliP	4.60394	1.2579
235211	235220	HNE_0245	fliP	+	flagellar biosynthetic protein FliP	4.35281	0.672672
235221	235230	HNE_0245	fliP	+	flagellar biosynthetic protein FliP	4.24818	0.511231
235231	235240	HNE_0245	fliP	+	flagellar biosynthetic protein FliP	4.21679	0.827386
235241	235250	HNE_0245	fliP	+	flagellar biosynthetic protein FliP	3.88196	1.16372
235251	235260	HNE_0245	fliP	+	flagellar biosynthetic protein FliP	3.6413	1.53369
235261	235270	HNE_0245	fliP	+	flagellar biosynthetic protein FliP	3.85057	1.94402
235271	235280	HNE_0245	fliP	+	flagellar biosynthetic protein FliP	3.70408	2.31399
235281	235290	HNE_0245	fliP	+	flagellar biosynthetic protein FliP	3.43203	2.43507
235291	235300	HNE_0245	fliP	+	flagellar biosynthetic protein FliP	3.35878	2.2669
235301	235310	HNE_0245	fliP	+	flagellar biosynthetic protein FliP	3.73547	2.00456
235311	235320	HNE_0245	fliP	+	flagellar biosynthetic protein FliP	3.60991	1.60769
235321	235330	HNE_0245	fliP	+	flagellar biosynthetic protein FliP	3.65176	1.36552
235331	235340	HNE_0245	fliP	+	flagellar biosynthetic protein FliP	3.4111	1.36552
235341	235350	HNE_0245	fliP	+	flagellar biosynthetic protein FliP	3.59944	1.4866
235351	235360	HNE_0245	fliP	+	flagellar biosynthetic protein FliP	3.73547	1.56733
235361	235370	HNE_0245	fliP	+	flagellar biosynthetic protein FliP	3.54712	1.93057
235371	235380	HNE_0245	fliP	+	flagellar biosynthetic protein FliP	3.5262	2.21309
235381	235390	HNE_0245	fliP	+	flagellar biosynthetic protein FliP	3.26461	2.55615
235391	235400	HNE_0245	fliP	+	flagellar biosynthetic protein FliP	3.48434	2.52252
235401	235410	HNE_0246	HNE_0246	+	putative flagellar motor switch protein	3.25415	2.65033
235411	235420	HNE_0246	HNE_0246	+	putative flagellar motor switch protein	2.89839	2.73105
235421	235430	HNE_0246	HNE_0246	+	putative flagellar motor switch protein	3.08673	2.93958
235431	235440	HNE_0246	HNE_0246	+	putative flagellar motor switch protein	3.19137	3.10102
235441	235450	HNE_0246	HNE_0246	+	putative flagellar motor switch protein	3.14951	3.1212
235451	235460	HNE_0246	HNE_0246	+	putative flagellar motor switch protein	2.80422	3.26919
235461	235470	HNE_0246	HNE_0246	+	putative flagellar motor switch protein	2.68912	3.08756
235471	235480	HNE_0246	HNE_0246	+	putative flagellar motor switch protein	2.5217	2.92612
235481	235490	HNE_0246	HNE_0246	+	putative flagellar motor switch protein	2.42753	2.89922
235491	235500	HNE_0246	HNE_0246	+	putative flagellar motor switch protein	2.4066	3.0203
235501	235510	HNE_0246	HNE_0246	+	putative flagellar motor switch protein	2.43799	2.95976
235511	235520	HNE_0246	HNE_0246	+	putative flagellar motor switch protein	2.55309	3.10774
235521	235530	HNE_0246	HNE_0246	+	putative flagellar motor switch protein	2.79375	3.53153
235531	235540	HNE_0246	HNE_0246	+	putative flagellar motor switch protein	2.82514	3.93513
235541	235550	HNE_0246	HNE_0246	+	putative flagellar motor switch protein	2.83561	3.98222
235551	235560	HNE_0246	HNE_0246	+	putative flagellar motor switch protein	2.62634	3.6997
235561	235570	HNE_0246	HNE_0246	+	putative flagellar motor switch protein	2.65773	3.44408
235571	235580	HNE_0246	HNE_0246	+	putative flagellar motor switch protein	2.6368	2.78486
235581	235590	HNE_0246	HNE_0246	+	putative flagellar motor switch protein	2.43799	2.14582
235591	235600	HNE_0246	HNE_0246	+	putative flagellar motor switch protein	2.58448	1.73549
235601	235610	HNE_0246	HNE_0246	+	putative flagellar motor switch protein	2.51124	1.74895
235611	235620	HNE_0246	HNE_0246	+	putative flagellar motor switch protein	2.59495	2.02474
235621	235630	HNE_0246	HNE_0246	+	putative flagellar motor switch protein	2.66819	2.46198
235631	235640	HNE_0246	HNE_0246	+	putative flagellar motor switch protein	2.49031	2.86558
235641	235650	HNE_0246	HNE_0246	+	putative flagellar motor switch protein	2.60541	3.49117
235651	235660	HNE_0246	HNE_0246	+	putative flagellar motor switch protein	2.36475	3.67952
235661	235670	HNE_0246	HNE_0246	+	putative flagellar motor switch protein	2.41707	3.40372
235671	235680	HNE_0246	HNE_0246	+	putative flagellar motor switch protein	2.42753	3.30282
235681	235690	HNE_0246	HNE_0246	+	putative flagellar motor switch protein	2.4066	3.19519
235691	235700	HNE_0246	HNE_0246	+	putative flagellar motor switch protein	2.45892	3.10102
235701	235710	HNE_0246	HNE_0246	+	putative flagellar motor switch protein	2.21826	2.71759
235711	235720	HNE_0246	HNE_0246	+	putative flagellar motor switch protein	2.37521	2.66378
235721	235730	HNE_0246	HNE_0246	+	putative flagellar motor switch protein	2.46939	2.83868
235731	235740	HNE_0246	HNE_0246	+	putative flagellar motor switch protein	2.44846	2.9463
235741	235750	HNE_0246	HNE_0246	+	putative flagellar motor switch protein	2.41707	3.11447
235751	235760	HNE_0246	HNE_0246	+	putative flagellar motor switch protein	2.50078	3.18846
235761	235770	HNE_0246	HNE_0246	+	putative flagellar motor switch protein	2.79375	3.56516
235771	235780	HNE_0246	HNE_0246	+	putative flagellar motor switch protein	2.73097	3.65934
235781	235790	HNE_0246	HNE_0246	+	putative flagellar motor switch protein	2.67865	3.58534
235791	235800	HNE_0246	HNE_0246	+	putative flagellar motor switch protein	2.6368	3.57189
235801	235810	HNE_0246	HNE_0246	+	putative flagellar motor switch protein	2.58448	3.46426
235811	235820	HNE_0246	HNE_0246	+	putative flagellar motor switch protein	2.61587	3.7266
235821	235830	HNE_0246	HNE_0246	+	putative flagellar motor switch protein	2.67865	3.61897
235831	235840	HNE_0246	HNE_0246	+	putative flagellar motor switch protein	2.83561	3.70642
235841	235850	HNE_0246	HNE_0246	+	putative flagellar motor switch protein	3.0658	3.84096
235851	235860	HNE_0246	HNE_0246	+	putative flagellar motor switch protein	3.24368	3.86786
235861	235870	HNE_0246	HNE_0246	+	putative flagellar motor switch protein	3.5262	3.65261
235871	235880	HNE_0246	HNE_0246	+	putative flagellar motor switch protein	3.69361	2.86558
235881	235890	HNE_0246	HNE_0246	+	putative flagellar motor switch protein	3.45295	2.24
235891	235900	HNE_0246	HNE_0246	+	putative flagellar motor switch protein	3.67269	1.89021
235901	235910	HNE_0246	HNE_0246	+	putative flagellar motor switch protein	3.67269	1.53369
235911	235920	HNE_0246	HNE_0246	+	putative flagellar motor switch protein	3.73547	1.54715
235921	235930	HNE_0246	HNE_0246	+	putative flagellar motor switch protein	3.59944	1.91039
235931	235940	HNE_0246	HNE_0246	+	putative flagellar motor switch protein	3.47388	2.50234
235941	235950	HNE_0246	HNE_0246	+	putative flagellar motor switch protein	3.57852	3.15483
235951	235960	HNE_0246	HNE_0246	+	putative flagellar motor switch protein	3.23322	3.4239
235961	235970	HNE_0246	HNE_0246	+	putative flagellar motor switch protein	3.24368	3.20192
235971	235980	HNE_0246	HNE_0246	+	putative flagellar motor switch protein	3.42156	2.71087
235981	235990	HNE_0246	HNE_0246	+	putative flagellar motor switch protein	3.55759	2.35435
235991	236000	HNE_0246	HNE_0246	+	putative flagellar motor switch protein	3.71454	1.97766
236001	236010	HNE_0246	HNE_0246	+	putative flagellar motor switch protein	3.67269	1.73549
236011	236020	HNE_0246	HNE_0246	+	putative flagellar motor switch protein	4.04937	1.84312
236021	236030	HNE_0246	HNE_0246	+	putative flagellar motor switch protein	3.79825	2.1391
236031	236040	HNE_0246	HNE_0246	+	putative flagellar motor switch protein	3.62037	2.57633
236041	236050	HNE_0246	HNE_0246	+	putative flagellar motor switch protein	3.296	2.56961
236051	236060	HNE_0246	HNE_0246	+	putative flagellar motor switch protein	3.05534	2.34762
236061	236070	HNE_0246	HNE_0246	+	putative flagellar motor switch protein	3.296	2.17946
236071	236080	HNE_0246	HNE_0246	+	putative flagellar motor switch protein	3.11812	1.94402
236081	236090	HNE_0246	HNE_0246	+	putative flagellar motor switch protein	3.07627	1.77585
236091	236100	HNE_0246	HNE_0246	+	putative flagellar motor switch protein	3.25415	1.62114
236101	236110	HNE_0246	HNE_0246	+	putative flagellar motor switch protein	3.4111	1.42606
236111	236120	HNE_0246	HNE_0246	+	putative flagellar motor switch protein	3.46342	1.2848
236121	236130	HNE_0246	HNE_0246	+	putative flagellar motor switch protein	3.31693	0.961921
236131	236140	HNE_0246	HNE_0246	+	putative flagellar motor switch protein	3.21229	0.645765
236141	236150	HNE_0246	HNE_0246	+	putative flagellar motor switch protein	3.50527	0.45069
236151	236160	HNE_0246	HNE_0246	+	putative flagellar motor switch protein	3.31693	0.289249
236161	236170	HNE_0246	HNE_0246	+	putative flagellar motor switch protein	3.34832	0.632312
236171	236180	HNE_0246	HNE_0246	+	putative flagellar motor switch protein	3.47388	1.05609
236181	236190	HNE_0246	HNE_0246	+	putative flagellar motor switch protein	3.0658	1.45297
236191	236200	HNE_0246	HNE_0246	+	putative flagellar motor switch protein	3.15998	1.82294
236201	236210	HNE_0246	HNE_0246	+	putative flagellar motor switch protein	3.12859	2.11892
236211	236220	HNE_0246	HNE_0246	+	putative flagellar motor switch protein	3.24368	2.46198
236221	236230	HNE_0246	HNE_0246	+	putative flagellar motor switch protein	3.15998	2.3409
236231	236240	HNE_0246	HNE_0246	+	putative flagellar motor switch protein	3.05534	2.37453
236241	236250	HNE_0246	HNE_0246	+	putative flagellar motor switch protein	3.37971	2.42162
236251	236260	HNE_0246	HNE_0246	+	putative flagellar motor switch protein	3.33786	2.62342
236261	236270	HNE_0246	HNE_0246	+	putative flagellar motor switch protein	3.24368	2.80504
236271	236280	HNE_0246	HNE_0246	+	putative flagellar motor switch protein	3.12859	2.85886
236281	236290	HNE_0246	HNE_0246	+	putative flagellar motor switch protein	3.03441	2.81177
236291	236300	HNE_0246	HNE_0246	+	putative flagellar motor switch protein	3.0658	2.46198
236301	236310	HNE_0246	HNE_0246	+	putative flagellar motor switch protein	3.0658	1.99784
236311	236320	HNE_0246	HNE_0246	+	putative flagellar motor switch protein	3.05534	1.55387
236321	236330	HNE_0246	HNE_0246	+	putative flagellar motor switch protein	3.20183	1.09646
236331	236340	HNE_0246	HNE_0246	+	putative flagellar motor switch protein	3.25415	1.00228
236341	236350	HNE_0246	HNE_0246	+	putative flagellar motor switch protein	3.50527	1.29826
236351	236360	HNE_0246	HNE_0246	+	putative flagellar motor switch protein	3.43203	1.78931
236361	236370	HNE_0246	HNE_0246	+	putative flagellar motor switch protein	3.55759	2.40817
236371	236380	HNE_0246	HNE_0246	+	putative flagellar motor switch protein	3.63083	2.79159
236381	236390	HNE_0246	HNE_0246	+	putative flagellar motor switch protein	3.39017	3.03375
236391	236400	HNE_0246	HNE_0246	+	putative flagellar motor switch protein	3.37971	3.06066
236401	236410	HNE_0246	HNE_0246	+	putative flagellar motor switch protein	3.25415	3.10102
236411	236420	HNE_0246	HNE_0246	+	putative flagellar motor switch protein	3.28554	2.85886
236421	236430	HNE_0246	HNE_0246	+	putative flagellar motor switch protein	3.04488	2.62342
236431	236440	HNE_0246	HNE_0246	+	putative flagellar motor switch protein	3.00302	2.68396
236441	236450	HNE_0246	HNE_0246	+	putative flagellar motor switch protein	2.95071	2.77141
236451	236460	HNE_0246	HNE_0246	+	putative flagellar motor switch protein	3.00302	2.60997
236461	236470	HNE_0246	HNE_0246	+	putative flagellar motor switch protein	3.05534	2.31399
236471	236480	HNE_0246	HNE_0246	+	putative flagellar motor switch protein	3.0658	2.10546
236481	236490	HNE_0246	HNE_0246	+	putative flagellar motor switch protein	3.15998	2.15928
236491	236500					3.24368	2.10546
236501	236510					3.44249	2.20636
236511	236520					3.40064	2.31399
236521	236530					3.42156	2.38126
236531	236540					3.57852	2.45525
236541	236550					3.5262	2.44853
236551	236560	HNE_0247	flgI	-	flagellar P-ring protein FlgI	3.60991	2.44853
236561	236570	HNE_0247	flgI	-	flagellar P-ring protein FlgI	3.4111	2.57633
236571	236580	HNE_0247	flgI	-	flagellar P-ring protein FlgI	3.50527	2.88576
236581	236590	HNE_0247	flgI	-	flagellar P-ring protein FlgI	3.45295	3.12792
236591	236600	HNE_0247	flgI	-	flagellar P-ring protein FlgI	3.42156	3.35663
236601	236610	HNE_0247	flgI	-	flagellar P-ring protein FlgI	3.21229	3.58534
236611	236620	HNE_0247	flgI	-	flagellar P-ring protein FlgI	3.14951	3.6997
236621	236630	HNE_0247	flgI	-	flagellar P-ring protein FlgI	3.21229	3.60552
236631	236640	HNE_0247	flgI	-	flagellar P-ring protein FlgI	3.1809	3.35663
236641	236650	HNE_0247	flgI	-	flagellar P-ring protein FlgI	3.48434	3.08084
236651	236660	HNE_0247	flgI	-	flagellar P-ring protein FlgI	3.49481	2.8185
236661	236670	HNE_0247	flgI	-	flagellar P-ring protein FlgI	3.57852	2.46198
236671	236680	HNE_0247	flgI	-	flagellar P-ring protein FlgI	3.74593	2.27363
236681	236690	HNE_0247	flgI	-	flagellar P-ring protein FlgI	3.57852	2.00456
236691	236700	HNE_0247	flgI	-	flagellar P-ring protein FlgI	3.4111	2.20636
236701	236710	HNE_0247	flgI	-	flagellar P-ring protein FlgI	3.08673	2.40144
236711	236720	HNE_0247	flgI	-	flagellar P-ring protein FlgI	2.92978	2.57633
236721	236730	HNE_0247	flgI	-	flagellar P-ring protein FlgI	3.296	2.97994
236731	236740	HNE_0247	flgI	-	flagellar P-ring protein FlgI	3.12859	2.98666
236741	236750	HNE_0247	flgI	-	flagellar P-ring protein FlgI	3.10766	3.39027
236751	236760	HNE_0247	flgI	-	flagellar P-ring protein FlgI	3.14951	3.43063
236761	236770	HNE_0247	flgI	-	flagellar P-ring protein FlgI	3.40064	3.5248
236771	236780	HNE_0247	flgI	-	flagellar P-ring protein FlgI	3.42156	3.55171
236781	236790	HNE_0247	flgI	-	flagellar P-ring protein FlgI	3.11812	3.34318
236791	236800	HNE_0247	flgI	-	flagellar P-ring protein FlgI	3.03441	3.26919
236801	236810	HNE_0247	flgI	-	flagellar P-ring protein FlgI	3.13905	3.323
236811	236820	HNE_0247	flgI	-	flagellar P-ring protein FlgI	3.15998	3.16828
236821	236830	HNE_0247	flgI	-	flagellar P-ring protein FlgI	3.09719	2.95976
236831	236840	HNE_0247	flgI	-	flagellar P-ring protein FlgI	3.21229	2.55615
236841	236850	HNE_0247	flgI	-	flagellar P-ring protein FlgI	3.08673	2.08528
236851	236860	HNE_0247	flgI	-	flagellar P-ring protein FlgI	3.19137	1.82294
236861	236870	HNE_0247	flgI	-	flagellar P-ring protein FlgI	3.09719	1.46642
236871	236880	HNE_0247	flgI	-	flagellar P-ring protein FlgI	2.9821	1.39916
236881	236890	HNE_0247	flgI	-	flagellar P-ring protein FlgI	2.96117	1.56733
236891	236900	HNE_0247	flgI	-	flagellar P-ring protein FlgI	2.99256	1.9373
236901	236910	HNE_0247	flgI	-	flagellar P-ring protein FlgI	2.99256	2.3409
236911	236920	HNE_0247	flgI	-	flagellar P-ring protein FlgI	3.05534	2.67051
236921	236930	HNE_0247	flgI	-	flagellar P-ring protein FlgI	3.32739	3.00012
236931	236940	HNE_0247	flgI	-	flagellar P-ring protein FlgI	3.31693	3.11447
236941	236950	HNE_0247	flgI	-	flagellar P-ring protein FlgI	3.22276	3.37009
236951	236960	HNE_0247	flgI	-	flagellar P-ring protein FlgI	2.9821	3.48444
236961	236970	HNE_0247	flgI	-	flagellar P-ring protein FlgI	3.21229	3.67279
236971	236980	HNE_0247	flgI	-	flagellar P-ring protein FlgI	2.92978	3.57189
236981	236990	HNE_0247	flgI	-	flagellar P-ring protein FlgI	2.64726	3.43735
236991	237000	HNE_0247	flgI	-	flagellar P-ring protein FlgI	2.60541	3.28264
237001	237010	HNE_0247	flgI	-	flagellar P-ring protein FlgI	2.39614	3.01357
237011	237020	HNE_0247	flgI	-	flagellar P-ring protein FlgI	2.30197	3.16828
237021	237030	HNE_0247	flgI	-	flagellar P-ring protein FlgI	2.15548	3.09429
237031	237040	HNE_0247	flgI	-	flagellar P-ring protein FlgI	2.37521	3.20192
237041	237050	HNE_0247	flgI	-	flagellar P-ring protein FlgI	2.56356	3.41045
237051	237060	HNE_0247	flgI	-	flagellar P-ring protein FlgI	2.51124	3.67279
237061	237070	HNE_0247	flgI	-	flagellar P-ring protein FlgI	2.66819	3.61897
237071	237080	HNE_0247	flgI	-	flagellar P-ring protein FlgI	2.74144	3.0472
237081	237090	HNE_0247	flgI	-	flagellar P-ring protein FlgI	2.72051	2.48889
237091	237100	HNE_0247	flgI	-	flagellar P-ring protein FlgI	2.6368	1.91039
237101	237110	HNE_0247	flgI	-	flagellar P-ring protein FlgI	2.43799	1.71531
237111	237120	HNE_0247	flgI	-	flagellar P-ring protein FlgI	2.46939	1.62114
237121	237130	HNE_0247	flgI	-	flagellar P-ring protein FlgI	2.53217	2.11219
237131	237140	HNE_0247	flgI	-	flagellar P-ring protein FlgI	2.74144	2.78486
237141	237150	HNE_0247	flgI	-	flagellar P-ring protein FlgI	2.58448	3.34991
237151	237160	HNE_0247	flgI	-	flagellar P-ring protein FlgI	2.45892	3.86786
237161	237170	HNE_0247	flgI	-	flagellar P-ring protein FlgI	2.4066	3.84768
237171	237180	HNE_0247	flgI	-	flagellar P-ring protein FlgI	2.28104	3.76696
237181	237190	HNE_0247	flgI	-	flagellar P-ring protein FlgI	2.15548	3.44408
237191	237200	HNE_0247	flgI	-	flagellar P-ring protein FlgI	2.24965	3.34318
237201	237210	HNE_0247	flgI	-	flagellar P-ring protein FlgI	2.60541	3.41717
237211	237220	HNE_0247	flgI	-	flagellar P-ring protein FlgI	2.68912	3.41045
237221	237230	HNE_0247	flgI	-	flagellar P-ring protein FlgI	2.74144	3.47771
237231	237240	HNE_0247	flgI	-	flagellar P-ring protein FlgI	2.84607	3.34991
237241	237250	HNE_0247	flgI	-	flagellar P-ring protein FlgI	3.01349	3.38354
237251	237260	HNE_0247	flgI	-	flagellar P-ring protein FlgI	2.95071	3.47099
237261	237270	HNE_0247	flgI	-	flagellar P-ring protein FlgI	2.89839	3.78714
237271	237280	HNE_0247	flgI	-	flagellar P-ring protein FlgI	3.0658	3.8006
237281	237290	HNE_0247	flgI	-	flagellar P-ring protein FlgI	3.07627	3.79387
237291	237300	HNE_0247	flgI	-	flagellar P-ring protein FlgI	3.19137	3.84096
237301	237310	HNE_0247	flgI	-	flagellar P-ring protein FlgI	3.23322	3.86114
237311	237320	HNE_0247	flgI	-	flagellar P-ring protein FlgI	3.22276	3.35663
237321	237330	HNE_0247	flgI	-	flagellar P-ring protein FlgI	3.1809	2.89922
237331	237340	HNE_0247	flgI	-	flagellar P-ring protein FlgI	3.0658	2.87904
237341	237350	HNE_0247	flgI	-	flagellar P-ring protein FlgI	3.11812	3.01357
237351	237360	HNE_0247	flgI	-	flagellar P-ring protein FlgI	2.96117	3.21537
237361	237370	HNE_0247	flgI	-	flagellar P-ring protein FlgI	2.89839	3.38354
237371	237380	HNE_0247	flgI	-	flagellar P-ring protein FlgI	2.68912	3.73333
237381	237390	HNE_0247	flgI	-	flagellar P-ring protein FlgI	2.88792	3.81405
237391	237400	HNE_0247	flgI	-	flagellar P-ring protein FlgI	2.81468	3.55843
237401	237410	HNE_0247	flgI	-	flagellar P-ring protein FlgI	3.10766	3.57861
237411	237420	HNE_0247	flgI	-	flagellar P-ring protein FlgI	3.32739	3.50462
237421	237430	HNE_0247	flgI	-	flagellar P-ring protein FlgI	3.47388	3.51807
237431	237440	HNE_0247	flgI	-	flagellar P-ring protein FlgI	3.60991	3.32973
237441	237450	HNE_0247	flgI	-	flagellar P-ring protein FlgI	3.62037	3.11447
237451	237460	HNE_0247	flgI	-	flagellar P-ring protein FlgI	3.43203	2.7445
237461	237470	HNE_0247	flgI	-	flagellar P-ring protein FlgI	3.27507	2.40817
237471	237480	HNE_0247	flgI	-	flagellar P-ring protein FlgI	3.14951	2.23327
237481	237490	HNE_0247	flgI	-	flagellar P-ring protein FlgI	3.03441	2.13237
237491	237500	HNE_0247	flgI	-	flagellar P-ring protein FlgI	3.12859	2.38126
237501	237510	HNE_0247	flgI	-	flagellar P-ring protein FlgI	3.11812	2.6436
237511	237520	HNE_0247	flgI	-	flagellar P-ring protein FlgI	3.11812	3.01357
237521	237530	HNE_0247	flgI	-	flagellar P-ring protein FlgI	3.08673	3.05393
237531	237540	HNE_0247	flgI	-	flagellar P-ring protein FlgI	3.03441	2.93958
237541	237550	HNE_0247	flgI	-	flagellar P-ring protein FlgI	2.96117	2.73105
237551	237560	HNE_0247	flgI	-	flagellar P-ring protein FlgI	3.13905	2.58979
237561	237570	HNE_0247	flgI	-	flagellar P-ring protein FlgI	3.21229	2.57633
237571	237580	HNE_0247	flgI	-	flagellar P-ring protein FlgI	3.51573	2.60324
237581	237590	HNE_0247	flgI	-	flagellar P-ring protein FlgI	3.54712	2.77813
237591	237600	HNE_0247	flgI	-	flagellar P-ring protein FlgI	3.54712	2.8454
237601	237610	HNE_0247	flgI	-	flagellar P-ring protein FlgI	3.60991	2.98666
237611	237620	HNE_0247	flgI	-	flagellar P-ring protein FlgI	3.22276	3.10774
237621	237630	HNE_0247	flgI	-	flagellar P-ring protein FlgI	3.12859	3.00012
237631	237640	HNE_0247	flgI	-	flagellar P-ring protein FlgI	2.96117	2.59651
237641	237650	HNE_0247	flgI	-	flagellar P-ring protein FlgI	2.7519	2.05165
237651	237660	HNE_0247	flgI	-	flagellar P-ring protein FlgI	3.11812	1.61441
237661	237670	HNE_0247	flgI	-	flagellar P-ring protein FlgI	2.92978	1.32516
237671	237680	HNE_0248	HNE_0248	-	putative flagellar hook-associated protein FlgL	2.95071	0.827386
237681	237690	HNE_0248	HNE_0248	-	putative flagellar hook-associated protein FlgL	2.99256	0.679399
237691	237700	HNE_0248	HNE_0248	-	putative flagellar hook-associated protein FlgL	3.02395	0.813933
237701	237710	HNE_0248	HNE_0248	-	putative flagellar hook-associated protein FlgL	3.09719	0.982101
237711	237720	HNE_0248	HNE_0248	-	putative flagellar hook-associated protein FlgL	2.64726	1.05609
237721	237730	HNE_0248	HNE_0248	-	putative flagellar hook-associated protein FlgL	2.7519	1.17718
237731	237740	HNE_0248	HNE_0248	-	putative flagellar hook-associated protein FlgL	2.64726	1.49333
237741	237750	HNE_0248	HNE_0248	-	putative flagellar hook-associated protein FlgL	2.60541	1.90366
237751	237760	HNE_0248	HNE_0248	-	putative flagellar hook-associated protein FlgL	2.58448	2.05165
237761	237770	HNE_0248	HNE_0248	-	putative flagellar hook-associated protein FlgL	2.82514	2.21982
237771	237780	HNE_0248	HNE_0248	-	putative flagellar hook-associated protein FlgL	2.95071	2.29381
237781	237790	HNE_0248	HNE_0248	-	putative flagellar hook-associated protein FlgL	2.80422	2.00456
237791	237800	HNE_0248	HNE_0248	-	putative flagellar hook-associated protein FlgL	3.02395	1.61441
237801	237810	HNE_0248	HNE_0248	-	putative flagellar hook-associated protein FlgL	2.97163	1.41261
237811	237820	HNE_0248	HNE_0248	-	putative flagellar hook-associated protein FlgL	2.92978	1.55387
237821	237830	HNE_0248	HNE_0248	-	putative flagellar hook-associated protein FlgL	2.80422	1.91711
237831	237840	HNE_0248	HNE_0248	-	putative flagellar hook-associated protein FlgL	3.09719	2.38799
237841	237850	HNE_0248	HNE_0248	-	putative flagellar hook-associated protein FlgL	3.12859	3.06738
237851	237860	HNE_0248	HNE_0248	-	putative flagellar hook-associated protein FlgL	2.78329	3.40372
237861	237870	HNE_0248	HNE_0248	-	putative flagellar hook-associated protein FlgL	2.6368	3.74678
237871	237880	HNE_0248	HNE_0248	-	putative flagellar hook-associated protein FlgL	2.6368	3.66606
237881	237890	HNE_0248	HNE_0248	-	putative flagellar hook-associated protein FlgL	2.59495	3.69297
237891	237900	HNE_0248	HNE_0248	-	putative flagellar hook-associated protein FlgL	2.5217	3.54498
237901	237910	HNE_0248	HNE_0248	-	putative flagellar hook-associated protein FlgL	2.51124	3.55171
237911	237920	HNE_0248	HNE_0248	-	putative flagellar hook-associated protein FlgL	3.00302	3.78042
237921	237930	HNE_0248	HNE_0248	-	putative flagellar hook-associated protein FlgL	3.12859	3.61897
237931	237940	HNE_0248	HNE_0248	-	putative flagellar hook-associated protein FlgL	2.9821	3.51135
237941	237950	HNE_0248	HNE_0248	-	putative flagellar hook-associated protein FlgL	2.82514	3.36336
237951	237960	HNE_0248	HNE_0248	-	putative flagellar hook-associated protein FlgL	2.69958	3.55171
237961	237970	HNE_0248	HNE_0248	-	putative flagellar hook-associated protein FlgL	2.7519	3.61897
237971	237980	HNE_0248	HNE_0248	-	putative flagellar hook-associated protein FlgL	2.60541	3.37009
237981	237990	HNE_0248	HNE_0248	-	putative flagellar hook-associated protein FlgL	2.82514	3.61897
237991	238000	HNE_0248	HNE_0248	-	putative flagellar hook-associated protein FlgL	2.85653	3.61897
238001	238010	HNE_0248	HNE_0248	-	putative flagellar hook-associated protein FlgL	2.9821	3.53153
238011	238020	HNE_0248	HNE_0248	-	putative flagellar hook-associated protein FlgL	3.15998	3.43063
238021	238030	HNE_0248	HNE_0248	-	putative flagellar hook-associated protein FlgL	3.21229	3.36336
238031	238040	HNE_0248	HNE_0248	-	putative flagellar hook-associated protein FlgL	3.19137	3.69297
238041	238050	HNE_0248	HNE_0248	-	putative flagellar hook-associated protein FlgL	3.14951	3.50462
238051	238060	HNE_0248	HNE_0248	-	putative flagellar hook-associated protein FlgL	3.09719	3.54498
238061	238070	HNE_0248	HNE_0248	-	putative flagellar hook-associated protein FlgL	3.1809	3.58534
238071	238080	HNE_0248	HNE_0248	-	putative flagellar hook-associated protein FlgL	3.11812	3.47771
238081	238090	HNE_0248	HNE_0248	-	putative flagellar hook-associated protein FlgL	3.26461	3.46426
238091	238100	HNE_0248	HNE_0248	-	putative flagellar hook-associated protein FlgL	3.12859	3.00684
238101	238110	HNE_0248	HNE_0248	-	putative flagellar hook-associated protein FlgL	2.95071	2.61669
238111	238120	HNE_0248	HNE_0248	-	putative flagellar hook-associated protein FlgL	3.10766	2.41489
238121	238130	HNE_0248	HNE_0248	-	putative flagellar hook-associated protein FlgL	3.01349	2.17946
238131	238140	HNE_0248	HNE_0248	-	putative flagellar hook-associated protein FlgL	3.02395	2.07183
238141	238150	HNE_0248	HNE_0248	-	putative flagellar hook-associated protein FlgL	3.20183	2.21309
238151	238160	HNE_0248	HNE_0248	-	putative flagellar hook-associated protein FlgL	3.23322	2.43507
238161	238170	HNE_0248	HNE_0248	-	putative flagellar hook-associated protein FlgL	3.23322	2.44853
238171	238180	HNE_0248	HNE_0248	-	putative flagellar hook-associated protein FlgL	3.46342	2.67051
238181	238190	HNE_0248	HNE_0248	-	putative flagellar hook-associated protein FlgL	3.33786	2.69741
238191	238200	HNE_0248	HNE_0248	-	putative flagellar hook-associated protein FlgL	3.34832	2.75795
238201	238210	HNE_0248	HNE_0248	-	putative flagellar hook-associated protein FlgL	3.01349	2.61669
238211	238220	HNE_0248	HNE_0248	-	putative flagellar hook-associated protein FlgL	3.09719	2.75123
238221	238230	HNE_0248	HNE_0248	-	putative flagellar hook-associated protein FlgL	3.04488	3.00684
238231	238240	HNE_0248	HNE_0248	-	putative flagellar hook-associated protein FlgL	2.77283	3.11447
238241	238250	HNE_0248	HNE_0248	-	putative flagellar hook-associated protein FlgL	2.90885	3.323
238251	238260	HNE_0248	HNE_0248	-	putative flagellar hook-associated protein FlgL	2.88792	3.47771
238261	238270	HNE_0248	HNE_0248	-	putative flagellar hook-associated protein FlgL	2.77283	3.26246
238271	238280	HNE_0248	HNE_0248	-	putative flagellar hook-associated protein FlgL	2.83561	3.34318
238281	238290	HNE_0248	HNE_0248	-	putative flagellar hook-associated protein FlgL	2.85653	3.31627
238291	238300	HNE_0248	HNE_0248	-	putative flagellar hook-associated protein FlgL	3.02395	3.14138
238301	238310	HNE_0248	HNE_0248	-	putative flagellar hook-associated protein FlgL	3.01349	3.26919
238311	238320	HNE_0248	HNE_0248	-	putative flagellar hook-associated protein FlgL	2.90885	3.28264
238321	238330	HNE_0248	HNE_0248	-	putative flagellar hook-associated protein FlgL	2.9821	3.323
238331	238340	HNE_0248	HNE_0248	-	putative flagellar hook-associated protein FlgL	2.867	3.15483
238341	238350	HNE_0248	HNE_0248	-	putative flagellar hook-associated protein FlgL	3.0658	3.13465
238351	238360	HNE_0248	HNE_0248	-	putative flagellar hook-associated protein FlgL	2.92978	2.96648
238361	238370	HNE_0248	HNE_0248	-	putative flagellar hook-associated protein FlgL	3.13905	2.93285
238371	238380	HNE_0248	HNE_0248	-	putative flagellar hook-associated protein FlgL	3.43203	3.11447
238381	238390	HNE_0248	HNE_0248	-	putative flagellar hook-associated protein FlgL	3.48434	3.32973
238391	238400	HNE_0248	HNE_0248	-	putative flagellar hook-associated protein FlgL	3.58898	3.71988
238401	238410	HNE_0248	HNE_0248	-	putative flagellar hook-associated protein FlgL	3.47388	3.96876
238411	238420	HNE_0248	HNE_0248	-	putative flagellar hook-associated protein FlgL	3.56805	4.23783
238421	238430	HNE_0248	HNE_0248	-	putative flagellar hook-associated protein FlgL	3.35878	4.16384
238431	238440	HNE_0248	HNE_0248	-	putative flagellar hook-associated protein FlgL	2.97163	3.67279
238441	238450	HNE_0248	HNE_0248	-	putative flagellar hook-associated protein FlgL	2.80422	3.22883
238451	238460	HNE_0248	HNE_0248	-	putative flagellar hook-associated protein FlgL	2.80422	2.63687
238461	238470	HNE_0248	HNE_0248	-	putative flagellar hook-associated protein FlgL	2.76236	2.46198
238471	238480	HNE_0248	HNE_0248	-	putative flagellar hook-associated protein FlgL	3.03441	2.76468
238481	238490	HNE_0248	HNE_0248	-	putative flagellar hook-associated protein FlgL	3.03441	3.07411
238491	238500	HNE_0248	HNE_0248	-	putative flagellar hook-associated protein FlgL	3.26461	3.32973
238501	238510	HNE_0248	HNE_0248	-	putative flagellar hook-associated protein FlgL	3.14951	3.55171
238511	238520	HNE_0248	HNE_0248	-	putative flagellar hook-associated protein FlgL	3.19137	3.98894
238521	238530	HNE_0248	HNE_0248	-	putative flagellar hook-associated protein FlgL	3.296	3.78042
238531	238540	HNE_0248	HNE_0248	-	putative flagellar hook-associated protein FlgL	3.0658	3.47099
238541	238550	HNE_0248	HNE_0248	-	putative flagellar hook-associated protein FlgL	3.02395	3.38354
238551	238560	HNE_0248	HNE_0248	-	putative flagellar hook-associated protein FlgL	3.07627	3.60552
238561	238570	HNE_0248	HNE_0248	-	putative flagellar hook-associated protein FlgL	3.39017	3.65261
238571	238580	HNE_0248	HNE_0248	-	putative flagellar hook-associated protein FlgL	3.05534	3.56516
238581	238590	HNE_0248	HNE_0248	-	putative flagellar hook-associated protein FlgL	3.27507	3.71315
238591	238600	HNE_0248	HNE_0248	-	putative flagellar hook-associated protein FlgL	3.296	3.45753
238601	238610	HNE_0248	HNE_0248	-	putative flagellar hook-associated protein FlgL	3.5262	3.20864
238611	238620	HNE_0248	HNE_0248	-	putative flagellar hook-associated protein FlgL	3.32739	2.58306
238621	238630	HNE_0248	HNE_0248	-	putative flagellar hook-associated protein FlgL	3.15998	2.11219
238631	238640	HNE_0248	HNE_0248	-	putative flagellar hook-associated protein FlgL	3.30646	1.70859
238641	238650	HNE_0248	HNE_0248	-	putative flagellar hook-associated protein FlgL	3.28554	1.52024
238651	238660	HNE_0249	flgK	-	flagellar hook-associated protein FlgK	3.296	1.64805
238661	238670	HNE_0249	flgK	-	flagellar hook-associated protein FlgK	3.24368	1.9373
238671	238680	HNE_0249	flgK	-	flagellar hook-associated protein FlgK	3.296	2.42835
238681	238690	HNE_0249	flgK	-	flagellar hook-associated protein FlgK	3.67269	2.90594
238691	238700	HNE_0249	flgK	-	flagellar hook-associated protein FlgK	3.81918	3.20192
238701	238710	HNE_0249	flgK	-	flagellar hook-associated protein FlgK	3.63083	2.97321
238711	238720	HNE_0249	flgK	-	flagellar hook-associated protein FlgK	3.5262	2.36108
238721	238730	HNE_0249	flgK	-	flagellar hook-associated protein FlgK	3.48434	1.80276
238731	238740	HNE_0249	flgK	-	flagellar hook-associated protein FlgK	3.50527	1.31171
238741	238750	HNE_0249	flgK	-	flagellar hook-associated protein FlgK	3.42156	0.780299
238751	238760	HNE_0249	flgK	-	flagellar hook-associated protein FlgK	3.43203	0.706305
238761	238770	HNE_0249	flgK	-	flagellar hook-associated protein FlgK	3.50527	0.760119
238771	238780	HNE_0249	flgK	-	flagellar hook-associated protein FlgK	3.62037	1.08973
238781	238790	HNE_0249	flgK	-	flagellar hook-associated protein FlgK	3.6413	1.41261
238791	238800	HNE_0249	flgK	-	flagellar hook-associated protein FlgK	3.59944	1.72877
238801	238810	HNE_0249	flgK	-	flagellar hook-associated protein FlgK	3.45295	2.02474
238811	238820	HNE_0249	flgK	-	flagellar hook-associated protein FlgK	3.37971	2.11892
238821	238830	HNE_0249	flgK	-	flagellar hook-associated protein FlgK	3.28554	2.18618
238831	238840	HNE_0249	flgK	-	flagellar hook-associated protein FlgK	3.35878	2.20636
238841	238850	HNE_0249	flgK	-	flagellar hook-associated protein FlgK	3.68315	2.28036
238851	238860	HNE_0249	flgK	-	flagellar hook-associated protein FlgK	3.92381	2.35435
238861	238870	HNE_0249	flgK	-	flagellar hook-associated protein FlgK	4.03891	2.45525
238871	238880	HNE_0249	flgK	-	flagellar hook-associated protein FlgK	4.11215	2.79159
238881	238890	HNE_0249	flgK	-	flagellar hook-associated protein FlgK	4.10169	3.14138
238891	238900	HNE_0249	flgK	-	flagellar hook-associated protein FlgK	3.98659	2.87231
238901	238910	HNE_0249	flgK	-	flagellar hook-associated protein FlgK	3.73547	2.55615
238911	238920	HNE_0249	flgK	-	flagellar hook-associated protein FlgK	3.35878	2.11892
238921	238930	HNE_0249	flgK	-	flagellar hook-associated protein FlgK	3.01349	1.97093
238931	238940	HNE_0249	flgK	-	flagellar hook-associated protein FlgK	2.78329	1.82967
238941	238950	HNE_0249	flgK	-	flagellar hook-associated protein FlgK	2.87746	2.04492
238951	238960	HNE_0249	flgK	-	flagellar hook-associated protein FlgK	2.62634	2.35435
238961	238970	HNE_0249	flgK	-	flagellar hook-associated protein FlgK	2.53217	3.10774
238971	238980	HNE_0249	flgK	-	flagellar hook-associated protein FlgK	2.56356	3.6997
238981	238990	HNE_0249	flgK	-	flagellar hook-associated protein FlgK	2.61587	3.80732
238991	239000	HNE_0249	flgK	-	flagellar hook-associated protein FlgK	2.60541	3.75351
239001	239010	HNE_0249	flgK	-	flagellar hook-associated protein FlgK	2.80422	3.88132
239011	239020	HNE_0249	flgK	-	flagellar hook-associated protein FlgK	2.78329	4.00912
239021	239030	HNE_0249	flgK	-	flagellar hook-associated protein FlgK	2.88792	4.01585
239031	239040	HNE_0249	flgK	-	flagellar hook-associated protein FlgK	2.97163	4.0293
239041	239050	HNE_0249	flgK	-	flagellar hook-associated protein FlgK	2.95071	4.11003
239051	239060	HNE_0249	flgK	-	flagellar hook-associated protein FlgK	2.867	4.29837
239061	239070	HNE_0249	flgK	-	flagellar hook-associated protein FlgK	2.64726	4.08985
239071	239080	HNE_0249	flgK	-	flagellar hook-associated protein FlgK	2.71005	4.03603
239081	239090	HNE_0249	flgK	-	flagellar hook-associated protein FlgK	2.68912	4.14366
239091	239100	HNE_0249	flgK	-	flagellar hook-associated protein FlgK	2.64726	4.16384
239101	239110	HNE_0249	flgK	-	flagellar hook-associated protein FlgK	2.68912	4.32528
239111	239120	HNE_0249	flgK	-	flagellar hook-associated protein FlgK	2.96117	4.37237
239121	239130	HNE_0249	flgK	-	flagellar hook-associated protein FlgK	2.85653	4.54054
239131	239140	HNE_0249	flgK	-	flagellar hook-associated protein FlgK	2.78329	4.35219
239141	239150	HNE_0249	flgK	-	flagellar hook-associated protein FlgK	2.76236	4.06294
239151	239160	HNE_0249	flgK	-	flagellar hook-associated protein FlgK	2.68912	3.76696
239161	239170	HNE_0249	flgK	-	flagellar hook-associated protein FlgK	2.62634	3.37681
239171	239180	HNE_0249	flgK	-	flagellar hook-associated protein FlgK	2.56356	3.30955
239181	239190	HNE_0249	flgK	-	flagellar hook-associated protein FlgK	2.66819	3.31627
239191	239200	HNE_0249	flgK	-	flagellar hook-associated protein FlgK	3.02395	3.78042
239201	239210	HNE_0249	flgK	-	flagellar hook-associated protein FlgK	3.0658	3.95531
239211	239220	HNE_0249	flgK	-	flagellar hook-associated protein FlgK	3.00302	4.39255
239221	239230	HNE_0249	flgK	-	flagellar hook-associated protein FlgK	2.94024	4.56744
239231	239240	HNE_0249	flgK	-	flagellar hook-associated protein FlgK	2.82514	4.77597
239241	239250	HNE_0249	flgK	-	flagellar hook-associated protein FlgK	2.95071	4.91723
239251	239260	HNE_0249	flgK	-	flagellar hook-associated protein FlgK	2.5217	4.77597
239261	239270	HNE_0249	flgK	-	flagellar hook-associated protein FlgK	2.31243	4.68852
239271	239280	HNE_0249	flgK	-	flagellar hook-associated protein FlgK	2.31243	4.64816
239281	239290	HNE_0249	flgK	-	flagellar hook-associated protein FlgK	2.37521	4.68852
239291	239300	HNE_0249	flgK	-	flagellar hook-associated protein FlgK	2.33336	4.52036
239301	239310	HNE_0249	flgK	-	flagellar hook-associated protein FlgK	1.99853	4.18402
239311	239320	HNE_0249	flgK	-	flagellar hook-associated protein FlgK	2.11363	4.02258
239321	239330	HNE_0249	flgK	-	flagellar hook-associated protein FlgK	2.27058	4.17729
239331	239340	HNE_0249	flgK	-	flagellar hook-associated protein FlgK	2.46939	4.13021
239341	239350	HNE_0249	flgK	-	flagellar hook-associated protein FlgK	2.44846	4.05621
239351	239360	HNE_0249	flgK	-	flagellar hook-associated protein FlgK	2.64726	4.17729
239361	239370	HNE_0249	flgK	-	flagellar hook-associated protein FlgK	2.83561	4.31855
239371	239380	HNE_0249	flgK	-	flagellar hook-associated protein FlgK	2.77283	4.34546
239381	239390	HNE_0249	flgK	-	flagellar hook-associated protein FlgK	2.88792	4.36564
239391	239400	HNE_0249	flgK	-	flagellar hook-associated protein FlgK	2.7519	4.0293
239401	239410	HNE_0249	flgK	-	flagellar hook-associated protein FlgK	2.74144	3.94186
239411	239420	HNE_0249	flgK	-	flagellar hook-associated protein FlgK	2.85653	3.76696
239421	239430	HNE_0249	flgK	-	flagellar hook-associated protein FlgK	2.83561	3.67279
239431	239440	HNE_0249	flgK	-	flagellar hook-associated protein FlgK	2.71005	3.60552
239441	239450	HNE_0249	flgK	-	flagellar hook-associated protein FlgK	2.71005	3.61897
239451	239460	HNE_0249	flgK	-	flagellar hook-associated protein FlgK	2.80422	3.56516
239461	239470	HNE_0249	flgK	-	flagellar hook-associated protein FlgK	2.84607	3.48444
239471	239480	HNE_0249	flgK	-	flagellar hook-associated protein FlgK	2.54263	3.34991
239481	239490	HNE_0249	flgK	-	flagellar hook-associated protein FlgK	2.71005	3.24901
239491	239500	HNE_0249	flgK	-	flagellar hook-associated protein FlgK	2.74144	3.06066
239501	239510	HNE_0249	flgK	-	flagellar hook-associated protein FlgK	2.88792	3.18174
239511	239520	HNE_0249	flgK	-	flagellar hook-associated protein FlgK	2.79375	3.6257
239521	239530	HNE_0249	flgK	-	flagellar hook-associated protein FlgK	3.02395	4.00912
239531	239540	HNE_0249	flgK	-	flagellar hook-associated protein FlgK	3.05534	3.81405
239541	239550	HNE_0249	flgK	-	flagellar hook-associated protein FlgK	3.04488	3.59207
239551	239560	HNE_0249	flgK	-	flagellar hook-associated protein FlgK	3.09719	3.15483
239561	239570	HNE_0249	flgK	-	flagellar hook-associated protein FlgK	3.28554	2.67051
239571	239580	HNE_0249	flgK	-	flagellar hook-associated protein FlgK	3.20183	2.11892
239581	239590	HNE_0249	flgK	-	flagellar hook-associated protein FlgK	2.99256	1.94402
239591	239600	HNE_0249	flgK	-	flagellar hook-associated protein FlgK	3.05534	2.03147
239601	239610	HNE_0249	flgK	-	flagellar hook-associated protein FlgK	3.02395	2.42162
239611	239620	HNE_0249	flgK	-	flagellar hook-associated protein FlgK	3.19137	3.01357
239621	239630	HNE_0249	flgK	-	flagellar hook-associated protein FlgK	3.20183	3.8006
239631	239640	HNE_0249	flgK	-	flagellar hook-associated protein FlgK	3.14951	4.23111
239641	239650	HNE_0249	flgK	-	flagellar hook-associated protein FlgK	3.30646	4.24456
239651	239660	HNE_0249	flgK	-	flagellar hook-associated protein FlgK	3.15998	4.04276
239661	239670	HNE_0249	flgK	-	flagellar hook-associated protein FlgK	3.13905	4.11675
239671	239680	HNE_0249	flgK	-	flagellar hook-associated protein FlgK	2.99256	3.99567
239681	239690	HNE_0249	flgK	-	flagellar hook-associated protein FlgK	2.97163	3.7266
239691	239700	HNE_0249	flgK	-	flagellar hook-associated protein FlgK	3.12859	3.56516
239701	239710	HNE_0249	flgK	-	flagellar hook-associated protein FlgK	3.21229	3.65261
239711	239720	HNE_0249	flgK	-	flagellar hook-associated protein FlgK	3.5262	4.15711
239721	239730	HNE_0249	flgK	-	flagellar hook-associated protein FlgK	3.51573	4.04276
239731	239740	HNE_0249	flgK	-	flagellar hook-associated protein FlgK	3.40064	3.95531
239741	239750	HNE_0249	flgK	-	flagellar hook-associated protein FlgK	3.33786	3.8275
239751	239760	HNE_0249	flgK	-	flagellar hook-associated protein FlgK	3.24368	3.84096
239761	239770	HNE_0249	flgK	-	flagellar hook-associated protein FlgK	3.13905	3.93513
239771	239780	HNE_0249	flgK	-	flagellar hook-associated protein FlgK	2.99256	3.82078
239781	239790	HNE_0249	flgK	-	flagellar hook-associated protein FlgK	3.12859	4.17057
239791	239800	HNE_0249	flgK	-	flagellar hook-associated protein FlgK	3.296	4.64816
239801	239810	HNE_0249	flgK	-	flagellar hook-associated protein FlgK	3.32739	4.76924
239811	239820	HNE_0249	flgK	-	flagellar hook-associated protein FlgK	3.296	4.86342
239821	239830	HNE_0249	flgK	-	flagellar hook-associated protein FlgK	3.09719	4.76924
239831	239840	HNE_0249	flgK	-	flagellar hook-associated protein FlgK	3.00302	4.56744
239841	239850	HNE_0249	flgK	-	flagellar hook-associated protein FlgK	2.80422	4.25801
239851	239860	HNE_0249	flgK	-	flagellar hook-associated protein FlgK	2.68912	4.1033
239861	239870	HNE_0249	flgK	-	flagellar hook-associated protein FlgK	2.41707	4.2042
239871	239880	HNE_0249	flgK	-	flagellar hook-associated protein FlgK	2.53217	4.29165
239881	239890	HNE_0249	flgK	-	flagellar hook-associated protein FlgK	2.57402	4.39255
239891	239900	HNE_0249	flgK	-	flagellar hook-associated protein FlgK	2.49031	4.406
239901	239910	HNE_0249	flgK	-	flagellar hook-associated protein FlgK	2.4066	4.39255
239911	239920	HNE_0249	flgK	-	flagellar hook-associated protein FlgK	2.14502	4.11675
239921	239930	HNE_0249	flgK	-	flagellar hook-associated protein FlgK	2.19733	4.11003
239931	239940	HNE_0249	flgK	-	flagellar hook-associated protein FlgK	2.35429	4.15039
239941	239950	HNE_0249	flgK	-	flagellar hook-associated protein FlgK	2.43799	4.27147
239951	239960	HNE_0249	flgK	-	flagellar hook-associated protein FlgK	2.42753	4.29165
239961	239970	HNE_0249	flgK	-	flagellar hook-associated protein FlgK	2.60541	4.28492
239971	239980	HNE_0249	flgK	-	flagellar hook-associated protein FlgK	2.89839	4.47327
239981	239990	HNE_0249	flgK	-	flagellar hook-associated protein FlgK	2.96117	4.49345
239991	240000	HNE_0249	flgK	-	flagellar hook-associated protein FlgK	2.78329	4.52036
240001	240010	HNE_0249	flgK	-	flagellar hook-associated protein FlgK	2.85653	4.54054
240011	240020	HNE_0249	flgK	-	flagellar hook-associated protein FlgK	2.76236	4.50018
240021	240030	HNE_0249	flgK	-	flagellar hook-associated protein FlgK	2.64726	4.45309
240031	240040	HNE_0249	flgK	-	flagellar hook-associated protein FlgK	2.56356	4.37237
240041	240050	HNE_0249	flgK	-	flagellar hook-associated protein FlgK	2.65773	4.5069
240051	240060	HNE_0249	flgK	-	flagellar hook-associated protein FlgK	2.7519	4.6078
240061	240070	HNE_0249	flgK	-	flagellar hook-associated protein FlgK	2.97163	4.59435
240071	240080	HNE_0249	flgK	-	flagellar hook-associated protein FlgK	2.92978	4.39255
240081	240090	HNE_0249	flgK	-	flagellar hook-associated protein FlgK	3.1809	4.38582
240091	240100	HNE_0249	flgK	-	flagellar hook-associated protein FlgK	3.1809	4.14366
240101	240110	HNE_0249	flgK	-	flagellar hook-associated protein FlgK	3.33786	4.12348
240111	240120					3.20183	3.70642
240121	240130					3.26461	3.37681
240131	240140	HNE_0250	flgE	-	flagellar hook protein FlgE	3.5262	3.41045
240141	240150	HNE_0250	flgE	-	flagellar hook protein FlgE	3.51573	3.40372
240151	240160	HNE_0250	flgE	-	flagellar hook protein FlgE	3.34832	3.30955
240161	240170	HNE_0250	flgE	-	flagellar hook protein FlgE	3.25415	3.21537
240171	240180	HNE_0250	flgE	-	flagellar hook protein FlgE	3.42156	3.45081
240181	240190	HNE_0250	flgE	-	flagellar hook protein FlgE	3.33786	3.65934
240191	240200	HNE_0250	flgE	-	flagellar hook protein FlgE	3.07627	3.82078
240201	240210	HNE_0250	flgE	-	flagellar hook protein FlgE	3.11812	3.88132
240211	240220	HNE_0250	flgE	-	flagellar hook protein FlgE	3.10766	3.6997
240221	240230	HNE_0250	flgE	-	flagellar hook protein FlgE	3.08673	3.45753
240231	240240	HNE_0250	flgE	-	flagellar hook protein FlgE	3.00302	3.13465
240241	240250	HNE_0250	flgE	-	flagellar hook protein FlgE	2.9821	3.04048
240251	240260	HNE_0250	flgE	-	flagellar hook protein FlgE	3.08673	2.98666
240261	240270	HNE_0250	flgE	-	flagellar hook protein FlgE	3.28554	3.10102
240271	240280	HNE_0250	flgE	-	flagellar hook protein FlgE	3.33786	3.29609
240281	240290	HNE_0250	flgE	-	flagellar hook protein FlgE	3.5262	3.63916
240291	240300	HNE_0250	flgE	-	flagellar hook protein FlgE	3.70408	3.61897
240301	240310	HNE_0250	flgE	-	flagellar hook protein FlgE	3.77732	3.22883
240311	240320	HNE_0250	flgE	-	flagellar hook protein FlgE	3.6413	2.81177
240321	240330	HNE_0250	flgE	-	flagellar hook protein FlgE	3.57852	2.67723
240331	240340	HNE_0250	flgE	-	flagellar hook protein FlgE	3.36925	2.46871
240341	240350	HNE_0250	flgE	-	flagellar hook protein FlgE	2.84607	2.28036
240351	240360	HNE_0250	flgE	-	flagellar hook protein FlgE	2.61587	2.68396
240361	240370	HNE_0250	flgE	-	flagellar hook protein FlgE	2.69958	3.28937
240371	240380	HNE_0250	flgE	-	flagellar hook protein FlgE	2.7519	3.59207
240381	240390	HNE_0250	flgE	-	flagellar hook protein FlgE	2.69958	3.47771
240391	240400	HNE_0250	flgE	-	flagellar hook protein FlgE	2.87746	3.28937
240401	240410	HNE_0250	flgE	-	flagellar hook protein FlgE	3.03441	2.87231
240411	240420	HNE_0250	flgE	-	flagellar hook protein FlgE	2.88792	2.32744
240421	240430	HNE_0250	flgE	-	flagellar hook protein FlgE	2.94024	1.80276
240431	240440	HNE_0250	flgE	-	flagellar hook protein FlgE	2.91932	1.68168
240441	240450	HNE_0250	flgE	-	flagellar hook protein FlgE	2.96117	1.80949
240451	240460	HNE_0250	flgE	-	flagellar hook protein FlgE	2.84607	2.28708
240461	240470	HNE_0250	flgE	-	flagellar hook protein FlgE	2.74144	2.77141
240471	240480	HNE_0250	flgE	-	flagellar hook protein FlgE	2.72051	3.17501
240481	240490	HNE_0250	flgE	-	flagellar hook protein FlgE	2.58448	3.59879
240491	240500	HNE_0250	flgE	-	flagellar hook protein FlgE	2.59495	3.85441
240501	240510	HNE_0250	flgE	-	flagellar hook protein FlgE	2.37521	3.96204
240511	240520	HNE_0250	flgE	-	flagellar hook protein FlgE	2.4066	4.07639
240521	240530	HNE_0250	flgE	-	flagellar hook protein FlgE	2.51124	4.12348
240531	240540	HNE_0250	flgE	-	flagellar hook protein FlgE	2.72051	4.13693
240541	240550	HNE_0250	flgE	-	flagellar hook protein FlgE	2.62634	4.19075
240551	240560	HNE_0250	flgE	-	flagellar hook protein FlgE	2.85653	4.29165
240561	240570	HNE_0250	flgE	-	flagellar hook protein FlgE	2.91932	4.17057
240571	240580	HNE_0250	flgE	-	flagellar hook protein FlgE	3.03441	4.18402
240581	240590	HNE_0250	flgE	-	flagellar hook protein FlgE	3.17044	4.26474
240591	240600	HNE_0250	flgE	-	flagellar hook protein FlgE	3.11812	4.21765
240601	240610	HNE_0250	flgE	-	flagellar hook protein FlgE	3.10766	4.19747
240611	240620	HNE_0250	flgE	-	flagellar hook protein FlgE	3.02395	4.27147
240621	240630	HNE_0250	flgE	-	flagellar hook protein FlgE	3.08673	4.406
240631	240640	HNE_0250	flgE	-	flagellar hook protein FlgE	3.00302	4.39927
240641	240650	HNE_0250	flgE	-	flagellar hook protein FlgE	2.95071	4.57417
240651	240660	HNE_0250	flgE	-	flagellar hook protein FlgE	2.91932	4.59435
240661	240670	HNE_0250	flgE	-	flagellar hook protein FlgE	2.91932	4.53381
240671	240680	HNE_0250	flgE	-	flagellar hook protein FlgE	2.7519	4.39255
240681	240690	HNE_0250	flgE	-	flagellar hook protein FlgE	2.68912	4.23783
240691	240700	HNE_0250	flgE	-	flagellar hook protein FlgE	2.64726	4.27819
240701	240710	HNE_0250	flgE	-	flagellar hook protein FlgE	2.66819	4.39255
240711	240720	HNE_0250	flgE	-	flagellar hook protein FlgE	2.62634	4.50018
240721	240730	HNE_0250	flgE	-	flagellar hook protein FlgE	2.64726	4.43291
240731	240740	HNE_0250	flgE	-	flagellar hook protein FlgE	2.72051	4.17057
240741	240750	HNE_0250	flgE	-	flagellar hook protein FlgE	2.80422	3.97549
240751	240760	HNE_0250	flgE	-	flagellar hook protein FlgE	2.97163	3.81405
240761	240770	HNE_0250	flgE	-	flagellar hook protein FlgE	3.13905	3.61225
240771	240780	HNE_0250	flgE	-	flagellar hook protein FlgE	3.12859	3.59207
240781	240790	HNE_0250	flgE	-	flagellar hook protein FlgE	3.4111	4.02258
240791	240800	HNE_0250	flgE	-	flagellar hook protein FlgE	3.36925	4.19747
240801	240810	HNE_0250	flgE	-	flagellar hook protein FlgE	3.42156	4.5069
240811	240820	HNE_0250	flgE	-	flagellar hook protein FlgE	3.67269	4.66162
240821	240830	HNE_0250	flgE	-	flagellar hook protein FlgE	3.35878	4.18402
240831	240840	HNE_0250	flgE	-	flagellar hook protein FlgE	3.17044	4.03603
240841	240850	HNE_0250	flgE	-	flagellar hook protein FlgE	3.08673	4.1033
240851	240860	HNE_0250	flgE	-	flagellar hook protein FlgE	3.04488	4.27147
240861	240870	HNE_0250	flgE	-	flagellar hook protein FlgE	2.867	4.37237
240871	240880	HNE_0250	flgE	-	flagellar hook protein FlgE	2.60541	4.39927
240881	240890	HNE_0250	flgE	-	flagellar hook protein FlgE	2.71005	4.62126
240891	240900	HNE_0250	flgE	-	flagellar hook protein FlgE	2.94024	4.31183
240901	240910	HNE_0250	flgE	-	flagellar hook protein FlgE	2.88792	3.79387
240911	240920	HNE_0250	flgE	-	flagellar hook protein FlgE	3.00302	3.49789
240921	240930	HNE_0250	flgE	-	flagellar hook protein FlgE	2.97163	3.15483
240931	240940	HNE_0250	flgE	-	flagellar hook protein FlgE	3.09719	2.96648
240941	240950	HNE_0250	flgE	-	flagellar hook protein FlgE	3.23322	3.03375
240951	240960	HNE_0250	flgE	-	flagellar hook protein FlgE	3.0658	3.2221
240961	240970	HNE_0250	flgE	-	flagellar hook protein FlgE	2.74144	3.20864
240971	240980	HNE_0250	flgE	-	flagellar hook protein FlgE	2.51124	3.23555
240981	240990	HNE_0250	flgE	-	flagellar hook protein FlgE	2.64726	3.49117
240991	241000	HNE_0250	flgE	-	flagellar hook protein FlgE	2.66819	3.74006
241001	241010	HNE_0250	flgE	-	flagellar hook protein FlgE	2.49031	3.71988
241011	241020	HNE_0250	flgE	-	flagellar hook protein FlgE	2.60541	3.79387
241021	241030	HNE_0250	flgE	-	flagellar hook protein FlgE	2.78329	3.89477
241031	241040	HNE_0250	flgE	-	flagellar hook protein FlgE	2.77283	3.87459
241041	241050	HNE_0250	flgE	-	flagellar hook protein FlgE	2.7519	3.41717
241051	241060	HNE_0250	flgE	-	flagellar hook protein FlgE	2.65773	2.85886
241061	241070	HNE_0250	flgE	-	flagellar hook protein FlgE	2.80422	2.38126
241071	241080	HNE_0250	flgE	-	flagellar hook protein FlgE	2.87746	1.88348
241081	241090	HNE_0250	flgE	-	flagellar hook protein FlgE	3.12859	1.55387
241091	241100	HNE_0250	flgE	-	flagellar hook protein FlgE	3.15998	1.39243
241101	241110	HNE_0250	flgE	-	flagellar hook protein FlgE	3.17044	1.53369
241111	241120	HNE_0250	flgE	-	flagellar hook protein FlgE	3.19137	1.90366
241121	241130	HNE_0250	flgE	-	flagellar hook protein FlgE	3.19137	2.41489
241131	241140	HNE_0250	flgE	-	flagellar hook protein FlgE	3.01349	2.66378
241141	241150	HNE_0250	flgE	-	flagellar hook protein FlgE	3.01349	3.06066
241151	241160	HNE_0250	flgE	-	flagellar hook protein FlgE	2.9821	3.15483
241161	241170	HNE_0250	flgE	-	flagellar hook protein FlgE	3.03441	3.11447
241171	241180	HNE_0250	flgE	-	flagellar hook protein FlgE	3.24368	2.89922
241181	241190	HNE_0250	flgE	-	flagellar hook protein FlgE	3.24368	2.67051
241191	241200	HNE_0250	flgE	-	flagellar hook protein FlgE	3.34832	2.19291
241201	241210	HNE_0250	flgE	-	flagellar hook protein FlgE	3.21229	1.60769
241211	241220	HNE_0250	flgE	-	flagellar hook protein FlgE	3.296	1.3588
241221	241230	HNE_0250	flgE	-	flagellar hook protein FlgE	3.46342	1.41934
241231	241240	HNE_0250	flgE	-	flagellar hook protein FlgE	3.59944	1.41261
241241	241250	HNE_0250	flgE	-	flagellar hook protein FlgE	3.81918	1.68168
241251	241260	HNE_0250	flgE	-	flagellar hook protein FlgE	4.02845	1.9642
241261	241270	HNE_0250	flgE	-	flagellar hook protein FlgE	4.39467	2.0651
241271	241280	HNE_0250	flgE	-	flagellar hook protein FlgE	5.71307	1.98438
241281	241290	HNE_0250	flgE	-	flagellar hook protein FlgE	6.79081	1.65477
241291	241300	HNE_0250	flgE	-	flagellar hook protein FlgE	8.29755	1.27808
241301	241310	HNE_0250	flgE	-	flagellar hook protein FlgE	9.8043	0.948467
241311	241320	HNE_0250	flgE	-	flagellar hook protein FlgE	11.7296	0.807206
241321	241330	HNE_0250	flgE	-	flagellar hook protein FlgE	13.1631	0.84084
241331	241340	HNE_0250	flgE	-	flagellar hook protein FlgE	15.1511	1.02919
241341	241350	HNE_0250	flgE	-	flagellar hook protein FlgE	16.8985	1.16372
241351	241360	HNE_0250	flgE	-	flagellar hook protein FlgE	19.7446	1.2848
241361	241370	HNE_0250	flgE	-	flagellar hook protein FlgE	22.4023	1.37898
241371	241380	HNE_0250	flgE	-	flagellar hook protein FlgE	24.5264	1.51351
241381	241390	HNE_0250	flgE	-	flagellar hook protein FlgE	31.1917	1.40588
241391	241400	HNE_0250	flgE	-	flagellar hook protein FlgE	38.1499	1.2579
241401	241410	HNE_0250	flgE	-	flagellar hook protein FlgE	45.5162	1.04937
241411	241420	HNE_0250	flgE	-	flagellar hook protein FlgE	49.7225	0.807206
241421	241430	HNE_0250	flgE	-	flagellar hook protein FlgE	54.2428	0.585225
241431	241440	HNE_0250	flgE	-	flagellar hook protein FlgE	62.9484	0.269069
241441	241450					63.2728	0.168168
241451	241460					65.1353	0.0403603
241461	241470					63.3879	0.0403603
241471	241480					64.3086	0.0605405
241481	241490					60.9185	0.0605405
241491	241500					59.2443	0.0941741
241501	241510					57.7794	0.215255
241511	241520					56.8063	0.295976
241521	241530					59.2443	0.551591
241531	241540					61.2324	0.80048
241541	241550					63.3774	0.90138
241551	241560	HNE_0251	HNE_0251	-	putative chemotaxis MotB protein	59.7256	1.00901
241561	241570	HNE_0251	HNE_0251	-	putative chemotaxis MotB protein	57.9259	1.08973
241571	241580	HNE_0251	HNE_0251	-	putative chemotaxis MotB protein	50.9572	1.33189
241581	241590	HNE_0251	HNE_0251	-	putative chemotaxis MotB protein	43.863	1.39916
241591	241600	HNE_0251	HNE_0251	-	putative chemotaxis MotB protein	37.5012	1.47988
241601	241610	HNE_0251	HNE_0251	-	putative chemotaxis MotB protein	31.0033	1.67495
241611	241620	HNE_0251	HNE_0251	-	putative chemotaxis MotB protein	27.2993	1.83639
241621	241630	HNE_0251	HNE_0251	-	putative chemotaxis MotB protein	23.4801	1.82294
241631	241640	HNE_0251	HNE_0251	-	putative chemotaxis MotB protein	20.1527	1.84985
241641	241650	HNE_0251	HNE_0251	-	putative chemotaxis MotB protein	16.5323	1.78258
241651	241660	HNE_0251	HNE_0251	-	putative chemotaxis MotB protein	14.2408	1.9373
241661	241670	HNE_0251	HNE_0251	-	putative chemotaxis MotB protein	11.9493	1.97093
241671	241680	HNE_0251	HNE_0251	-	putative chemotaxis MotB protein	9.82522	1.92384
241681	241690	HNE_0251	HNE_0251	-	putative chemotaxis MotB protein	7.58603	2.0382
241691	241700	HNE_0251	HNE_0251	-	putative chemotaxis MotB protein	6.24671	2.10546
241701	241710	HNE_0251	HNE_0251	-	putative chemotaxis MotB protein	5.16897	2.01802
241711	241720	HNE_0251	HNE_0251	-	putative chemotaxis MotB protein	4.73996	1.91711
241721	241730	HNE_0251	HNE_0251	-	putative chemotaxis MotB protein	4.0703	1.99784
241731	241740	HNE_0251	HNE_0251	-	putative chemotaxis MotB protein	3.44249	2.09874
241741	241750	HNE_0251	HNE_0251	-	putative chemotaxis MotB protein	3.13905	1.91039
241751	241760	HNE_0251	HNE_0251	-	putative chemotaxis MotB protein	2.89839	1.61441
241761	241770	HNE_0251	HNE_0251	-	putative chemotaxis MotB protein	2.78329	1.36552
241771	241780	HNE_0251	HNE_0251	-	putative chemotaxis MotB protein	2.67865	1.27135
241781	241790	HNE_0251	HNE_0251	-	putative chemotaxis MotB protein	2.78329	0.975374
241791	241800	HNE_0251	HNE_0251	-	putative chemotaxis MotB protein	2.85653	0.739939
241801	241810	HNE_0251	HNE_0251	-	putative chemotaxis MotB protein	2.95071	0.780299
241811	241820	HNE_0251	HNE_0251	-	putative chemotaxis MotB protein	3.02395	0.894654
241821	241830	HNE_0251	HNE_0251	-	putative chemotaxis MotB protein	3.5262	1.19063
241831	241840	HNE_0251	HNE_0251	-	putative chemotaxis MotB protein	3.53666	1.32516
241841	241850	HNE_0251	HNE_0251	-	putative chemotaxis MotB protein	3.54712	1.40588
241851	241860	HNE_0251	HNE_0251	-	putative chemotaxis MotB protein	3.67269	1.41934
241861	241870	HNE_0251	HNE_0251	-	putative chemotaxis MotB protein	3.4111	1.24444
241871	241880	HNE_0251	HNE_0251	-	putative chemotaxis MotB protein	3.32739	1.083
241881	241890	HNE_0251	HNE_0251	-	putative chemotaxis MotB protein	3.02395	0.659218
241891	241900	HNE_0251	HNE_0251	-	putative chemotaxis MotB protein	3.32739	0.396876
241901	241910	HNE_0251	HNE_0251	-	putative chemotaxis MotB protein	3.296	0.195075
241911	241920	HNE_0251	HNE_0251	-	putative chemotaxis MotB protein	3.25415	0.0874473
241921	241930	HNE_0251	HNE_0251	-	putative chemotaxis MotB protein	3.47388	0.228708
241931	241940	HNE_0251	HNE_0251	-	putative chemotaxis MotB protein	3.69361	0.36997
241941	241950	HNE_0251	HNE_0251	-	putative chemotaxis MotB protein	3.53666	0.544864
241951	241960	HNE_0251	HNE_0251	-	putative chemotaxis MotB protein	3.58898	0.625585
241961	241970	HNE_0251	HNE_0251	-	putative chemotaxis MotB protein	3.5262	0.639038
241971	241980	HNE_0251	HNE_0251	-	putative chemotaxis MotB protein	3.725	0.591951
241981	241990	HNE_0251	HNE_0251	-	putative chemotaxis MotB protein	3.78779	0.544864
241991	242000	HNE_0251	HNE_0251	-	putative chemotaxis MotB protein	3.6413	0.45069
242001	242010	HNE_0251	HNE_0251	-	putative chemotaxis MotB protein	3.69361	0.343063
242011	242020	HNE_0251	HNE_0251	-	putative chemotaxis MotB protein	3.77732	0.497777
242021	242030	HNE_0251	HNE_0251	-	putative chemotaxis MotB protein	3.94474	0.699579
242031	242040	HNE_0251	HNE_0251	-	putative chemotaxis MotB protein	3.76686	0.854293
242041	242050	HNE_0251	HNE_0251	-	putative chemotaxis MotB protein	3.89242	0.874473
242051	242060	HNE_0251	HNE_0251	-	putative chemotaxis MotB protein	4.10169	0.961921
242061	242070	HNE_0251	HNE_0251	-	putative chemotaxis MotB protein	4.21679	1.04937
242071	242080	HNE_0251	HNE_0251	-	putative chemotaxis MotB protein	3.79825	0.928287
242081	242090	HNE_0251	HNE_0251	-	putative chemotaxis MotB protein	3.65176	0.968648
242091	242100	HNE_0251	HNE_0251	-	putative chemotaxis MotB protein	3.94474	1.00901
242101	242110	HNE_0251	HNE_0251	-	putative chemotaxis MotB protein	3.78779	1.02246
242111	242120	HNE_0251	HNE_0251	-	putative chemotaxis MotB protein	3.5262	0.847567
242121	242130	HNE_0251	HNE_0251	-	putative chemotaxis MotB protein	3.40064	0.719759
242131	242140	HNE_0251	HNE_0251	-	putative chemotaxis MotB protein	3.60991	0.645765
242141	242150	HNE_0251	HNE_0251	-	putative chemotaxis MotB protein	3.69361	0.551591
242151	242160	HNE_0251	HNE_0251	-	putative chemotaxis MotB protein	3.45295	0.699579
242161	242170	HNE_0251	HNE_0251	-	putative chemotaxis MotB protein	3.71454	1.083
242171	242180	HNE_0251	HNE_0251	-	putative chemotaxis MotB protein	3.90288	1.43952
242181	242190	HNE_0251	HNE_0251	-	putative chemotaxis MotB protein	3.77732	1.55387
242191	242200	HNE_0251	HNE_0251	-	putative chemotaxis MotB protein	3.80871	1.51351
242201	242210	HNE_0251	HNE_0251	-	putative chemotaxis MotB protein	3.55759	1.3857
242211	242220	HNE_0251	HNE_0251	-	putative chemotaxis MotB protein	3.43203	1.083
242221	242230	HNE_0251	HNE_0251	-	putative chemotaxis MotB protein	3.15998	0.827386
242231	242240	HNE_0251	HNE_0251	-	putative chemotaxis MotB protein	3.45295	0.780299
242241	242250	HNE_0251	HNE_0251	-	putative chemotaxis MotB protein	3.5262	0.692852
242251	242260	HNE_0251	HNE_0251	-	putative chemotaxis MotB protein	3.92381	0.787026
242261	242270	HNE_0251	HNE_0251	-	putative chemotaxis MotB protein	4.16447	0.793753
242271	242280	HNE_0251	HNE_0251	-	putative chemotaxis MotB protein	5.32592	0.706305
242281	242290	HNE_0251	HNE_0251	-	putative chemotaxis MotB protein	6.87452	0.504504
242291	242300	HNE_0251	HNE_0251	-	putative chemotaxis MotB protein	8.22431	0.43051
242301	242310	HNE_0251	HNE_0251	-	putative chemotaxis MotB protein	9.89847	0.612131
242311	242320	HNE_0251	HNE_0251	-	putative chemotaxis MotB protein	12.326	0.807206
242321	242330	HNE_0251	HNE_0251	-	putative chemotaxis MotB protein	16.3231	1.05609
242331	242340	HNE_0251	HNE_0251	-	putative chemotaxis MotB protein	17.903	1.10991
242341	242350	HNE_0251	HNE_0251	-	putative chemotaxis MotB protein	21.0421	1.08973
242351	242360	HNE_0251	HNE_0251	-	putative chemotaxis MotB protein	25.7402	0.921561
242361	242370	HNE_0251	HNE_0251	-	putative chemotaxis MotB protein	33.117	0.713032
242371	242380	HNE_0251	HNE_0251	-	putative chemotaxis MotB protein	40.0961	0.464144
242381	242390	HNE_0251	HNE_0251	-	putative chemotaxis MotB protein	43.8734	0.275795
242391	242400	HNE_0251	HNE_0251	-	putative chemotaxis MotB protein	51.8362	0.282522
242401	242410	HNE_0251	HNE_0251	-	putative chemotaxis MotB protein	55.5298	0.309429
242411	242420	HNE_0251	HNE_0251	-	putative chemotaxis MotB protein	58.8781	0.343063
242421	242430					65.1562	0.329609
242431	242440					66.0247	0.275795
242441	242450					72.2714	0.168168
242451	242460					70.7437	0.208528
242461	242470					74.1129	0.215255
242471	242480					71.8424	0.316156
242481	242490					68.5464	0.417057
242491	242500					70.6181	0.49105
242501	242510					74.1862	0.504504
242511	242520					75.7662	0.376696
242521	242530					74.7617	0.343063
242531	242540					74.8663	0.215255
242541	242550					73.0352	0.127808
242551	242560					69.6032	0.0807206
242561	242570					59.6419	0.208528
242571	242580					55.331	0.302702
242581	242590					49.011	0.484324
242591	242600					45.2442	0.713032
242601	242610					41.3936	1.03591
242611	242620					31.2021	1.07628
242621	242630					30.6371	1.06282
242631	242640					28.6386	0.955194
242641	242650					26.3471	0.834113
242651	242660					25.2275	0.719759
242661	242670					21.1467	0.780299
242671	242680					21.0421	1.04937
242681	242690					19.6504	1.23099
242691	242700					18.6355	1.74895
242701	242710					18.2588	2.15255
242711	242720					14.7535	2.37453
242721	242730	HNE_0252	HNE_0252	+	SPOA family protein	13.0584	2.46871
242731	242740	HNE_0252	HNE_0252	+	SPOA family protein	10.5681	2.50234
242741	242750	HNE_0252	HNE_0252	+	SPOA family protein	8.08828	2.70414
242751	242760	HNE_0252	HNE_0252	+	SPOA family protein	5.80724	2.36781
242761	242770	HNE_0252	HNE_0252	+	SPOA family protein	4.94923	1.95748
242771	242780	HNE_0252	HNE_0252	+	SPOA family protein	4.8446	1.64132
242781	242790	HNE_0252	HNE_0252	+	SPOA family protein	4.45745	1.3588
242791	242800	HNE_0252	HNE_0252	+	SPOA family protein	4.4156	1.50006
242801	242810	HNE_0252	HNE_0252	+	SPOA family protein	4.10169	1.72204
242811	242820	HNE_0252	HNE_0252	+	SPOA family protein	3.75639	2.38799
242821	242830	HNE_0252	HNE_0252	+	SPOA family protein	3.67269	3.01357
242831	242840	HNE_0252	HNE_0252	+	SPOA family protein	3.45295	3.45081
242841	242850	HNE_0252	HNE_0252	+	SPOA family protein	3.24368	3.60552
242851	242860	HNE_0252	HNE_0252	+	SPOA family protein	3.24368	3.45753
242861	242870	HNE_0252	HNE_0252	+	SPOA family protein	3.36925	3.26246
242871	242880	HNE_0252	HNE_0252	+	SPOA family protein	3.26461	2.79159
242881	242890	HNE_0252	HNE_0252	+	SPOA family protein	3.13905	2.50234
242891	242900	HNE_0252	HNE_0252	+	SPOA family protein	3.34832	2.33417
242901	242910	HNE_0252	HNE_0252	+	SPOA family protein	3.33786	2.36108
242911	242920	HNE_0252	HNE_0252	+	SPOA family protein	3.09719	2.34762
242921	242930	HNE_0252	HNE_0252	+	SPOA family protein	3.02395	2.35435
242931	242940	HNE_0252	HNE_0252	+	SPOA family protein	3.07627	2.54943
242941	242950	HNE_0252	HNE_0252	+	SPOA family protein	3.13905	2.75795
242951	242960	HNE_0252	HNE_0252	+	SPOA family protein	2.9821	2.82522
242961	242970	HNE_0252	HNE_0252	+	SPOA family protein	2.9821	2.83868
242971	242980	HNE_0252	HNE_0252	+	SPOA family protein	3.04488	2.9463
242981	242990	HNE_0252	HNE_0252	+	SPOA family protein	3.07627	3.15483
242991	243000	HNE_0252	HNE_0252	+	SPOA family protein	2.88792	3.12792
243001	243010	HNE_0252	HNE_0252	+	SPOA family protein	3.0658	3.10102
243011	243020	HNE_0252	HNE_0252	+	SPOA family protein	3.22276	3.13465
243021	243030	HNE_0252	HNE_0252	+	SPOA family protein	3.20183	2.85213
243031	243040	HNE_0252	HNE_0252	+	SPOA family protein	2.99256	2.24
243041	243050	HNE_0252	HNE_0252	+	SPOA family protein	2.94024	1.6615
243051	243060	HNE_0252	HNE_0252	+	SPOA family protein	3.09719	1.31844
243061	243070	HNE_0252	HNE_0252	+	SPOA family protein	3.22276	1.12336
243071	243080	HNE_0252	HNE_0252	+	SPOA family protein	3.45295	0.8812
243081	243090	HNE_0252	HNE_0252	+	SPOA family protein	3.62037	0.84084
243091	243100	HNE_0252	HNE_0252	+	SPOA family protein	3.53666	0.914834
243101	243110	HNE_0252	HNE_0252	+	SPOA family protein	3.66222	1.14354
243111	243120	HNE_0252	HNE_0252	+	SPOA family protein	3.71454	1.33862
243121	243130	HNE_0252	HNE_0252	+	SPOA family protein	3.48434	1.27135
243131	243140	HNE_0252	HNE_0252	+	SPOA family protein	3.79825	1.54042
243141	243150	HNE_0252	HNE_0252	+	SPOA family protein	3.78779	1.80949
243151	243160	HNE_0252	HNE_0252	+	SPOA family protein	3.82964	1.99111
243161	243170	HNE_0252	HNE_0252	+	SPOA family protein	3.90288	1.89021
243171	243180	HNE_0252	HNE_0252	+	SPOA family protein	4.33189	1.92384
243181	243190	HNE_0252	HNE_0252	+	SPOA family protein	4.68765	1.84985
243191	243200	HNE_0252	HNE_0252	+	SPOA family protein	4.55162	1.56733
243201	243210	HNE_0252	HNE_0252	+	SPOA family protein	4.56208	1.19736
243211	243220	HNE_0252	HNE_0252	+	SPOA family protein	4.94923	0.948467
243221	243230	HNE_0252	HNE_0252	+	SPOA family protein	5.22128	0.659218
243231	243240	HNE_0252	HNE_0252	+	SPOA family protein	4.92831	0.484324
243241	243250	HNE_0252	HNE_0252	+	SPOA family protein	5.22128	0.538138
243251	243260	HNE_0252	HNE_0252	+	SPOA family protein	5.20036	0.618858
243261	243270	HNE_0252	HNE_0252	+	SPOA family protein	5.48287	0.921561
243271	243280	HNE_0252	HNE_0252	+	SPOA family protein	5.1585	1.06282
243281	243290	HNE_0252	HNE_0252	+	SPOA family protein	5.21082	1.17718
243291	243300	HNE_0252	HNE_0252	+	SPOA family protein	5.734	1.16372
243301	243310	HNE_0252	HNE_0252	+	SPOA family protein	5.11665	1.08973
243311	243320	HNE_0252	HNE_0252	+	SPOA family protein	5.14804	0.975374
243321	243330	HNE_0252	HNE_0252	+	SPOA family protein	5.46194	0.686125
243331	243340	HNE_0252	HNE_0252	+	SPOA family protein	5.3887	0.565044
243341	243350	HNE_0252	HNE_0252	+	SPOA family protein	5.08526	0.504504
243351	243360	HNE_0252	HNE_0252	+	SPOA family protein	4.63533	0.43051
243361	243370	HNE_0252	HNE_0252	+	SPOA family protein	4.94923	0.497777
243371	243380	HNE_0252	HNE_0252	+	SPOA family protein	4.67718	0.591951
243381	243390	HNE_0252	HNE_0252	+	SPOA family protein	4.40513	0.746666
243391	243400	HNE_0252	HNE_0252	+	SPOA family protein	4.27957	0.961921
243401	243410	HNE_0252	HNE_0252	+	SPOA family protein	4.15401	1.09646
243411	243420	HNE_0252	HNE_0252	+	SPOA family protein	4.14354	1.14354
243421	243430	HNE_0252	HNE_0252	+	SPOA family protein	4.11215	1.02246
243431	243440	HNE_0252	HNE_0252	+	SPOA family protein	4.16447	0.921561
243441	243450	HNE_0252	HNE_0252	+	SPOA family protein	4.14354	0.894654
243451	243460	HNE_0252	HNE_0252	+	SPOA family protein	4.19586	0.746666
243461	243470	HNE_0252	HNE_0252	+	SPOA family protein	4.08076	0.645765
243471	243480					3.97613	0.699579
243481	243490					3.65176	0.739939
243491	243500					3.63083	0.665945
243501	243510					3.58898	0.524684
243511	243520					3.63083	0.47087
243521	243530					3.69361	0.383423
243531	243540					3.87149	0.174895
243541	243550	HNE_0253	HNE_0253	+	putative chemotaxis MotA protein	3.99706	0.141261
243551	243560	HNE_0253	HNE_0253	+	putative chemotaxis MotA protein	3.9552	0.195075
243561	243570	HNE_0253	HNE_0253	+	putative chemotaxis MotA protein	4.03891	0.316156
243571	243580	HNE_0253	HNE_0253	+	putative chemotaxis MotA protein	4.12262	0.403603
243581	243590	HNE_0253	HNE_0253	+	putative chemotaxis MotA protein	4.04937	0.437237
243591	243600	HNE_0253	HNE_0253	+	putative chemotaxis MotA protein	3.96566	0.423783
243601	243610	HNE_0253	HNE_0253	+	putative chemotaxis MotA protein	3.80871	0.36997
243611	243620	HNE_0253	HNE_0253	+	putative chemotaxis MotA protein	3.79825	0.322883
243621	243630	HNE_0253	HNE_0253	+	putative chemotaxis MotA protein	3.54712	0.255615
243631	243640	HNE_0253	HNE_0253	+	putative chemotaxis MotA protein	3.47388	0.443963
243641	243650	HNE_0253	HNE_0253	+	putative chemotaxis MotA protein	3.39017	0.612131
243651	243660	HNE_0253	HNE_0253	+	putative chemotaxis MotA protein	3.24368	0.84084
243661	243670	HNE_0253	HNE_0253	+	putative chemotaxis MotA protein	3.20183	1.04937
243671	243680	HNE_0253	HNE_0253	+	putative chemotaxis MotA protein	3.19137	1.21754
243681	243690	HNE_0253	HNE_0253	+	putative chemotaxis MotA protein	3.09719	1.31171
243691	243700	HNE_0253	HNE_0253	+	putative chemotaxis MotA protein	2.84607	1.21754
243701	243710	HNE_0253	HNE_0253	+	putative chemotaxis MotA protein	2.73097	1.31844
243711	243720	HNE_0253	HNE_0253	+	putative chemotaxis MotA protein	2.74144	1.2848
243721	243730	HNE_0253	HNE_0253	+	putative chemotaxis MotA protein	2.69958	1.16372
243731	243740	HNE_0253	HNE_0253	+	putative chemotaxis MotA protein	2.7519	1.01573
243741	243750	HNE_0253	HNE_0253	+	putative chemotaxis MotA protein	2.79375	0.807206
243751	243760	HNE_0253	HNE_0253	+	putative chemotaxis MotA protein	2.95071	0.639038
243761	243770	HNE_0253	HNE_0253	+	putative chemotaxis MotA protein	3.23322	0.343063
243771	243780	HNE_0253	HNE_0253	+	putative chemotaxis MotA protein	3.28554	0.201802
243781	243790	HNE_0253	HNE_0253	+	putative chemotaxis MotA protein	3.34832	0.188348
243791	243800	HNE_0253	HNE_0253	+	putative chemotaxis MotA protein	3.44249	0.396876
243801	243810	HNE_0253	HNE_0253	+	putative chemotaxis MotA protein	3.42156	0.652492
243811	243820	HNE_0253	HNE_0253	+	putative chemotaxis MotA protein	3.65176	1.00228
243821	243830	HNE_0253	HNE_0253	+	putative chemotaxis MotA protein	3.69361	1.22426
243831	243840	HNE_0253	HNE_0253	+	putative chemotaxis MotA protein	3.54712	1.26462
243841	243850	HNE_0253	HNE_0253	+	putative chemotaxis MotA protein	3.43203	1.21754
243851	243860	HNE_0253	HNE_0253	+	putative chemotaxis MotA protein	3.53666	0.982101
243861	243870	HNE_0253	HNE_0253	+	putative chemotaxis MotA protein	3.70408	0.726486
243871	243880	HNE_0253	HNE_0253	+	putative chemotaxis MotA protein	3.46342	0.349789
243881	243890	HNE_0253	HNE_0253	+	putative chemotaxis MotA protein	3.59944	0.161441
243891	243900	HNE_0253	HNE_0253	+	putative chemotaxis MotA protein	3.67269	0.134534
243901	243910	HNE_0253	HNE_0253	+	putative chemotaxis MotA protein	3.67269	0.141261
243911	243920	HNE_0253	HNE_0253	+	putative chemotaxis MotA protein	3.65176	0.181621
243921	243930	HNE_0253	HNE_0253	+	putative chemotaxis MotA protein	3.46342	0.221982
243931	243940	HNE_0253	HNE_0253	+	putative chemotaxis MotA protein	3.57852	0.242162
243941	243950	HNE_0253	HNE_0253	+	putative chemotaxis MotA protein	3.40064	0.322883
243951	243960	HNE_0253	HNE_0253	+	putative chemotaxis MotA protein	3.24368	0.343063
243961	243970	HNE_0253	HNE_0253	+	putative chemotaxis MotA protein	3.44249	0.316156
243971	243980	HNE_0253	HNE_0253	+	putative chemotaxis MotA protein	3.42156	0.289249
243981	243990	HNE_0253	HNE_0253	+	putative chemotaxis MotA protein	3.39017	0.275795
243991	244000	HNE_0253	HNE_0253	+	putative chemotaxis MotA protein	3.68315	0.295976
244001	244010	HNE_0253	HNE_0253	+	putative chemotaxis MotA protein	3.69361	0.208528
244011	244020	HNE_0253	HNE_0253	+	putative chemotaxis MotA protein	3.80871	0.457417
244021	244030	HNE_0253	HNE_0253	+	putative chemotaxis MotA protein	3.76686	0.894654
244031	244040	HNE_0253	HNE_0253	+	putative chemotaxis MotA protein	3.77732	1.37898
244041	244050	HNE_0253	HNE_0253	+	putative chemotaxis MotA protein	3.73547	1.78258
244051	244060	HNE_0253	HNE_0253	+	putative chemotaxis MotA protein	3.23322	2.12564
244061	244070	HNE_0253	HNE_0253	+	putative chemotaxis MotA protein	2.99256	2.30726
244071	244080	HNE_0253	HNE_0253	+	putative chemotaxis MotA protein	2.80422	2.15928
244081	244090	HNE_0253	HNE_0253	+	putative chemotaxis MotA protein	2.60541	1.72877
244091	244100	HNE_0253	HNE_0253	+	putative chemotaxis MotA protein	2.53217	1.42606
244101	244110	HNE_0253	HNE_0253	+	putative chemotaxis MotA protein	2.55309	1.30498
244111	244120	HNE_0253	HNE_0253	+	putative chemotaxis MotA protein	2.60541	1.41934
244121	244130	HNE_0253	HNE_0253	+	putative chemotaxis MotA protein	3.07627	1.68841
244131	244140	HNE_0253	HNE_0253	+	putative chemotaxis MotA protein	3.296	1.92384
244141	244150	HNE_0253	HNE_0253	+	putative chemotaxis MotA protein	3.24368	2.41489
244151	244160	HNE_0253	HNE_0253	+	putative chemotaxis MotA protein	3.26461	2.59651
244161	244170	HNE_0253	HNE_0253	+	putative chemotaxis MotA protein	3.28554	2.82522
244171	244180	HNE_0253	HNE_0253	+	putative chemotaxis MotA protein	3.40064	2.75123
244181	244190	HNE_0253	HNE_0253	+	putative chemotaxis MotA protein	3.35878	3.16156
244191	244200	HNE_0253	HNE_0253	+	putative chemotaxis MotA protein	3.21229	3.26919
244201	244210	HNE_0253	HNE_0253	+	putative chemotaxis MotA protein	3.31693	3.20192
244211	244220	HNE_0253	HNE_0253	+	putative chemotaxis MotA protein	3.32739	2.90594
244221	244230	HNE_0253	HNE_0253	+	putative chemotaxis MotA protein	3.296	2.40144
244231	244240	HNE_0253	HNE_0253	+	putative chemotaxis MotA protein	3.05534	2.01802
244241	244250	HNE_0253	HNE_0253	+	putative chemotaxis MotA protein	2.74144	1.39243
244251	244260	HNE_0253	HNE_0253	+	putative chemotaxis MotA protein	2.79375	1.26462
244261	244270	HNE_0253	HNE_0253	+	putative chemotaxis MotA protein	2.65773	1.34534
244271	244280	HNE_0253	HNE_0253	+	putative chemotaxis MotA protein	2.60541	1.6615
244281	244290	HNE_0253	HNE_0253	+	putative chemotaxis MotA protein	2.31243	2.03147
244291	244300	HNE_0253	HNE_0253	+	putative chemotaxis MotA protein	2.26012	2.52925
244301	244310	HNE_0253	HNE_0253	+	putative chemotaxis MotA protein	2.28104	2.89249
244311	244320	HNE_0253	HNE_0253	+	putative chemotaxis MotA protein	2.27058	3.06738
244321	244330	HNE_0253	HNE_0253	+	putative chemotaxis MotA protein	2.39614	3.10102
244331	244340	HNE_0253	HNE_0253	+	putative chemotaxis MotA protein	2.69958	3.44408
244341	244350	HNE_0253	HNE_0253	+	putative chemotaxis MotA protein	2.87746	3.5248
244351	244360	HNE_0253	HNE_0253	+	putative chemotaxis MotA protein	3.07627	3.51135
244361	244370	HNE_0253	HNE_0253	+	putative chemotaxis MotA protein	3.00302	3.4239
244371	244380	HNE_0253	HNE_0253	+	putative chemotaxis MotA protein	2.9821	3.20864
244381	244390	HNE_0253	HNE_0253	+	putative chemotaxis MotA protein	2.89839	2.93958
244391	244400	HNE_0253	HNE_0253	+	putative chemotaxis MotA protein	2.58448	2.91267
244401	244410	HNE_0253	HNE_0253	+	putative chemotaxis MotA protein	2.56356	3.00684
244411	244420	HNE_0254	HNE_0254	+	hypothetical protein	2.41707	3.11447
244421	244430	HNE_0254	HNE_0254	+	hypothetical protein	2.72051	3.5248
244431	244440	HNE_0254	HNE_0254	+	hypothetical protein	2.77283	3.9015
244441	244450	HNE_0254	HNE_0254	+	hypothetical protein	2.92978	4.406
244451	244460	HNE_0254	HNE_0254	+	hypothetical protein	3.0658	4.52036
244461	244470	HNE_0254	HNE_0254	+	hypothetical protein	3.05534	4.95087
244471	244480	HNE_0254	HNE_0254	+	hypothetical protein	3.09719	4.95759
244481	244490	HNE_0254	HNE_0254	+	hypothetical protein	2.7519	4.57417
244491	244500	HNE_0254	HNE_0254	+	hypothetical protein	2.85653	4.6818
244501	244510	HNE_0254	HNE_0254	+	hypothetical protein	3.00302	4.75579
244511	244520	HNE_0254	HNE_0254	+	hypothetical protein	2.96117	4.67507
244521	244530	HNE_0254	HNE_0254	+	hypothetical protein	3.02395	4.48672
244531	244540	HNE_0254	HNE_0254	+	hypothetical protein	3.17044	4.47999
244541	244550	HNE_0254	HNE_0254	+	hypothetical protein	3.12859	4.51363
244551	244560	HNE_0254	HNE_0254	+	hypothetical protein	3.0658	4.66834
244561	244570	HNE_0254	HNE_0254	+	hypothetical protein	3.04488	4.61453
244571	244580	HNE_0254	HNE_0254	+	hypothetical protein	3.08673	4.74906
244581	244590	HNE_0254	HNE_0254	+	hypothetical protein	2.81468	4.64144
244591	244600	HNE_0254	HNE_0254	+	hypothetical protein	2.84607	4.76924
244601	244610	HNE_0254	HNE_0254	+	hypothetical protein	2.99256	4.75579
244611	244620	HNE_0254	HNE_0254	+	hypothetical protein	2.90885	4.47327
244621	244630	HNE_0254	HNE_0254	+	hypothetical protein	2.82514	4.53381
244631	244640	HNE_0254	HNE_0254	+	hypothetical protein	2.79375	4.32528
244641	244650	HNE_0254	HNE_0254	+	hypothetical protein	3.04488	4.53381
244651	244660	HNE_0254	HNE_0254	+	hypothetical protein	3.17044	4.62126
244661	244670	HNE_0254	HNE_0254	+	hypothetical protein	3.00302	4.51363
244671	244680	HNE_0254	HNE_0254	+	hypothetical protein	3.05534	4.47327
244681	244690	HNE_0254	HNE_0254	+	hypothetical protein	3.11812	4.08312
244691	244700	HNE_0254	HNE_0254	+	hypothetical protein	3.0658	3.79387
244701	244710	HNE_0254	HNE_0254	+	hypothetical protein	3.34832	3.17501
244711	244720	HNE_0254	HNE_0254	+	hypothetical protein	3.37971	2.38799
244721	244730	HNE_0254	HNE_0254	+	hypothetical protein	3.47388	1.94402
244731	244740	HNE_0254	HNE_0254	+	hypothetical protein	3.60991	1.6615
244741	244750	HNE_0254	HNE_0254	+	hypothetical protein	3.77732	1.80276
244751	244760	HNE_0254	HNE_0254	+	hypothetical protein	3.81918	1.98438
244761	244770	HNE_0254	HNE_0254	+	hypothetical protein	3.43203	2.51579
244771	244780	HNE_0254	HNE_0254	+	hypothetical protein	3.54712	3.27591
244781	244790	HNE_0254	HNE_0254	+	hypothetical protein	3.50527	3.81405
244791	244800	HNE_0254	HNE_0254	+	hypothetical protein	3.24368	3.97549
244801	244810	HNE_0254	HNE_0254	+	hypothetical protein	3.26461	4.00912
244811	244820	HNE_0254	HNE_0254	+	hypothetical protein	3.23322	3.93513
244821	244830	HNE_0254	HNE_0254	+	hypothetical protein	3.27507	3.5248
244831	244840	HNE_0254	HNE_0254	+	hypothetical protein	3.35878	3.06738
244841	244850	HNE_0254	HNE_0254	+	hypothetical protein	3.59944	2.71759
244851	244860	HNE_0254	HNE_0254	+	hypothetical protein	3.58898	2.48889
244861	244870	HNE_0254	HNE_0254	+	hypothetical protein	3.4111	2.24672
244871	244880	HNE_0254	HNE_0254	+	hypothetical protein	3.40064	2.30054
244881	244890	HNE_0254	HNE_0254	+	hypothetical protein	3.25415	2.28036
244891	244900	HNE_0254	HNE_0254	+	hypothetical protein	3.09719	2.41489
244901	244910	HNE_0254	HNE_0254	+	hypothetical protein	3.00302	2.52252
244911	244920	HNE_0254	HNE_0254	+	hypothetical protein	3.08673	2.61669
244921	244930	HNE_0254	HNE_0254	+	hypothetical protein	3.25415	2.58979
244931	244940	HNE_0254	HNE_0254	+	hypothetical protein	3.1809	2.44853
244941	244950	HNE_0254	HNE_0254	+	hypothetical protein	3.24368	2.57633
244951	244960	HNE_0254	HNE_0254	+	hypothetical protein	3.26461	2.61669
244961	244970	HNE_0254	HNE_0254	+	hypothetical protein	3.20183	2.66378
244971	244980	HNE_0254	HNE_0254	+	hypothetical protein	3.19137	2.92612
244981	244990	HNE_0254	HNE_0254	+	hypothetical protein	3.03441	3.13465
244991	245000	HNE_0254	HNE_0254	+	hypothetical protein	3.03441	3.0472
245001	245010	HNE_0254	HNE_0254	+	hypothetical protein	3.05534	2.56288
245011	245020	HNE_0254	HNE_0254	+	hypothetical protein	2.88792	2.12564
245021	245030	HNE_0254	HNE_0254	+	hypothetical protein	2.60541	1.64805
245031	245040	HNE_0254	HNE_0254	+	hypothetical protein	2.65773	1.17718
245041	245050	HNE_0254	HNE_0254	+	hypothetical protein	2.69958	0.8812
245051	245060	HNE_0254	HNE_0254	+	hypothetical protein	2.81468	1.06955
245061	245070	HNE_0254	HNE_0254	+	hypothetical protein	2.73097	1.53369
245071	245080	HNE_0254	HNE_0254	+	hypothetical protein	2.94024	1.88348
245081	245090	HNE_0254	HNE_0254	+	hypothetical protein	3.24368	2.29381
245091	245100	HNE_0254	HNE_0254	+	hypothetical protein	3.09719	2.62342
245101	245110	HNE_0254	HNE_0254	+	hypothetical protein	3.11812	2.73105
245111	245120	HNE_0254	HNE_0254	+	hypothetical protein	3.10766	2.40144
245121	245130	HNE_0254	HNE_0254	+	hypothetical protein	3.0658	2.13237
245131	245140	HNE_0254	HNE_0254	+	hypothetical protein	3.23322	2.07856
245141	245150	HNE_0254	HNE_0254	+	hypothetical protein	3.23322	1.95748
245151	245160	HNE_0254	HNE_0254	+	hypothetical protein	3.25415	1.99784
245161	245170	HNE_0254	HNE_0254	+	hypothetical protein	3.42156	2.10546
245171	245180	HNE_0254	HNE_0254	+	hypothetical protein	3.13905	2.23327
245181	245190	HNE_0254	HNE_0254	+	hypothetical protein	3.21229	2.35435
245191	245200	HNE_0254	HNE_0254	+	hypothetical protein	3.42156	2.26018
245201	245210	HNE_0254	HNE_0254	+	hypothetical protein	3.58898	2.28036
245211	245220	HNE_0254	HNE_0254	+	hypothetical protein	3.53666	2.14582
245221	245230	HNE_0254	HNE_0254	+	hypothetical protein	3.57852	1.9373
245231	245240	HNE_0254	HNE_0254	+	hypothetical protein	3.74593	1.57405
245241	245250	HNE_0254	HNE_0254	+	hypothetical protein	3.54712	1.46642
245251	245260	HNE_0254	HNE_0254	+	hypothetical protein	3.43203	1.3588
245261	245270	HNE_0254	HNE_0254	+	hypothetical protein	3.58898	1.13682
245271	245280	HNE_0254	HNE_0254	+	hypothetical protein	3.87149	1.00228
245281	245290	HNE_0254	HNE_0254	+	hypothetical protein	3.82964	0.948467
245291	245300	HNE_0254	HNE_0254	+	hypothetical protein	3.67269	1.09646
245301	245310	HNE_0254	HNE_0254	+	hypothetical protein	3.89242	1.2579
245311	245320	HNE_0254	HNE_0254	+	hypothetical protein	3.71454	1.64132
245321	245330	HNE_0254	HNE_0254	+	hypothetical protein	3.59944	2.09201
245331	245340	HNE_0254	HNE_0254	+	hypothetical protein	3.53666	2.166
245341	245350	HNE_0254	HNE_0254	+	hypothetical protein	3.71454	2.11892
245351	245360	HNE_0254	HNE_0254	+	hypothetical protein	3.97613	1.89021
245361	245370	HNE_0254	HNE_0254	+	hypothetical protein	3.73547	1.56733
245371	245380	HNE_0254	HNE_0254	+	hypothetical protein	3.71454	1.05609
245381	245390	HNE_0254	HNE_0254	+	hypothetical protein	3.77732	0.598678
245391	245400	HNE_0254	HNE_0254	+	hypothetical protein	3.70408	0.618858
245401	245410	HNE_0254	HNE_0254	+	hypothetical protein	3.68315	0.82066
245411	245420	HNE_0254	HNE_0254	+	hypothetical protein	3.73547	1.19063
245421	245430	HNE_0254	HNE_0254	+	hypothetical protein	3.79825	1.5606
245431	245440	HNE_0254	HNE_0254	+	hypothetical protein	3.99706	1.99784
245441	245450	HNE_0254	HNE_0254	+	hypothetical protein	3.74593	2.3409
245451	245460	HNE_0254	HNE_0254	+	hypothetical protein	3.70408	2.58306
245461	245470	HNE_0254	HNE_0254	+	hypothetical protein	3.76686	2.83195
245471	245480	HNE_0254	HNE_0254	+	hypothetical protein	3.56805	2.97994
245481	245490	HNE_0254	HNE_0254	+	hypothetical protein	3.43203	2.79832
245491	245500	HNE_0254	HNE_0254	+	hypothetical protein	3.30646	2.72432
245501	245510	HNE_0254	HNE_0254	+	hypothetical protein	3.30646	2.58306
245511	245520	HNE_0254	HNE_0254	+	hypothetical protein	3.20183	2.48889
245521	245530	HNE_0254	HNE_0254	+	hypothetical protein	3.11812	2.49561
245531	245540	HNE_0254	HNE_0254	+	hypothetical protein	3.23322	2.63015
245541	245550	HNE_0254	HNE_0254	+	hypothetical protein	3.25415	2.85886
245551	245560	HNE_0254	HNE_0254	+	hypothetical protein	3.40064	2.9194
245561	245570	HNE_0254	HNE_0254	+	hypothetical protein	3.40064	3.03375
245571	245580	HNE_0254	HNE_0254	+	hypothetical protein	3.25415	3.09429
245581	245590	HNE_0254	HNE_0254	+	hypothetical protein	3.27507	3.02702
245591	245600	HNE_0254	HNE_0254	+	hypothetical protein	3.296	2.79159
245601	245610	HNE_0254	HNE_0254	+	hypothetical protein	3.21229	2.46871
245611	245620	HNE_0254	HNE_0254	+	hypothetical protein	3.0658	2.22654
245621	245630	HNE_0254	HNE_0254	+	hypothetical protein	3.00302	2.05165
245631	245640	HNE_0254	HNE_0254	+	hypothetical protein	3.03441	2.0651
245641	245650	HNE_0254	HNE_0254	+	hypothetical protein	2.82514	2.19964
245651	245660	HNE_0254	HNE_0254	+	hypothetical protein	2.83561	2.34762
245661	245670	HNE_0254	HNE_0254	+	hypothetical protein	2.9821	2.87904
245671	245680	HNE_0254	HNE_0254	+	hypothetical protein	2.96117	3.23555
245681	245690	HNE_0254	HNE_0254	+	hypothetical protein	3.04488	3.50462
245691	245700	HNE_0254	HNE_0254	+	hypothetical protein	2.88792	3.51807
245701	245710	HNE_0254	HNE_0254	+	hypothetical protein	2.94024	3.41045
245711	245720	HNE_0254	HNE_0254	+	hypothetical protein	2.94024	3.75351
245721	245730	HNE_0254	HNE_0254	+	hypothetical protein	2.62634	3.75351
245731	245740	HNE_0254	HNE_0254	+	hypothetical protein	2.72051	3.76696
245741	245750	HNE_0254	HNE_0254	+	hypothetical protein	2.51124	3.45753
245751	245760	HNE_0254	HNE_0254	+	hypothetical protein	2.51124	3.00684
245761	245770	HNE_0254	HNE_0254	+	hypothetical protein	2.49031	2.62342
245771	245780	HNE_0254	HNE_0254	+	hypothetical protein	2.46939	2.07856
245781	245790	HNE_0254	HNE_0254	+	hypothetical protein	2.65773	1.82967
245791	245800	HNE_0254	HNE_0254	+	hypothetical protein	2.84607	1.94402
245801	245810	HNE_0254	HNE_0254	+	hypothetical protein	3.14951	2.29381
245811	245820	HNE_0254	HNE_0254	+	hypothetical protein	3.31693	2.79832
245821	245830	HNE_0254	HNE_0254	+	hypothetical protein	3.51573	3.39699
245831	245840	HNE_0254	HNE_0254	+	hypothetical protein	3.27507	3.53825
245841	245850	HNE_0254	HNE_0254	+	hypothetical protein	3.03441	3.66606
245851	245860	HNE_0254	HNE_0254	+	hypothetical protein	3.12859	3.76696
245861	245870	HNE_0254	HNE_0254	+	hypothetical protein	3.05534	3.74006
245871	245880	HNE_0254	HNE_0254	+	hypothetical protein	3.05534	3.39027
245881	245890	HNE_0254	HNE_0254	+	hypothetical protein	3.31693	2.95976
245891	245900	HNE_0254	HNE_0254	+	hypothetical protein	3.65176	2.73777
245901	245910	HNE_0254	HNE_0254	+	hypothetical protein	3.725	2.47543
245911	245920	HNE_0254	HNE_0254	+	hypothetical protein	3.54712	2.32744
245921	245930	HNE_0254	HNE_0254	+	hypothetical protein	3.49481	2.30054
245931	245940	HNE_0254	HNE_0254	+	hypothetical protein	3.30646	2.55615
245941	245950	HNE_0254	HNE_0254	+	hypothetical protein	3.17044	3.2221
245951	245960	HNE_0254	HNE_0254	+	hypothetical protein	3.02395	3.66606
245961	245970	HNE_0254	HNE_0254	+	hypothetical protein	3.27507	3.99567
245971	245980	HNE_0254	HNE_0254	+	hypothetical protein	3.43203	3.86114
245981	245990	HNE_0254	HNE_0254	+	hypothetical protein	3.725	3.63916
245991	246000	HNE_0254	HNE_0254	+	hypothetical protein	3.85057	3.323
246001	246010	HNE_0254	HNE_0254	+	hypothetical protein	3.78779	2.81177
246011	246020	HNE_0254	HNE_0254	+	hypothetical protein	3.75639	2.5427
246021	246030	HNE_0254	HNE_0254	+	hypothetical protein	3.56805	2.37453
246031	246040	HNE_0254	HNE_0254	+	hypothetical protein	3.51573	2.6436
246041	246050	HNE_0254	HNE_0254	+	hypothetical protein	3.45295	2.95303
246051	246060	HNE_0254	HNE_0254	+	hypothetical protein	3.08673	3.20192
246061	246070	HNE_0254	HNE_0254	+	hypothetical protein	2.94024	3.41717
246071	246080	HNE_0254	HNE_0254	+	hypothetical protein	2.867	3.56516
246081	246090	HNE_0254	HNE_0254	+	hypothetical protein	3.01349	3.84768
246091	246100	HNE_0254	HNE_0254	+	hypothetical protein	2.94024	3.71988
246101	246110	HNE_0254	HNE_0254	+	hypothetical protein	3.08673	3.43063
246111	246120	HNE_0254	HNE_0254	+	hypothetical protein	3.19137	3.0203
246121	246130	HNE_0254	HNE_0254	+	hypothetical protein	3.17044	2.58979
246131	246140	HNE_0254	HNE_0254	+	hypothetical protein	3.0658	2.05165
246141	246150	HNE_0254	HNE_0254	+	hypothetical protein	2.87746	1.40588
246151	246160	HNE_0254	HNE_0254	+	hypothetical protein	2.74144	1.51351
246161	246170	HNE_0254	HNE_0254	+	hypothetical protein	2.97163	2.20636
246171	246180	HNE_0255	flgF	+	flagellar basal-body rod protein FlgF	3.36925	2.92612
246181	246190	HNE_0255	flgF	+	flagellar basal-body rod protein FlgF	3.62037	3.56516
246191	246200	HNE_0255	flgF	+	flagellar basal-body rod protein FlgF	3.63083	3.97549
246201	246210	HNE_0255	flgF	+	flagellar basal-body rod protein FlgF	4.09123	4.32528
246211	246220	HNE_0255	flgF	+	flagellar basal-body rod protein FlgF	3.725	4.21765
246221	246230	HNE_0255	flgF	+	flagellar basal-body rod protein FlgF	3.47388	3.88132
246231	246240	HNE_0255	flgF	+	flagellar basal-body rod protein FlgF	3.42156	3.50462
246241	246250	HNE_0255	flgF	+	flagellar basal-body rod protein FlgF	3.47388	3.06066
246251	246260	HNE_0255	flgF	+	flagellar basal-body rod protein FlgF	3.59944	2.91267
246261	246270	HNE_0255	flgF	+	flagellar basal-body rod protein FlgF	3.43203	2.48889
246271	246280	HNE_0255	flgF	+	flagellar basal-body rod protein FlgF	3.5262	2.32744
246281	246290	HNE_0255	flgF	+	flagellar basal-body rod protein FlgF	3.55759	2.21982
246291	246300	HNE_0255	flgF	+	flagellar basal-body rod protein FlgF	3.40064	2.36781
246301	246310	HNE_0255	flgF	+	flagellar basal-body rod protein FlgF	3.42156	2.79832
246311	246320	HNE_0255	flgF	+	flagellar basal-body rod protein FlgF	3.35878	3.17501
246321	246330	HNE_0255	flgF	+	flagellar basal-body rod protein FlgF	3.22276	3.76024
246331	246340	HNE_0255	flgF	+	flagellar basal-body rod protein FlgF	3.30646	3.94858
246341	246350	HNE_0255	flgF	+	flagellar basal-body rod protein FlgF	3.40064	3.99567
246351	246360	HNE_0255	flgF	+	flagellar basal-body rod protein FlgF	3.24368	3.76024
246361	246370	HNE_0255	flgF	+	flagellar basal-body rod protein FlgF	3.13905	3.43735
246371	246380	HNE_0255	flgF	+	flagellar basal-body rod protein FlgF	3.26461	3.38354
246381	246390	HNE_0255	flgF	+	flagellar basal-body rod protein FlgF	3.39017	3.31627
246391	246400	HNE_0255	flgF	+	flagellar basal-body rod protein FlgF	3.24368	3.00012
246401	246410	HNE_0255	flgF	+	flagellar basal-body rod protein FlgF	3.09719	2.87904
246411	246420	HNE_0255	flgF	+	flagellar basal-body rod protein FlgF	2.87746	2.91267
246421	246430	HNE_0255	flgF	+	flagellar basal-body rod protein FlgF	3.01349	3.06066
246431	246440	HNE_0255	flgF	+	flagellar basal-body rod protein FlgF	2.95071	3.14138
246441	246450	HNE_0255	flgF	+	flagellar basal-body rod protein FlgF	2.80422	3.28937
[truncated: 1,695 more rows]
