# Supplementary material for: Integrative and quantitative view of the CtrA regulatory network in a stalked budding bacterium
Source: PLoS Genet. 2020 Apr 23;16(4):e1008724. doi: 10.1371/journal.pgen.1008724 (PMC7200025; doi:10.1371/journal.pgen.1008724)
Supplement: S7 Data — The direct CtrA regulon is composed of genes that are differentially expressed upon CckA and/or ChpT depletion (S1 Data) and have a CtrA binding site as observed by ChIP-seq (S6 Data) or of genes that are in an operon with such genes. Genes that are present in the same operon (predicted by DOOR2) are highlighted in the same color. The functional classification of these genes was performed by manual annotation using the Uniprot database and is also reflected by the COG categories. (XLSX) [file pgen.1008724.s023.xlsx]

## Sheet: Direct CtrA regulon
		ChpT unind.				CckA unind.				wt unind.
Locus tag	Annotation	Averge RPKM	fold change	log2 fold change	T-Test	Averge RPKM	fold change	log2 fold change	T-Test	Averge RPKM	CtrA ChIP
HNE_0069	?	188.827	3.84658	1.94358	0.055345	181.958	3.70664	1.89011	0.0363525	49.0897	yes
HNE_0086	?	140.495	0.229819	-2.12143	0.00225402	81.5634	0.13342	-2.90595	0.00227631	611.327	yes
HNE_0119	?	282.777	2.21781	1.14913	0.0404733	514.673	4.03657	2.01313	0.00988743	127.503	yes
HNE_0120	msrB1	719.833	4.79983	2.26298	0.127788	716.711	4.77901	2.25671	0.00383498	149.97	yes
HNE_0179	?	41.5567	0.332026	-1.59063	0.0453831	61.2079	0.489032	-1.032	0.375432	125.161	yes
HNE_0239	?	566.728	3.06117	1.61408	0.0250532	150.579	0.81335	-0.298052	0.335012	185.134	no
HNE_0240	?	555.905	3.18697	1.67218	0.000384072	133.455	0.765092	-0.386295	0.410384	174.43	no
HNE_0241	fliL	1456.19	4.11559	2.0411	0.0255309	340.809	0.963218	-0.0540655	0.760088	353.823	yes
HNE_0242	fliF	926.093	2.76574	1.46766	0.00305243	239.648	0.715699	-0.482574	0.186949	334.845	yes
HNE_0243	?	465.671	2.87005	1.52107	0.0351471	159.235	0.981404	-0.0270808	0.934522	162.252	no
HNE_0244	fliN	6162.79	2.36147	1.23969	0.101355	1305.19	0.500126	-0.999636	0.0343428	2609.72	no
HNE_0245	fliP	727.892	2.39499	1.26002	0.0207125	211.617	0.696284	-0.522253	0.104056	303.923	no
HNE_0246	fliG	357.915	1.87085	0.903695	0.0725395	133.172	0.696102	-0.522629	0.301525	191.311	no
HNE_0251	motB	73.0486	0.448723	-1.1561	0.0479305	44.7584	0.274942	-1.8628	0.0846136	162.792	yes
HNE_0268	fliI	374.209	4.14158	2.05018	0.0464471	178.794	1.97881	0.984632	0.124717	90.3544	yes
HNE_0269	flgB	2145.28	4.18948	2.06677	0.00567686	410.709	0.802066	-0.318207	0.049855	512.064	yes
HNE_0270	flgC	1415.58	1.96946	0.977798	0.00708125	254.003	0.353387	-1.50068	0.0278148	718.768	no
HNE_0271	fliE	873.395	1.77124	0.824758	0.107987	170.349	0.345466	-1.53338	0.0907024	493.099	yes
HNE_0272	fliQ	147.826	3.8416	1.94171	0.0673882	73.1835	1.90184	0.927398	0.438353	38.4803	no
HNE_0273	flhA	515.266	2.77954	1.47485	0.0140526	140.578	0.758332	-0.399098	0.293464	185.378	no
HNE_0274	fliR	115.848	3.51066	1.81174	0.0028991	87.6627	2.65653	1.40955	0.398764	32.9989	no
HNE_0275	flhB	127.938	1.81722	0.861733	0.010577	72.3041	1.027	0.0384393	0.946985	70.403	no
HNE_0276	?	33.1955	3.05814	1.61266	0.162741	28.0095	2.58039	1.36759	0.449961	10.8548	no
HNE_0281	ECF-Sigma	321.606	0.605614	-0.72353	0.00615883	169.802	0.319753	-1.64497	0.0180467	531.041	yes
HNE_0333	RR	762.997	0.645265	-0.632037	0.0140003	195.415	0.165262	-2.59717	0.00185471	1182.46	yes
HNE_0390	ftsZ	192.13	0.886349	-0.174054	0.22074	88.436	0.407981	-1.29343	0.0425841	216.765	yes
HNE_0391	ftsA	168.739	0.823305	-0.280501	0.284934	92.7597	0.45259	-1.14372	0.101025	204.953	no
HNE_0392	ftsQ	212.554	0.948786	-0.075846	0.29791	83.7588	0.373878	-1.41936	0.014031	224.027	yes
HNE_0393	ddl	754.983	1.09422	0.129908	0.383357	241.697	0.350301	-1.51333	0.0329544	689.971	no
HNE_0457	?	76.9243	0.410752	-1.28366	0.0217553	49.0477	0.2619	-1.93291	0.0341401	187.277	no
HNE_0458	?	208.908	0.375003	-1.41502	0.0187257	79.6951	0.143058	-2.80533	0.00639359	557.082	yes
HNE_0753	?	973.122	1.07947	0.110322	0.295767	338.838	0.375867	-1.4117	0.017746	901.482	yes
HNE_0759	tadE	24.0278	0.384376	-1.37941	0.0167523	27.7585	0.444057	-1.17118	0.236555	62.5111	yes
HNE_0760	?	17.0954	0.360099	-1.47353	0.0134242	25.8574	0.544663	-0.876565	0.4399	47.4741	no
HNE_0856	?	130.348	0.178188	-2.48853	0.0488149	74.4058	0.101714	-3.29741	0.0469988	731.519	yes
HNE_0894	motB	24.7402	0.303969	-1.718	0.0108533	29.5259	0.362768	-1.46288	0.186681	81.3905	yes
HNE_0906	?	30.5513	0.140516	-2.83119	0.0273339	31.6709	0.145666	-2.77927	0.0281271	217.422	yes
HNE_0967	His-KA	69.3206	0.438824	-1.18829	0.0746465	52.6856	0.333519	-1.58416	0.024789	157.969	yes
HNE_1011	?	37.8138	0.389871	-1.35893	0.0206633	160.944	1.65938	0.73064	0.312465	96.9905	yes
HNE_1012	?	141.25	1.31289	0.392741	0.671768	296.071	2.75191	1.46043	0.375661	107.587	no
HNE_1059	?	1144.51	0.604999	-0.724995	0.0216744	697.555	0.368735	-1.43934	0.010612	1891.75	yes
HNE_1149	cpaB	33.438	0.150703	-2.73022	0.105677	43.4144	0.195666	-2.35354	0.0529043	221.88	yes
HNE_1151	?	28.2889	0.267513	-1.90232	0.048221	69.0139	0.652626	-0.615672	0.654681	105.748	no
HNE_1152	cpaE	26.5841	0.146886	-2.76723	0.0329134	35.9053	0.198389	-2.3336	0.0747165	180.984	no
HNE_1153	?	17.0064	0.179719	-2.47619	0.0253835	30.814	0.325634	-1.61868	0.191686	94.6278	no
HNE_1154	tadB	25.2957	0.350109	-1.51412	0.0148745	40.692	0.563204	-0.828271	0.467986	72.2509	no
HNE_1155	tadC	34.9883	0.350184	-1.51381	0.0692897	65.2454	0.653016	-0.614809	0.618739	99.9138	no
HNE_1189	?	334.469	0.578889	-0.788641	0.0173136	240.49	0.416233	-1.26454	0.00621919	577.778	yes
HNE_1390	sciP	515.94	0.0739792	-3.75674	0.0179381	166.67	0.0238983	-5.38695	0.0258311	6974.13	yes
HNE_1423	GGDEF	120.632	0.331971	-1.59087	0.00685346	56.0227	0.154171	-2.69739	0.0195109	363.38	yes
HNE_1815	rlpA	76.1048	0.194296	-2.36367	0.00870814	58.5913	0.149584	-2.74097	0.0184483	391.695	yes
HNE_1958	?	99.6647	0.520738	-0.941371	0.129802	87.384	0.456573	-1.13108	0.124264	191.391	no
HNE_1959	?	103.298	0.670322	-0.577074	0.0210495	78.9352	0.512228	-0.965142	0.149425	154.102	no
HNE_1960	GGDEF	55.3519	0.136113	-2.87712	0.00305019	35.4496	0.0871724	-3.51999	0.0264804	406.661	yes
HNE_1978	?	784.474	2.44103	1.28749	0.0292875	329.556	1.02547	0.0362877	0.880441	321.37	yes
HNE_2067	EAL	35.0862	0.153596	-2.70279	0.0282489	32.9004	0.144027	-2.79559	0.063427	228.432	yes
HNE_2122	?	471.918	0.167476	-2.57797	0.0374515	313.238	0.111163	-3.16925	0.0286997	2817.82	yes
HNE_2434	?	69.1205	0.350811	-1.51124	0.017534	60.7871	0.308515	-1.69659	0.0441485	197.031	yes
HNE_2435	GGDEF+EAL	54.4266	0.315547	-1.66407	0.0347511	51.5354	0.298785	-1.74282	0.116201	172.483	no
HNE_2533	?	86.8875	0.233622	-2.09775	0.012915	67.3978	0.181219	-2.4642	0.0197147	371.915	yes
HNE_2554	?	24.8898	3.53753	1.82274	0.0112507	42.1471	5.99026	2.58262	0.42063	7.03594	yes
HNE_2555	?	22.7739	2.11787	1.08261	0.0799351	49.6259	4.61497	2.20632	0.291869	10.7532	no
HNE_2558	GGDEF	109.965	0.409823	-1.28693	0.0210774	86.1048	0.320898	-1.63981	0.183215	268.324	yes
HNE_2703	?	57.2386	0.207289	-2.27028	0.0357101	47.2149	0.170988	-2.54803	0.0178848	276.129	yes
HNE_2704	?	29.0457	0.418048	-1.25826	0.0100238	32.1162	0.462242	-1.11328	0.326395	69.4793	no
HNE_2724	?	3400.26	3.90209	1.96425	0.0090013	10531.3	12.0856	3.59522	0.112588	871.395	yes
HNE_2472	?	233.399	0.332656	-1.5879	0.0097221	211.112	0.300891	-1.73269	0.0210012	701.622	yes
HNE_2473	?	409.877	0.247933	-2.01198	0.0093586	307.62	0.186078	-2.42602	0.0108271	1653.18	no
HNE_2474	?	135.264	0.30713	-1.70308	0.0204374	128.387	0.291515	-1.77836	0.0486414	440.415	no
HNE_2913	?	79.8769	0.649349	-0.622933	0.0586206	75.1245	0.610715	-0.711428	0.255364	123.011	no
HNE_2914	?	102.762	0.230708	-2.11586	0.0453468	44.605	0.100142	-3.31988	0.0218525	445.419	yes
HNE_2932	?	334.2	0.677851	-0.560959	0.0529053	197.858	0.401311	-1.31721	0.0189049	493.028	no
HNE_2937	mreB	797.088	1.02332	0.0332581	0.797073	310.058	0.39806	-1.32894	0.0481729	778.923	yes
HNE_2944	?	600.055	1.62841	0.703464	0.282892	1371.86	3.72291	1.89643	0.0277366	368.491	yes
HNE_3009	?	273.133	1.19776	0.260342	0.162008	102.377	0.448952	-1.15537	0.0683228	228.036	no
HNE_3010	?	383.789	1.32833	0.409613	0.0817141	124.496	0.430891	-1.21461	0.0185231	288.926	no
HNE_3011	cpaF	326.665	1.37203	0.456314	0.0546513	101.644	0.426918	-1.22797	0.074663	238.089	no
HNE_3012	cpaE	564.188	1.34297	0.425428	0.0744221	137.386	0.327027	-1.61252	0.0219527	420.104	no
HNE_3013	cpaD	809.972	1.21551	0.281559	0.221843	189.06	0.283719	-1.81747	0.0452249	666.365	no
HNE_3014	cpaC	461.149	1.28639	0.363323	0.127106	117.105	0.326668	-1.6141	0.00741546	358.484	no
HNE_3015	cpaB	818.065	1.39565	0.480938	0.163652	206.232	0.35184	-1.50701	0.00987955	586.153	yes
HNE_3016	cpaA	158.826	0.863621	-0.211531	0.136637	56.4543	0.306972	-1.70382	0.0336819	183.907	yes
HNE_3019	tadE	58.687	0.158193	-2.66024	0.0445187	55.1069	0.148543	-2.75105	0.0179434	370.983	yes
HNE_3020	flp	115.525	0.197008	-2.34368	0.0366165	98.4399	0.167872	-2.57457	0.0129359	586.399	no
HNE_3039	tacA	234.439	0.384408	-1.37929	0.0335637	101.768	0.166868	-2.58322	0.045941	609.871	yes
HNE_3070	?	431.054	0.644463	-0.633831	0.0431716	266.066	0.397793	-1.32991	0.0141465	668.857	yes
HNE_3090	?	513.963	0.478919	-1.06215	0.0153005	255.551	0.238127	-2.0702	0.0100679	1073.17	yes
HNE_3269	?	43.2126	0.191975	-2.38101	0.00917874	36.4992	0.16215	-2.6246	0.00779501	225.095	yes
HNE_3292	pspF	127.267	3.04578	1.60681	0.0235607	289.56	6.9298	2.79281	0.00265195	41.7848	yes
HNE_3293	?	3996.89	20.4352	4.35298	0.0369033	10820.5	55.3229	5.78981	0.0955873	195.589	yes
HNE_3294	pspA	1910.07	40.1108	5.32592	0.0993392	6426.92	134.963	7.07642	0.128255	47.6199	no
HNE_3369	?	2126.36	2.86671	1.51939	0.0451965	2084.96	2.81089	1.49103	0.013461	741.743	yes
HNE_3532	?	454.954	0.640119	-0.643588	0.0814651	148.094	0.208368	-2.2628	0.0334846	710.733	yes
HNE_3541	ftsK	472.698	1.29968	0.378155	0.0147478	112.904	0.31043	-1.68766	0.000735185	363.703	yes

## Sheet: COGs
NCBI-GI	Locus tag	NC_code	COG	COG category	COG function		COG functions	Name	Percentage		COG functions	Name	Percentage		COG functions	Name	Percentage
114799723	HNE_0069	NC_008358	-	-	-		-	None annotated	29.7872		U	Intracellular trafficking, secretion, and vesicular transpor	15.9574		DYVTMNZWUO	Cell process & signaling	42.5532
114798718	HNE_0086	NC_008358	COG5430	Function unknown	S		U	Intracellular trafficking, secretion, and vesicular transport	15.9574		T	Signal transduction mechanisms	8.51064		RS-	Poorly characterized	37.234
114797682	HNE_0119	NC_008358	-	-	-		NU	Cell motility; Intracellular trafficking, secretion, and vesicular transport	11.7021		N	Cell motility	6.38298		multiple classes	multiple classes	14.8936
114800218	HNE_0120	NC_008358	COG0229	Posttranslational modification, protein turnover, chaperones	O		T	Signal transduction mechanisms	8.51064		D	Cell cycle control, cell division, chromosome partitioning	5.31915		JAKLB	Information storage & processing	2.12766
114797635	HNE_0179	NC_008358	-	-	-		N	Cell motility	6.38298		M	Cell wall/membrane/envelope biogenesis	4.25532		CGEFHIPQ	Metabolism	3.19149
114799076	HNE_0239	NC_008358	COG3334	Function unknown	S		D	Cell cycle control, cell division, chromosome partitioning	5.31915		O	Posttranslational modification, protein turnover, chaperones	1.06383
114798928	HNE_0240	NC_008358	-	-	-		S	Function unknown	5.31915		V	Defense mechanisms	1.06383
114797942	HNE_0241	NC_008358	COG1580	Cell motility	N		M	Cell wall/membrane/envelope biogenesis	4.25532		-	None annotated	29.7872
114800445	HNE_0242	NC_008358	COG1766	Cell motility; Intracellular trafficking, secretion, and vesicular transport	NU		R	General function prediction only	2.12766		S	Function unknown	5.31915
114797896	HNE_0243	NC_008358	-	-	-		C	Energy production and conversion	2.12766		R	General function prediction only	2.12766
114798836	HNE_0244	NC_008358	COG1886	Cell motility; Intracellular trafficking, secretion, and vesicular transport	NU		K	Transcription	2.12766		K	Transcription	2.12766
114798811	HNE_0245	NC_008358	COG1338	Cell motility; Intracellular trafficking, secretion, and vesicular transport	NU		KT	Transcription; Signal transduction mechanisms	2.12766		C	Energy production and conversion	2.12766
114800000	HNE_0246	NC_008358	COG1536	Cell motility	N		O	Posttranslational modification, protein turnover, chaperones	1.06383		Q	Secondary metabolites biosynthesis, transport and catabolism	1.06383
114797285	HNE_0251	NC_008358	COG1360	Cell motility	N		V	Defense mechanisms	1.06383			Multiple classes	14.8936
114799102	HNE_0268	NC_008358	COG1157	Cell motility; Intracellular trafficking, secretion, and vesicular transport	NU		OU	Posttranslational modification, protein turnover, chaperones; Intracellular trafficking, secretion, and vesicular transport	1.06383
114798179	HNE_0269	NC_008358	COG1815	Cell motility	N		Q	Secondary metabolites biosynthesis, transport and catabolism	1.06383
114797235	HNE_0270	NC_008358	COG1558	Cell motility	N
114799787	HNE_0271	NC_008358	COG1677	Cell motility; Intracellular trafficking, secretion, and vesicular transport	NU
114797953	HNE_0272	NC_008358	COG1987	Cell motility; Intracellular trafficking, secretion, and vesicular transport	NU
114797604	HNE_0273	NC_008358	COG1298	Cell motility; Intracellular trafficking, secretion, and vesicular transport	NU
114799957	HNE_0274	NC_008358	COG1684	Cell motility; Intracellular trafficking, secretion, and vesicular transport	NU
114799674	HNE_0275	NC_008358	COG1377	Cell motility; Intracellular trafficking, secretion, and vesicular transport	NU
114798442	HNE_0276	NC_008358	-	-	-
114799169	HNE_0281	NC_008358	COG1595	Transcription	K
114799030	HNE_0333	NC_008358	COG0784	Signal transduction mechanisms	T
114797115	HNE_0390	NC_008358	COG0206	Cell cycle control, cell division, chromosome partitioning	D
114798337	HNE_0391	NC_008358	COG0849	Cell cycle control, cell division, chromosome partitioning	D
114798641	HNE_0392	NC_008358	COG1589	Cell wall/membrane/envelope biogenesis	M
114799909	HNE_0393	NC_008358	COG1181	Cell wall/membrane/envelope biogenesis	M
114799275	HNE_0457	NC_008358	COG4961	Intracellular trafficking, secretion, and vesicular transport	U
114798549	HNE_0458	NC_008358	COG4961	Intracellular trafficking, secretion, and vesicular transport	U
114799424	HNE_0753	NC_008358	-	-	-
114799024	HNE_0759	NC_008358	COG4961	Intracellular trafficking, secretion, and vesicular transport	U
114799760	HNE_0760	NC_008358	COG4655	Function unknown	S
114799853	HNE_0856	NC_008358	-	-	-
114799250	HNE_0894	NC_008358	COG1360	Cell motility	N
114798468	HNE_0906	NC_008358	-	-	-
114798384	HNE_0967	NC_008358	COG0642	Signal transduction mechanisms	T
114799446	HNE_1011	NC_008358	COG1579	General function prediction only	R
114800242	HNE_1012	NC_008358	-	-	-
114799833	HNE_1059	NC_008358	COG3152	Function unknown	S
114797097	HNE_1149	NC_008358	COG3745	Intracellular trafficking, secretion, and vesicular transport	U
114798599	HNE_1151	NC_008358	-	-	-
114799365	HNE_1152	NC_008358	COG4963	Intracellular trafficking, secretion, and vesicular transport	U
114799052	HNE_1153	NC_008358	COG4962	Intracellular trafficking, secretion, and vesicular transport	U
114797844	HNE_1154	NC_008358	COG4965	Intracellular trafficking, secretion, and vesicular transport	U
114799044	HNE_1189	NC_008358	COG1020	Secondary metabolites biosynthesis, transport and catabolism	Q
114800177	HNE_1155	NC_008358	COG2064	Cell motility; Intracellular trafficking, secretion, and vesicular transport	NU
114798007	HNE_1390	NC_008358	-	-	-
114800534	HNE_1423	NC_008358	COG5001	Signal transduction mechanisms	T
114797813	HNE_1815	NC_008358	COG0797	Cell wall/membrane/envelope biogenesis	M
114800007	HNE_1958	NC_008358	COG3837	Function unknown	S
114798700	HNE_1959	NC_008358	COG1804	Energy production and conversion	C
114797892	HNE_1960	NC_008358	COG2199	Signal transduction mechanisms	T
114800148	HNE_1978	NC_008358	COG2919	Cell cycle control, cell division, chromosome partitioning	D
114799143	HNE_2067	NC_008358	COG2200	Signal transduction mechanisms	T
114797887	HNE_2122	NC_008358	-	-	-
114798242	HNE_2434	NC_008358	-	-	-
114798127	HNE_2435	NC_008358	COG5001	Signal transduction mechanisms	T
114798470	HNE_2472	NC_008358	-	-	-
114797273	HNE_2473	NC_008358	-	-	-
114797954	HNE_2474	NC_008358	-	-	-
114798868	HNE_2533	NC_008358	COG3183	Defense mechanisms	V
114798073	HNE_2554	NC_008358	COG3355	Transcription	K
114797764	HNE_2555	NC_008358	-	-	-
114799302	HNE_2558	NC_008358	COG2199	Signal transduction mechanisms	T
114799187	HNE_2703	NC_008358	-	-	-
114799724	HNE_2704	NC_008358	COG2831	Intracellular trafficking, secretion, and vesicular transport	U
114797279	HNE_2724	NC_008358	-	-	-
114798035	HNE_2913	NC_008358	-	-	-
114800406	HNE_2914	NC_008358	-	-	-
114799725	HNE_2932	NC_008358	COG0733	General function prediction only	R
114800181	HNE_2937	NC_008358	COG1077	Cell cycle control, cell division, chromosome partitioning	D
114800016	HNE_2944	NC_008358	-	-	-
114798130	HNE_3009	NC_008358	COG2064	Cell motility; Intracellular trafficking, secretion, and vesicular transport	NU
114798049	HNE_3010	NC_008358	COG4965	Intracellular trafficking, secretion, and vesicular transport	U
114800387	HNE_3011	NC_008358	COG4962	Intracellular trafficking, secretion, and vesicular transport	U
114797644	HNE_3012	NC_008358	COG4963	Intracellular trafficking, secretion, and vesicular transport	U
114798148	HNE_3013	NC_008358	COG5461	-	-
114799376	HNE_3014	NC_008358	COG4964	Intracellular trafficking, secretion, and vesicular transport	U
114799072	HNE_3015	NC_008358	COG3745	Intracellular trafficking, secretion, and vesicular transport	U
114800034	HNE_3016	NC_008358	COG4960	Posttranslational modification, protein turnover, chaperones; Intracellular trafficking, secretion, and vesicular transport	OU
114797939	HNE_3019	NC_008358	COG4961	Intracellular trafficking, secretion, and vesicular transport	U
114798948	HNE_3020	NC_008358	COG4961	Intracellular trafficking, secretion, and vesicular transport	U
114797505	HNE_3039	NC_008358	COG2204	Signal transduction mechanisms	T
114800274	HNE_3070	NC_008358	COG4231	Energy production and conversion	C
114798780	HNE_3090	NC_008358	-	-	-
114800496	HNE_3269	NC_008358	-	-	-
114799167	HNE_3292	NC_008358	COG3604	Transcription; Signal transduction mechanisms	KT
114800010	HNE_3293	NC_008358	-	-	-
114797618	HNE_3294	NC_008358	COG1842	Transcription; Signal transduction mechanisms	KT
114798828	HNE_3369	NC_008358	COG3133	Cell wall/membrane/envelope biogenesis	M
114800343	HNE_3532	NC_008358	-	-	-
114797355	HNE_3541	NC_008358	COG1674	Cell cycle control, cell division, chromosome partitioning	D
